# Supplementary material
Source: PubMed Central journal article supplement (PMC10353068)
Supplement: pt3c00084_si_001.pdf [file pt3c00084_si_001.pdf]

# Synthesis, Structural Modification and Bioactivity Evaluation of Substituted Acridones as Potent Microtubule Affinity-Regulating Kinase 4 Inhibitors

Maria Voura,<sup>a</sup> Saleha Anwar,<sup>b</sup> Ioanna Sigala,<sup>c</sup> Eleftheria Parasidou,<sup>a</sup> Souzanna Fragoulidou,<sup>a</sup> Md. Imtaiyaz Hassan<sup>b\*</sup> and Vasiliki Sarli<sup>a\*</sup>

<sup>a</sup> Laboratory of Organic Chemistry, Department of Chemistry, Aristotle University of Thessaloniki, University Campus, 54124, Thessaloniki, Greece, [sarli@chem.auth.gr](mailto:sarli@chem.auth.gr)

<sup>b</sup> Centre for interdisciplinary research in Basic Sciences, Jamia Millia Islamia, Jamia Nagar, New Delhi, 110025, India.

<sup>c</sup> Laboratory of Biochemistry, Department of Chemistry, Aristotle University of Thessaloniki, University Campus, 54124, Thessaloniki, Greece.

| Table of contents |                                                                                              |    |
|-------------------|----------------------------------------------------------------------------------------------|----|
| 1                 | Table S1. Docking scores and interactions between MARK4 and synthesized acridones            | 3  |
| 2                 | Table S2. Druglikeness of synthesized acridones.                                             | 5  |
| 3                 | Docking studies figures S1-S2                                                                | 6  |
| 4                 | Docking studies figures S3-S4                                                                | 7  |
| 5                 | Docking studies figures S5-S6                                                                | 8  |
| 6                 | Docking studies figures S7-S8                                                                | 9  |
| 7                 | Docking studies figures S9-S10                                                               | 10 |
| 8                 | Docking studies figures S11-S12                                                              | 11 |
| 9                 | Docking studies figures S13-S14                                                              | 12 |
| 10                | Docking studies figures S15-S16                                                              | 13 |
| 11                | Docking studies figures S17-S18                                                              | 14 |
| 12                | Docking studies figures S19-S20                                                              | 15 |
| 13                | Docking studies figures S21                                                                  | 16 |
| 14                | <sup>1</sup> H-NMR and <sup>13</sup> C-NMR spectra of <i>N</i> -alkylated acridone analogues | 17 |
| 15                | <sup>1</sup> H-NMR and <sup>13</sup> C-NMR spectra of piperazine analogues                   | 27 |
| 16                | <sup>1</sup> H-NMR and <sup>13</sup> C-NMR spectra of analogues with tryptophan              | 42 |
| 17                | LC/ESI-MS analysis for compounds <b>9a-i</b> and <b>10</b>                                   | 58 |
| 18                | LC/ESI-MS analysis for compounds <b>S1</b> , <b>15a-d</b> , and <b>16a-h</b>                 | 69 |
| 19                | LC/ESI-MS analysis for compound <b>19</b>                                                    | 84 |
| 20                | LC/ESI-MS analysis for compound <b>23a</b>                                                   | 85 |
| 21                | LC/ESI-MS analysis for compound <b>23b</b>                                                   | 86 |

|           |                                             |           |
|-----------|---------------------------------------------|-----------|
| <b>22</b> | LC/ESI-MS analysis for compound <b>23c</b>  | <b>87</b> |
| <b>23</b> | LC/ESI-MS analysis for compounds <b>23d</b> | <b>88</b> |
| <b>24</b> | LC/ESI-MS analysis for compound <b>14</b>   | <b>89</b> |
| <b>25</b> | LC/ESI-MS analysis for compound <b>20</b>   | <b>91</b> |

**Table S1. Docking scores and interactions between MARK4 and synthesized acridones.**

| Compound | Binding score (Kcal/mol) | Hydrogen bonds                                                           | Other interacting residues                                                                                                                                           |
|----------|--------------------------|--------------------------------------------------------------------------|----------------------------------------------------------------------------------------------------------------------------------------------------------------------|
| 9a       | -9.4                     | Ala135 (2.90 Å)                                                          | Ala83, Val70, Glu133, Val116, Met132, Ala195, Asn183, Glu182, Asp196, Gly63, Ile62, Gly138, Tyr134, Leu185                                                           |
| 9b       | -9.5                     | -                                                                        | Ala135, Ala195, Ala83, Val116, Met132, Val70, Asp196, Lys85, Ala68, Lys69, Gly65, Gly63, Leu185, Glu139, Gly138, Ile62, Tyr134                                       |
| 9c       | -10.0                    | Gly65 (3.09 Å)                                                           | Ala135, Ala195, Ala83, Glu133, Val116, Met132, Lys64, Gly63, Lys69, Lys85, Ala68, Val70, Asp196, Leu185, Glu139, Gly138, Ile62, Tyr134                               |
| 9d       | -9.5                     | Gly65 (3.08 Å)                                                           | Ala135, Ala195, Val116, Lys85, Ala83, Val70, Met132, Asp196, Ala68, Lys69, Lys64, Gly63, Leu185, Glu139, Gly138, Ile62, Tyr134                                       |
| 9e       | -9.7                     | Gly65 (3.00 Å)<br>Lys85 (3.07 Å)                                         | Ala135, Ile62, Tyr134, Ala195, Ala83, Val116, Met132, Gly63, Val70, Ala68, Lys64, Lys69, Asp196, Lys85, Leu185, Glu139, Gly138                                       |
| 9f       | -8.6                     | Ala135 (3.14 Å)                                                          | Ala135, Leu185, Gly138, Glu139, Glu182, Asn183, Asp196, Ala195, Val70, Val116, Ala83, Met132, Glu133, Lys85, Tyr134                                                  |
| 9g       | -9.5                     | -                                                                        | Ala135, Leu185, Ala83, Glu133, Ala195, Val116, Met132, Gly63, Asp196, Lys64, Lys69, Gly65, Ala68, Lys85, Val70, Glu139, Gly138, Ile62, Tyr134                        |
| 9h       | -9.6                     | Gly65 (2.99 Å)                                                           | Ala135, Leu185, Ala83, Glu133, Ala195, Val116, Met132, Val70, Asp196, Lys69, Lys64, Ala68, Gly63, Glu139, Gly138, Ile62, Tyr134                                      |
| 9i       | -9.9                     | Gly65 (3.08 Å)                                                           | Ala135, Ala195, Glu133, Ala83, Gly63, Met132, Val116, Lys85, Lys64, Asp196, Lys69, Ala68, Val70, Leu185, Glu139, Gly138, Ile62, Tyr134                               |
| 10       | -9.6                     | Ala135 (2.80 Å)<br>Glu182 (2.01 Å)<br>Asn183 (1.85 Å)<br>Asp196 (2.75 Å) | Val70, Ala83, Glu133, Ala195, Met132, Val116, Gly63, Ile62, Gly138, Tyr134, Leu185                                                                                   |
| 15a      | -10.0                    | Ala135 (2.80 Å)                                                          | Val70, Ala83, Glu133, Val116, Ala195, Met132, Asn183, Glu182, Asp196, Gly65, Phe67, Ala68, Lys85, Gly63, Leu185, Ile62, Gly138, Tyr134                               |
| 15b      | -10.6                    | Ala135 (2.87 Å)                                                          | Ala83, Glu133, Val116, Val70, Ala195, Met132, Asn183, Glu182, Lys85, Ala68, Asn66, Gly65, Phe67, Ile87, Glu103, Gly198, Asp196, Gly63, Ile62, Leu185, Gly138, Tyr134 |
| 15c      | -10.5                    | Ala135 (2.79 Å)                                                          | Ala83, Glu133, Val116, Val70, Ala195, Met132, Asn183, Glu182, Asp196, Lys85, Gly65, Ala68, Gly198, Glu103, Phe67, Gly63, Leu185, Ile62, Gly138, Tyr134               |
| 15d      | -10.4                    | Ala135 (2.80 Å)                                                          | Ala83, Glu133, Val116, Val70, Ala195, Met132, Asn183, Glu182, Asp196, Lys85, Ala68, Gly65, Phe67, Gly198, Gly63, Leu185, Ile62, Gly138, Tyr134                       |
| 15e      | -10.3                    | Ala135 (2.80 Å)                                                          | Ala83, Glu133, Val116, Val70, Ala195, Met132, Asn183, Glu182, Asp196, Lys85, Gly65, Ala68, Phe67, Gly198, Gly63, Leu185, Ile62, Gly138, Tyr134                       |
| 16a      | -10.3                    | Ala135 (2.83 Å)                                                          | Val70, Glu133, Ala83, Leu185, Met132, Val116, Ala195, Gly63, Gly65, Lys64, Gly198, Asp178, Lys85, Glu182, Asp196, Tyr134, Gly138, Ile62                              |
| 16c      | -10.7                    | Ala135 (3.02 Å)<br>Ala68 (3.66 Å)                                        | Ala83, Val70, Glu133, Val116, Ala195, Gly63, Glu182, Asp196, Lys85, Phe67, Asn66, Ala68, Gly65, Ile62, Gly138, Tyr134, Leu185, Ala135                                |
| 16b      | -10.8                    | Ala135 (3.02 Å)<br>Lys85 (3.24 Å)                                        | Ala83, Glu133, Val116, Val70, Ala195, Gly63, Glu182, Gly198, Phe67, Gly65, Asn66, Asp196, Ala68, Ile62, Tyr134, Gly138, Leu185, Ala135                               |
| 16d      | -10.1                    | Ala135 (2.88 Å)                                                          | Val70, Ala83, Glu133, Val116, Ala195, Met132, Gly63, Gly65, Ala68, Glu182, Lys64, Asp196, Leu185, Gly138, Tyr134, Ile62                                              |
| 16e      | -10.3                    | Ala135 (2.85 Å)<br>Lys85 (3.36 Å)<br>Asn66 (3.11 Å)                      | Ala83, Glu133, Ala195, Val116, Val70, Gly63, Met132, Ala68, Lys64, Gly65, Phe199, Asp178, Glu182, Asp196, Tyr134, Ile62, Gly138, Leu185                              |
| 16f      | -10.3                    | Ala135 (2.82 Å)<br>Phe199 (3.38 Å)                                       | Val70, Ala83, Glu133, Val116, Met132, Ala195, Gly63, Gly65, Lys64, Asp178, Gly198, Glu182, Asp196, Leu185, Tyr134, Gly138, Ile62                                     |
| 16g      | -10.1                    | Ala135 (3.01 Å)                                                          | Ala83, Glu133, Val116, Ala195, Val70, Gly63, Glu182, Ala68, Gly65, Asn66, Phe67, Ser96, Leu92, Leu100, Ile87, Lys85, Asp196, Ile62, Gly138, Tyr134, Leu185, Ala135   |

**Table S1 (Continued). Docking scores and interactions between MARK4 and synthesized acridones.**

| Compound   | Binding score (Kcal/mol) | Hydrogen bonds                                        | Other interacting residues                                                                                                                                    |
|------------|--------------------------|-------------------------------------------------------|---------------------------------------------------------------------------------------------------------------------------------------------------------------|
| <b>16h</b> | -10.0                    | Ala135 (2.86 Å)                                       | Val70, Ala83, Glu133, Val116, Ala195, Met132, Gly65, Ala68, Glu182, Asn183, Gly63, Asp196, Leu185, Gly138, Ile62, Tyr134                                      |
| <b>20</b>  | -9.9                     | Ala135 (3.80 Å)<br>Asp196 (1.98 Å)<br>Glu139 (2.62 Å) | Ala83, Glu133, Ala195, Val116, Glu182, Val70, Ala68, Lys85, Lys69, Gly65, Lys64, Glu139, Ile62, Gly63, Gly138, Tyr134, Leu185                                 |
| <b>23a</b> | -10.5                    | Ala135 (2.85 Å)<br>Asp196 (1.87 Å)                    | Ala83, Glu133, Val116, Met132, Ala195, Gly63, Glu139, Asp142, Lys64, Glu182, Gly138, Ala68, Lys85, Gly65, Lys69, Tyr134, Leu185, Ile62, Val70                 |
| <b>23b</b> | -10.6                    | Ala135 (2.80 Å)<br>Asp196 (1.85 Å)                    | Leu185, Glu133, Ala83, Ala195, Met132, Val116, Glu182, Val70, Gly63, Lys85, Ala68, Lys69, Gly65, Lys64, Glu139, Asp142, Gly138, Tyr134, Ile62                 |
| <b>23c</b> | -10.3                    | Ala135 (2.87 Å)<br>Asp196 (1.87 Å)                    | Ala83, Glu133, Val116, Met132, Ala195, Gly63, Glu139, Asp142, Lys64, Glu182, Gly138, Ala68, Lys85, Gly65, Lys69, Tyr134, Leu185, Ile62, Val70                 |
| <b>23d</b> | -10.4                    | Ala135 (2.85 Å)<br>Asp196 (1.95 Å)                    | Ala83, Glu133, Val116, Met132, Ala195, Gly63, Glu139, Asp142, Ser136, Glu182, Lys64, Gly138, Ala68, Lys85, Gly65, Lys69, Leu185, Tyr134, Val70, Ile62, Ala135 |

**Table S2. Druglikeness of synthesized acridones.** (MW: Molecular Weight, MLogP: Lipophilicity, HBD: Hydrogen Bond Donor, HBA: Hydrogen Bond Acceptor, r.b.: rotatable bonds, TPSA: Topological Polar Surface Area)

| Compound   | MW (g/mol) | MLogP | HBD | HBA | r.b. | TPSA (Å <sup>2</sup> ) | Druglikeness       |                    |
|------------|------------|-------|-----|-----|------|------------------------|--------------------|--------------------|
|            |            |       |     |     |      |                        | Lipinski           | Veber              |
| <b>9a</b>  | 299.37     | 3.78  | 0   | 1   | 2    | 22.00                  | Yes (0 violations) | Yes (0 violations) |
| <b>9b</b>  | 313.39     | 3.99  | 0   | 1   | 2    | 22.00                  | Yes (0 violations) | Yes (0 violations) |
| <b>9c</b>  | 367.36     | 4.58  | 0   | 4   | 3    | 22.00                  | Yes (1 violation)  | Yes (0 violations) |
| <b>9d</b>  | 317.36     | 4.15  | 0   | 2   | 2    | 22.00                  | Yes (1 violation)  | Yes (0 violations) |
| <b>9e</b>  | 335.35     | 4.53  | 0   | 3   | 2    | 22.00                  | Yes (1 violation)  | Yes (0 violations) |
| <b>9f</b>  | 263.33     | 3.31  | 0   | 1   | 2    | 22.00                  | Yes (0 violations) | Yes (0 violations) |
| <b>9g</b>  | 355.47     | 4.63  | 0   | 1   | 3    | 22.00                  | Yes (1 violation)  | Yes (0 violations) |
| <b>9h</b>  | 324.38     | 3.04  | 0   | 2   | 2    | 45.79                  | Yes (0 violations) | Yes (0 violations) |
| <b>9i</b>  | 344.36     | 2.63  | 0   | 3   | 3    | 67.82                  | Yes (0 violations) | Yes (0 violations) |
| <b>10</b>  | 314.38     | 3.16  | 1   | 1   | 2    | 48.02                  | Yes (0 violations) | Yes (0 violations) |
| <b>15a</b> | 425.52     | 2.81  | 0   | 3   | 5    | 45.55                  | Yes (0 violations) | Yes (0 violations) |
| <b>15b</b> | 481.63     | 3.59  | 0   | 3   | 6    | 45.55                  | Yes (0 violations) | Yes (0 violations) |
| <b>15c</b> | 470.52     | 1.83  | 0   | 5   | 6    | 91.37                  | Yes (0 violations) | Yes (0 violations) |
| <b>15d</b> | 450.53     | 2.13  | 0   | 4   | 5    | 69.34                  | Yes (0 violations) | Yes (0 violations) |
| <b>15e</b> | 443.51     | 3.18  | 0   | 4   | 5    | 45.55                  | Yes (0 violations) | Yes (0 violations) |
| <b>16a</b> | 473.95     | 3.07  | 0   | 3   | 5    | 62.62                  | Yes (0 violations) | Yes (0 violations) |
| <b>16c</b> | 457.50     | 2.97  | 0   | 4   | 5    | 62.62                  | Yes (0 violations) | Yes (0 violations) |
| <b>16b</b> | 457.50     | 2.97  | 0   | 4   | 5    | 62.62                  | Yes (0 violations) | Yes (0 violations) |
| <b>16d</b> | 484.50     | 1.65  | 0   | 5   | 6    | 108.44                 | Yes (0 violations) | Yes (0 violations) |
| <b>16e</b> | 510.54     | 1.71  | 0   | 5   | 7    | 108.44                 | Yes (1 violation)  | Yes (0 violations) |
| <b>16f</b> | 508.40     | 3.53  | 0   | 3   | 5    | 62.62                  | Yes (1 violation)  | Yes (0 violations) |
| <b>16g</b> | 575.50     | 4.10  | 0   | 9   | 7    | 62.62                  | Yes (1 violation)  | Yes (0 violations) |
| <b>16h</b> | 429.47     | 1.43  | 0   | 4   | 5    | 75.76                  | Yes (0 violations) | Yes (0 violations) |
| <b>20</b>  | 453.49     | 2.07  | 3   | 4   | 7    | 104.19                 | Yes (0 violations) | Yes (0 violations) |
| <b>23a</b> | 542.63     | 3.07  | 3   | 3   | 9    | 95.99                  | Yes (1 violation)  | Yes (0 violations) |
| <b>23b</b> | 546.59     | 3.25  | 3   | 4   | 9    | 95.99                  | Yes (1 violation)  | Yes (0 violations) |
| <b>23c</b> | 563.05     | 3.34  | 3   | 3   | 9    | 95.99                  | Yes (1 violation)  | Yes (0 violations) |
| <b>23d</b> | 600.66     | 2.88  | 3   | 5   | 12   | 122.29                 | Yes (1 violation)  | No (1 violation)   |

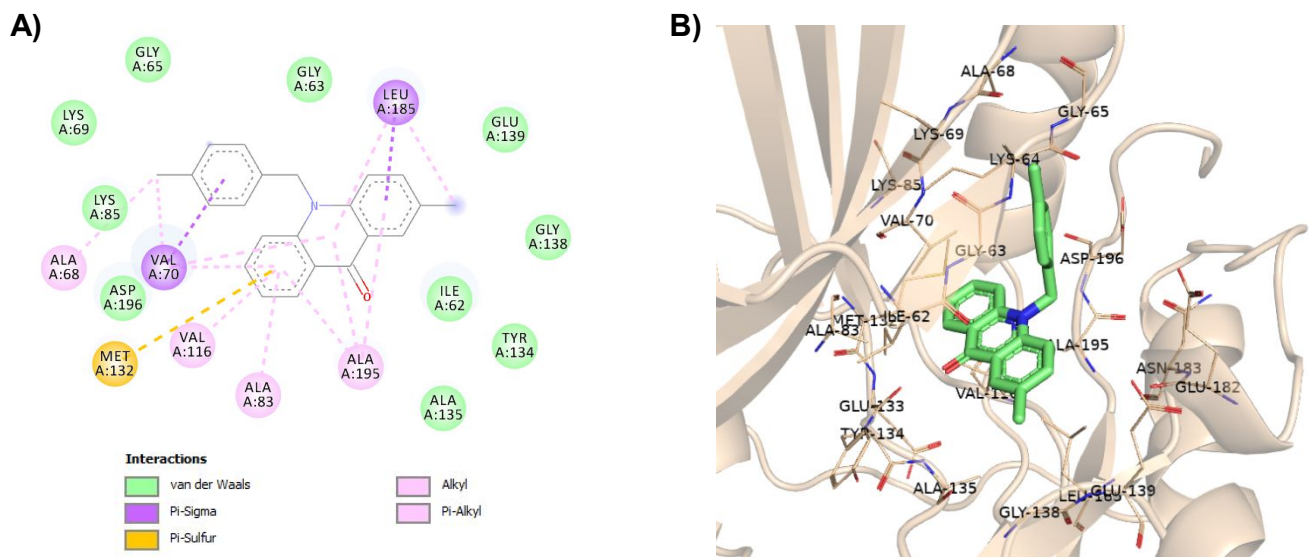

**Figure S1. (A)** 2D molecular docking model of compound **9b** in the active site of MARK4 (PDB code: 5ES1). **(B)** 3D model of the interaction between compound **9b** in the active site of MARK4 (BIOVIA Discovery Studio).

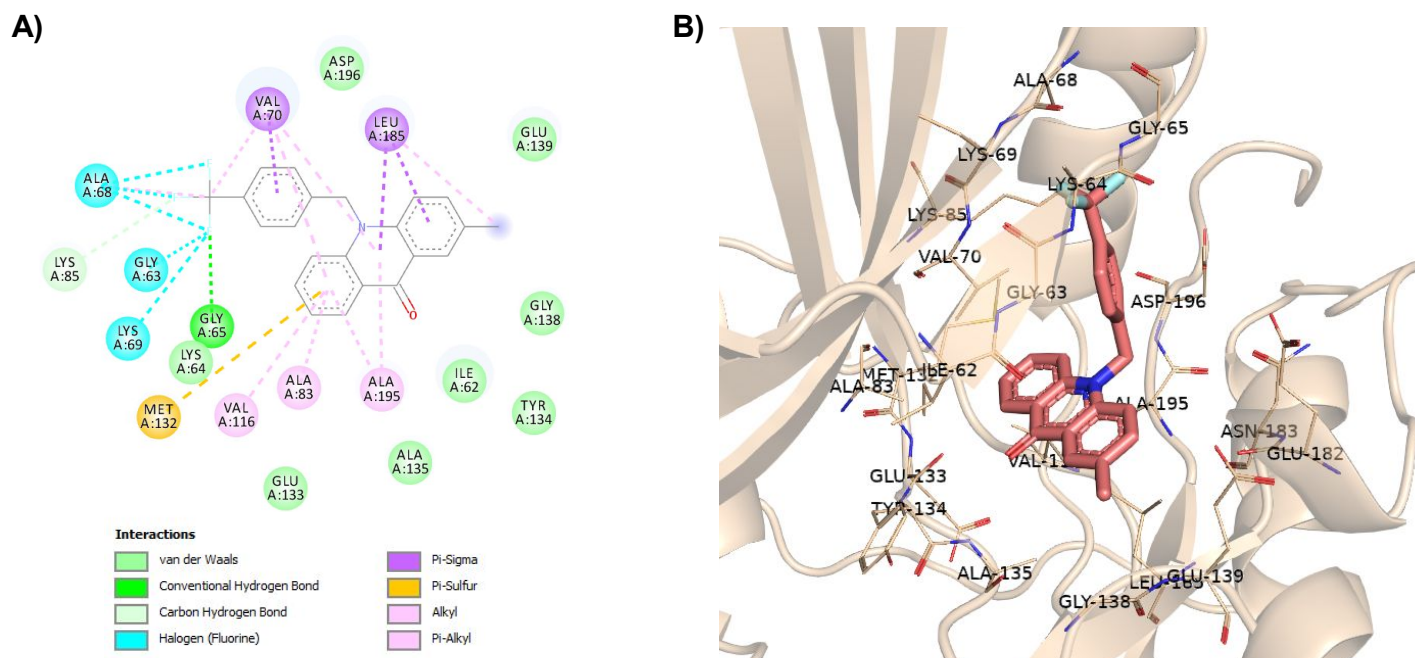

**Figure S2. (A)** 2D molecular docking model of compound **9c** in the active site of MARK4 (PDB code: 5ES1). **(B)** 3D model of the interaction between compound **9c** in the active site of MARK4 (BIOVIA Discovery Studio).

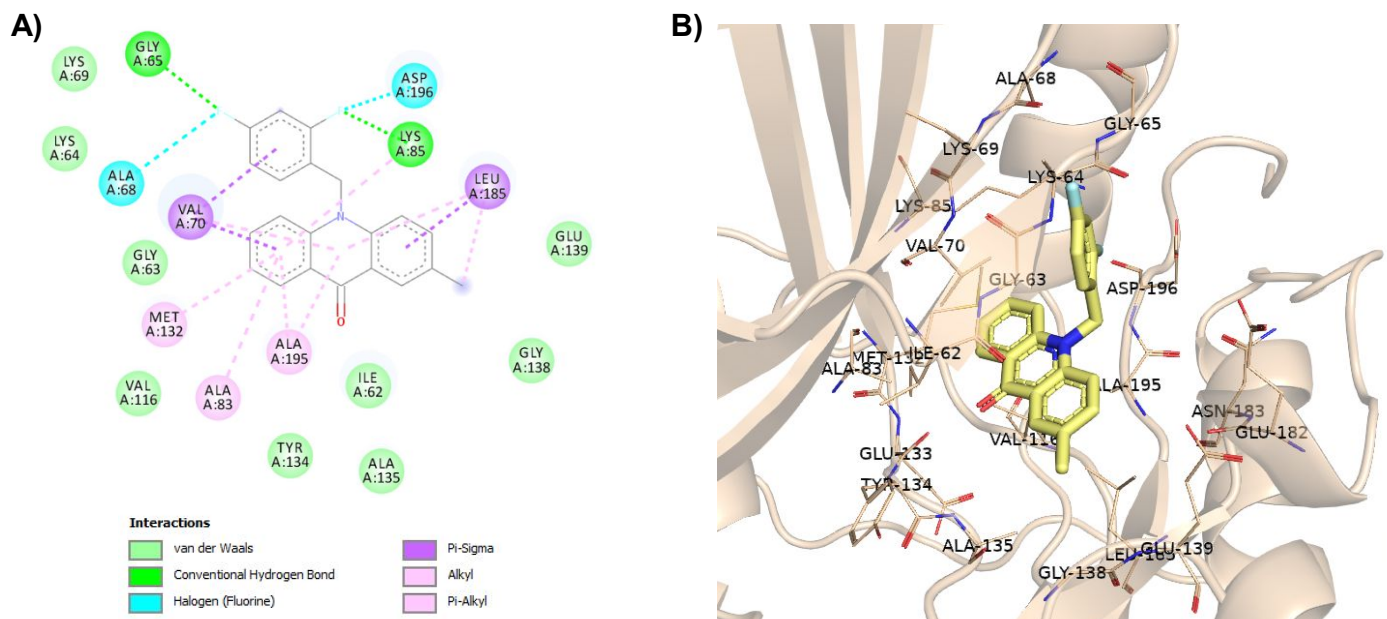

**Figure S3. (A)** 2D molecular docking model of compound **9e** in the active site of MARK4 (PDB code: 5ES1). **(B)** 3D model of the interaction between compound **9e** in the active site of MARK4 (BIOVIA Discovery Studio).

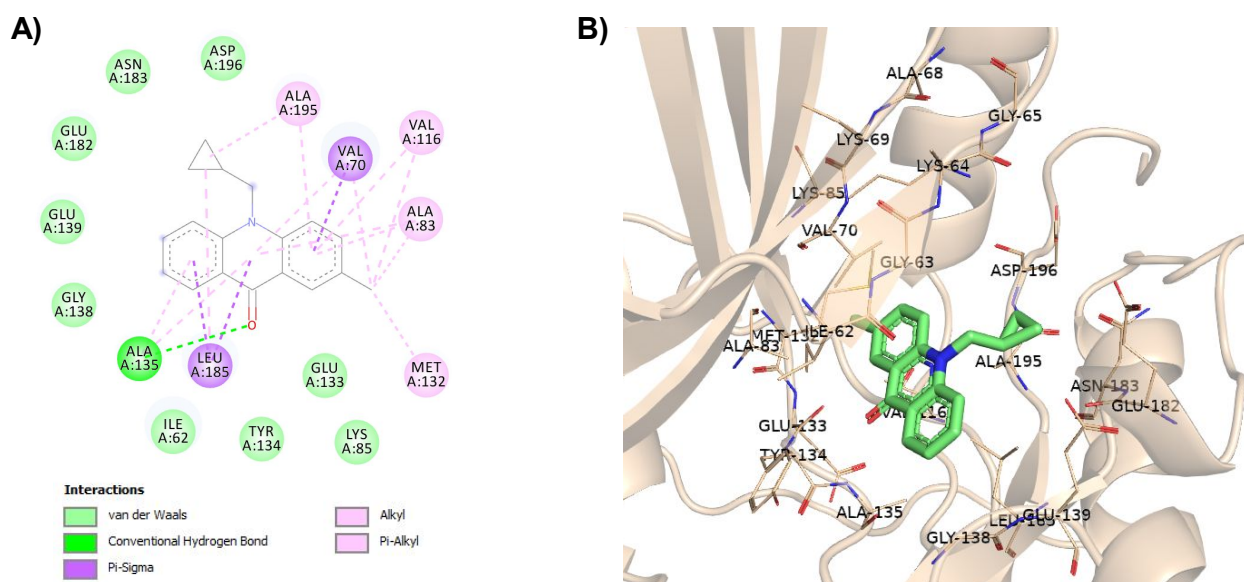

**Figure S4. (A)** 2D molecular docking model of compound **9f** in the active site of MARK4 (PDB code: 5ES1). **(B)** 3D model of the interaction between compound **9f** in the active site of MARK4 (BIOVIA Discovery Studio).

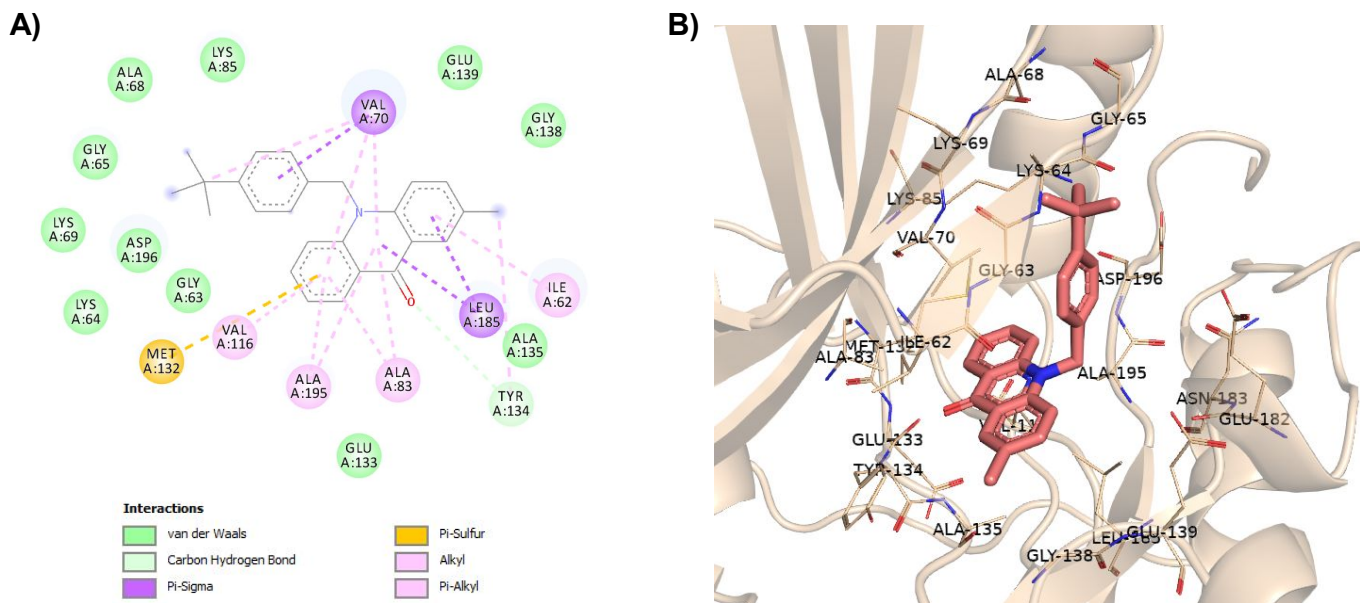

**Figure S5. (A)** 2D molecular docking model of compound **9g** in the active site of MARK4 (PDB code: 5ES1). **(B)** 3D model of the interaction between compound **9g** in the active site of MARK4 (BIOVIA Discovery Studio).

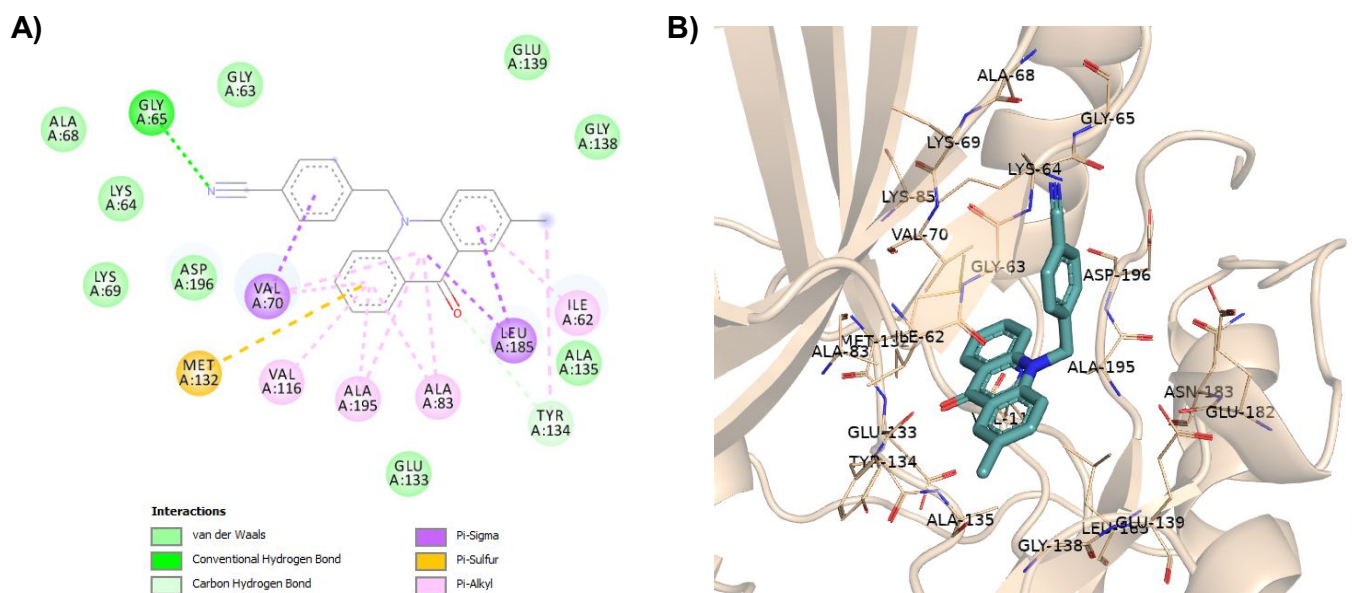

**Figure S6. (A)** 2D molecular docking model of compound **9h** in the active site of MARK4 (PDB code: 5ES1). **(B)** 3D model of the interaction between compound **9h** in the active site of MARK4 (BIOVIA Discovery Studio).





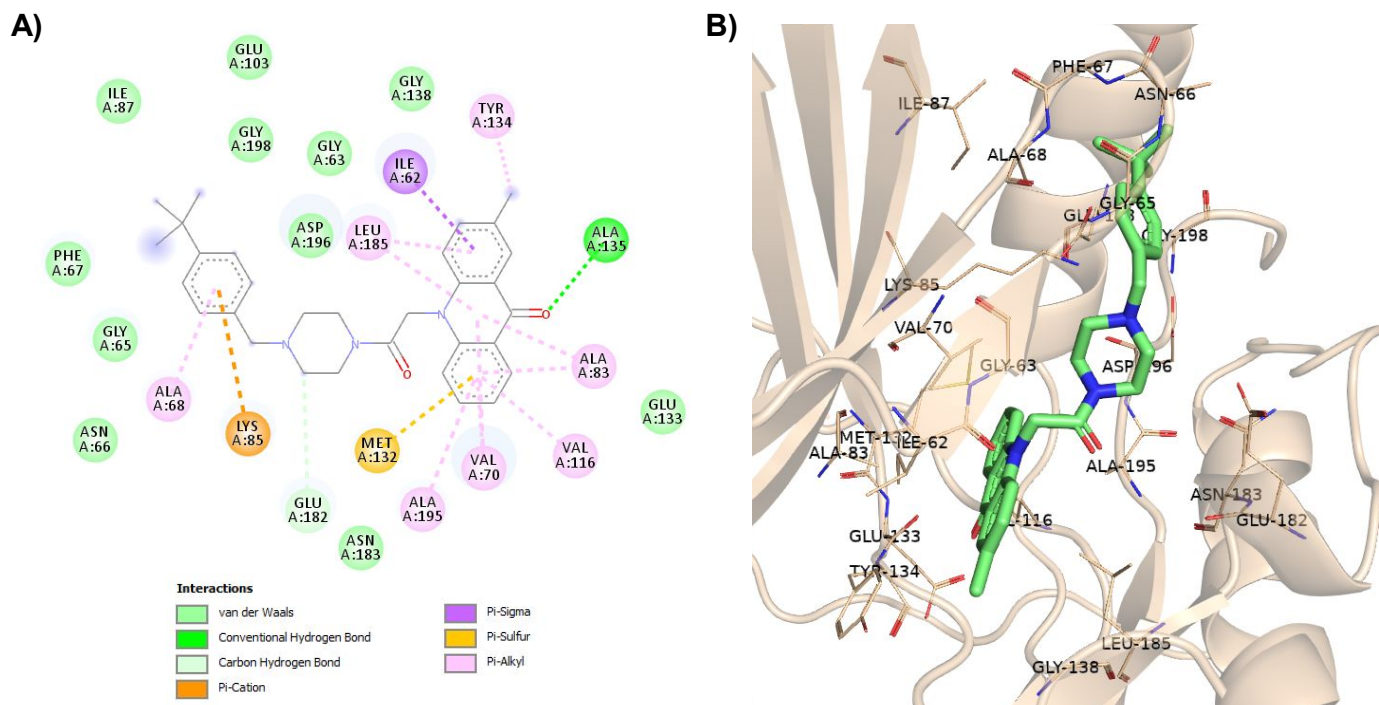

**Figure S9. (A)** 2D molecular docking model of compound **15b** in the active site of MARK4 (PDB code: 5ES1). **(B)** 3D model of the interaction between compound **15b** in the active site of MARK4 (BIOVIA Discovery Studio).

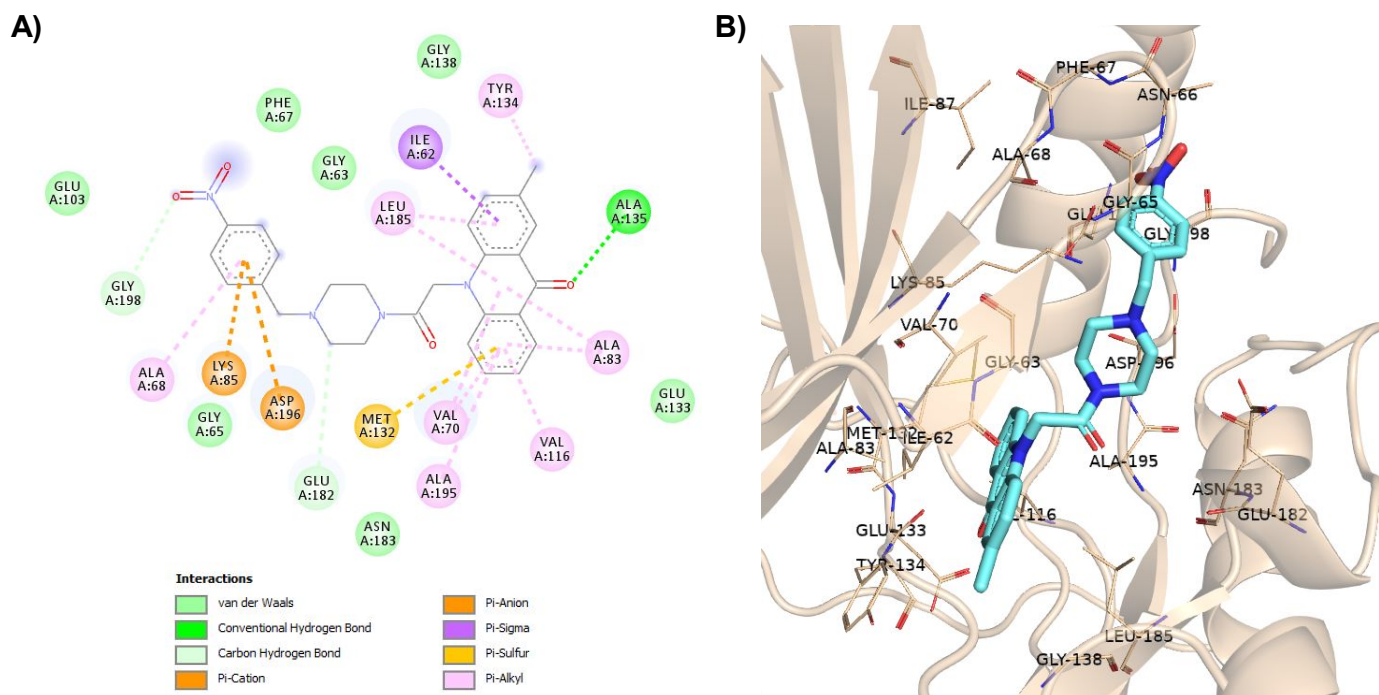

**Figure S10. (A)** 2D molecular docking model of compound **15c** in the active site of MARK4 (PDB code: 5ES1). **(B)** 3D model of the interaction between compound **15c** in the active site of MARK4 (BIOVIA Discovery Studio).

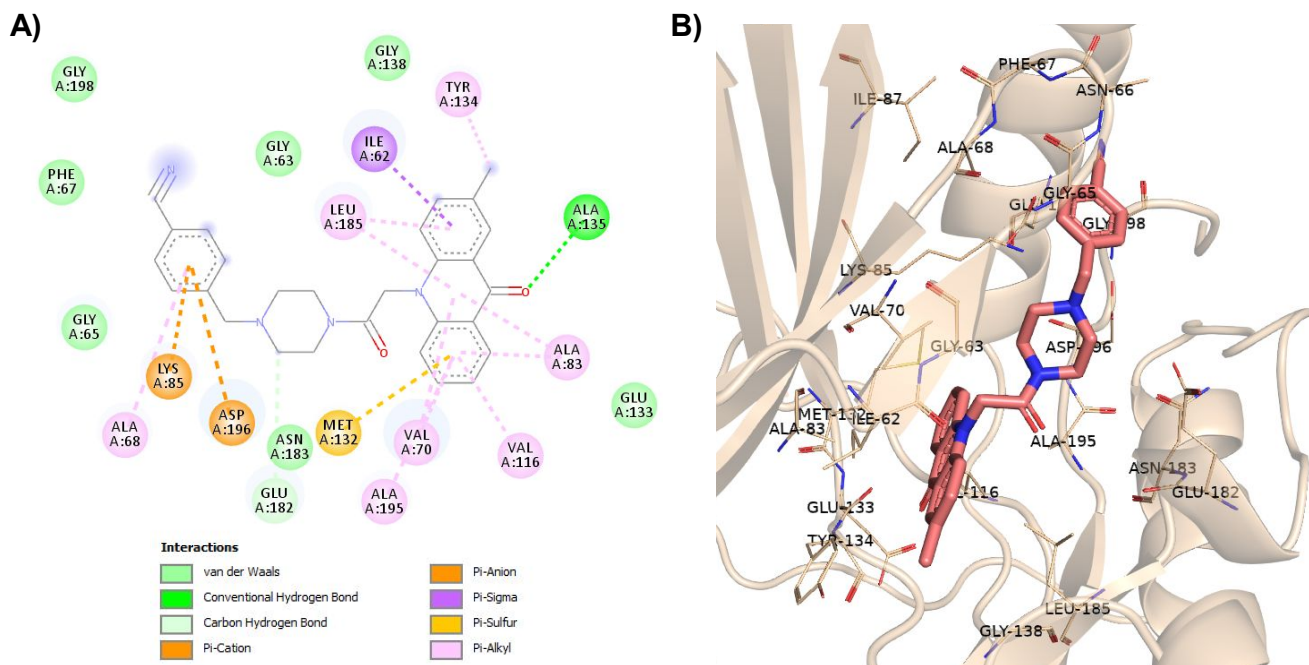

**Figure S11. (A)** 2D molecular docking model of compound **15d** in the active site of MARK4 (PDB code: 5ES1). **(B)** 3D model of the interaction between compound **15d** in the active site of MARK4 (BIOVIA Discovery Studio).

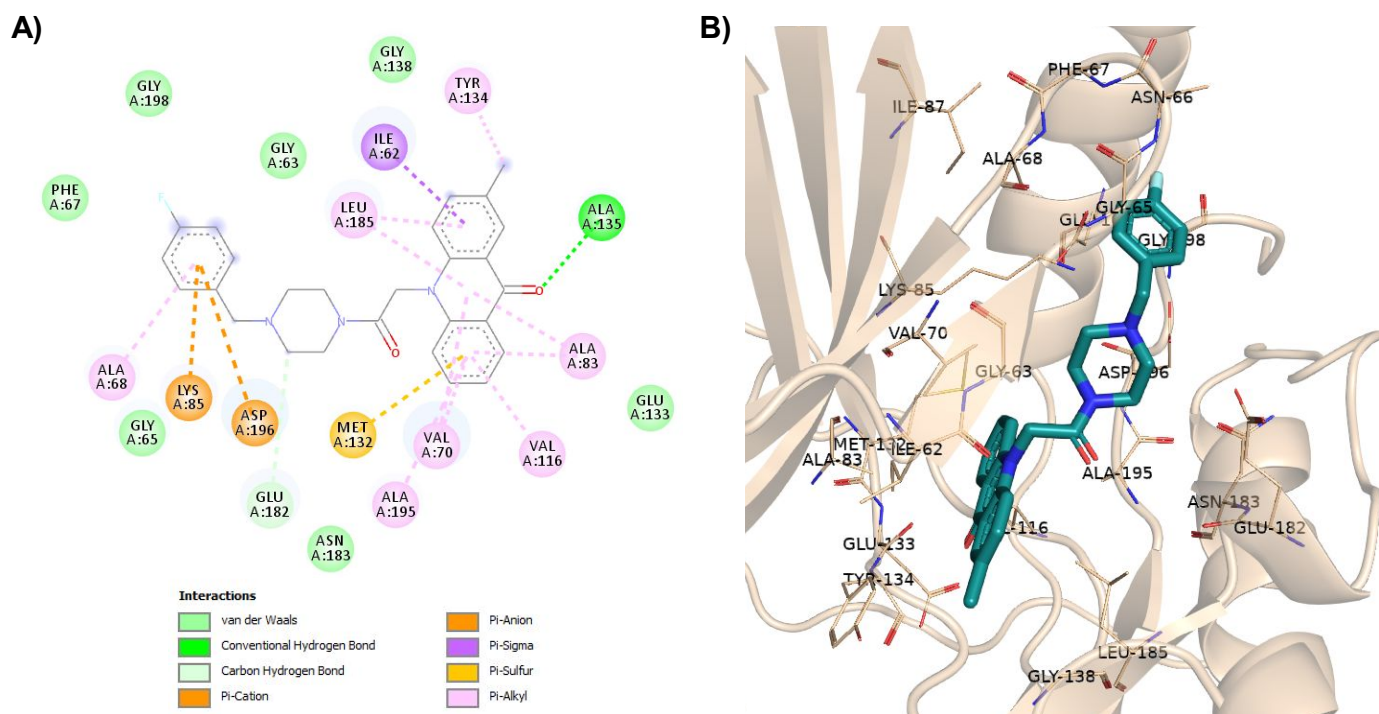

**Figure S12. (A)** 2D molecular docking model of compound **15e** in the active site of MARK4 (PDB code: 5ES1). **(B)** 3D model of the interaction between compound **15e** in the active site of MARK4 (BIOVIA Discovery Studio).

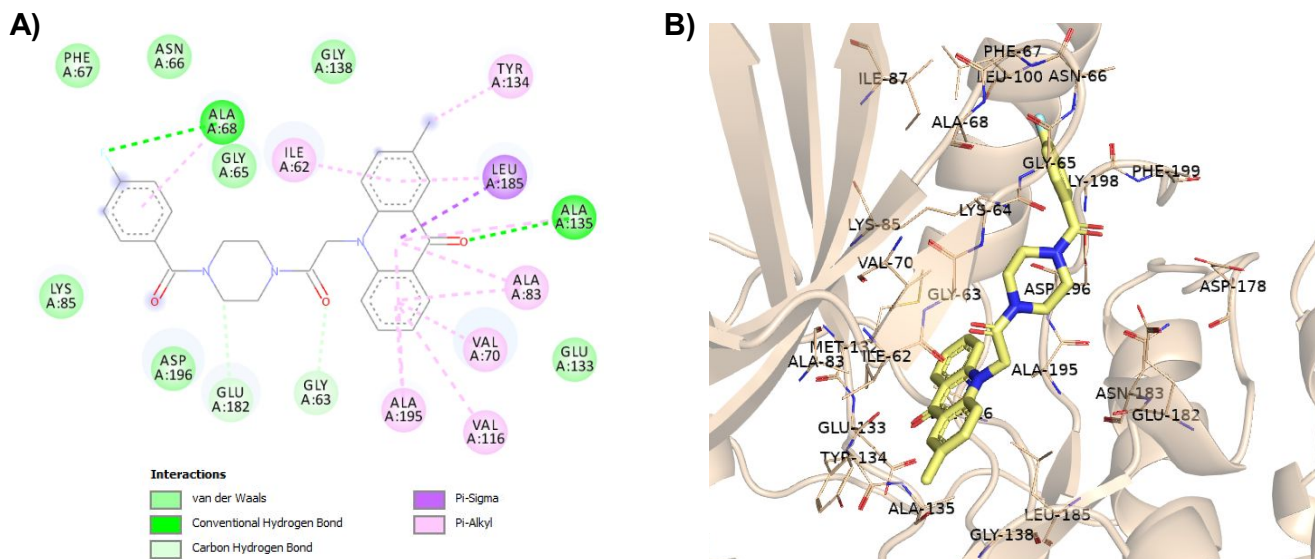

**Figure S13. (A)** 2D molecular docking model of compound **16c** in the active site of MARK4 (PDB code: 5ES1). **(B)** 3D model of the interaction between compound **16c** in the active site of MARK4 (BIOVIA Discovery Studio).

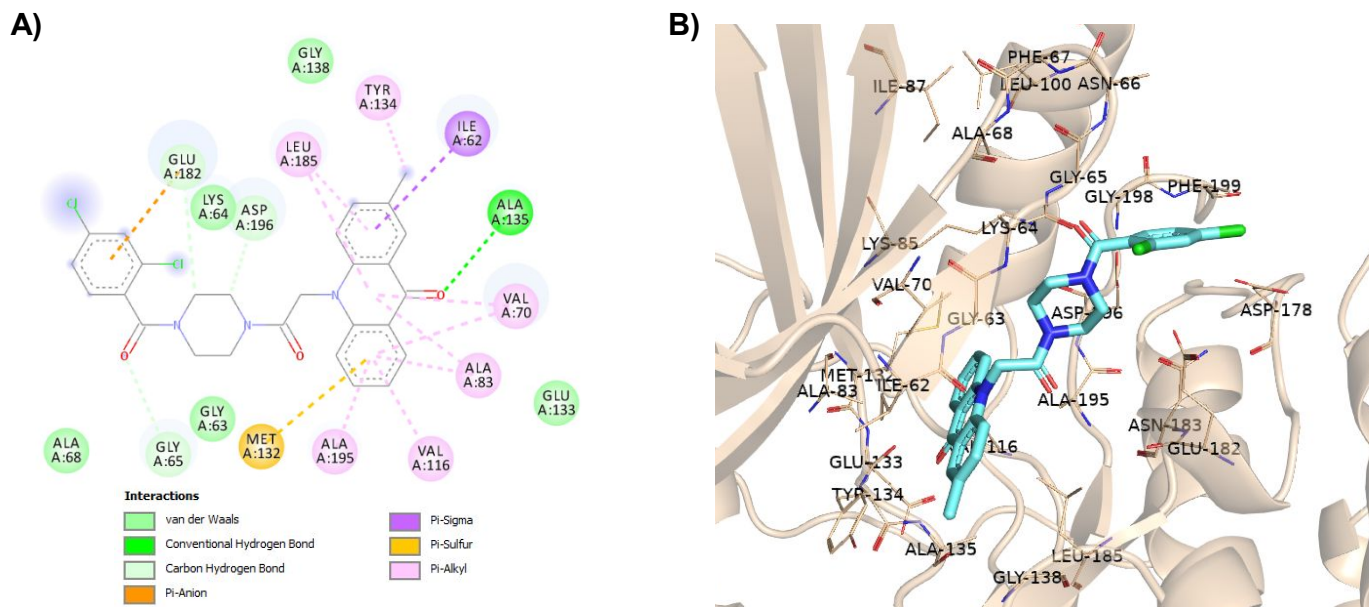

**Figure S14. (A)** 2D molecular docking model of compound **16d** in the active site of MARK4 (PDB code: 5ES1). **(B)** 3D model of the interaction between compound **16d** in the active site of MARK4 (BIOVIA Discovery Studio).

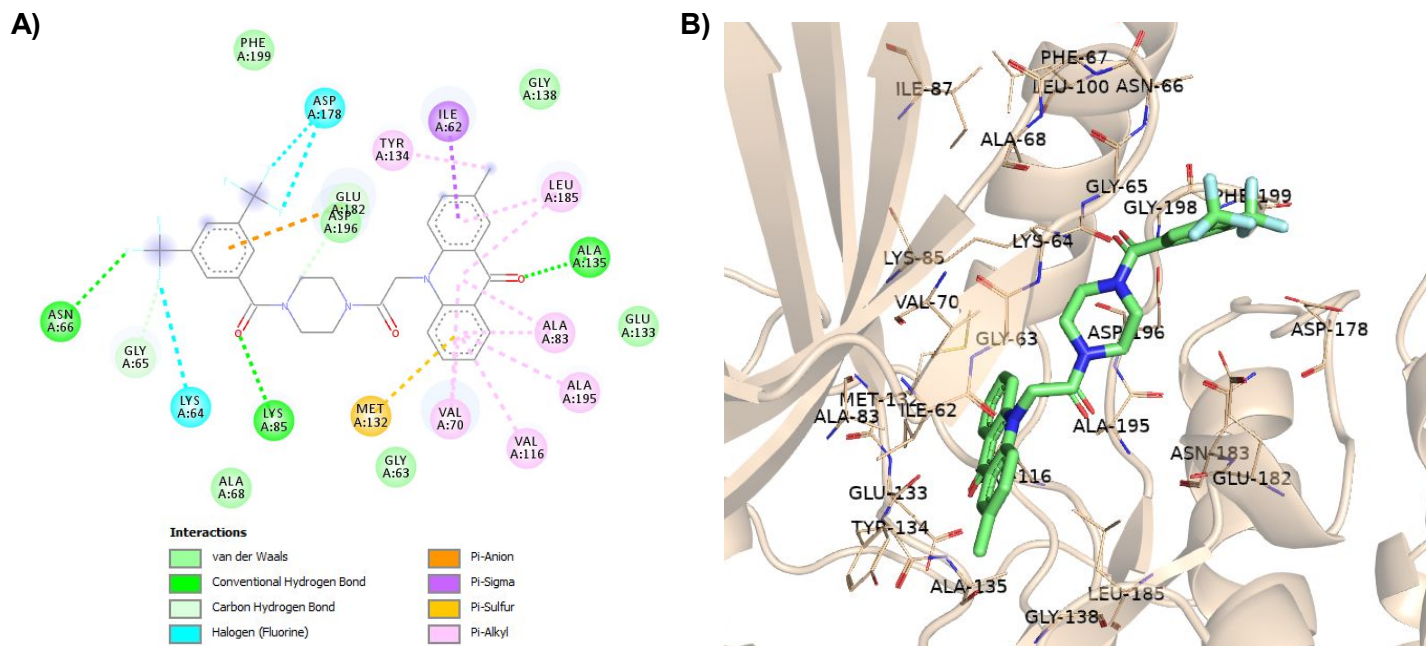

**Figure S15. (A)** 2D molecular docking model of compound **16e** in the active site of MARK4 (PDB code: 5ES1). **(B)** 3D model of the interaction between compound **16e** in the active site of MARK4 (BIOVIA Discovery Studio).

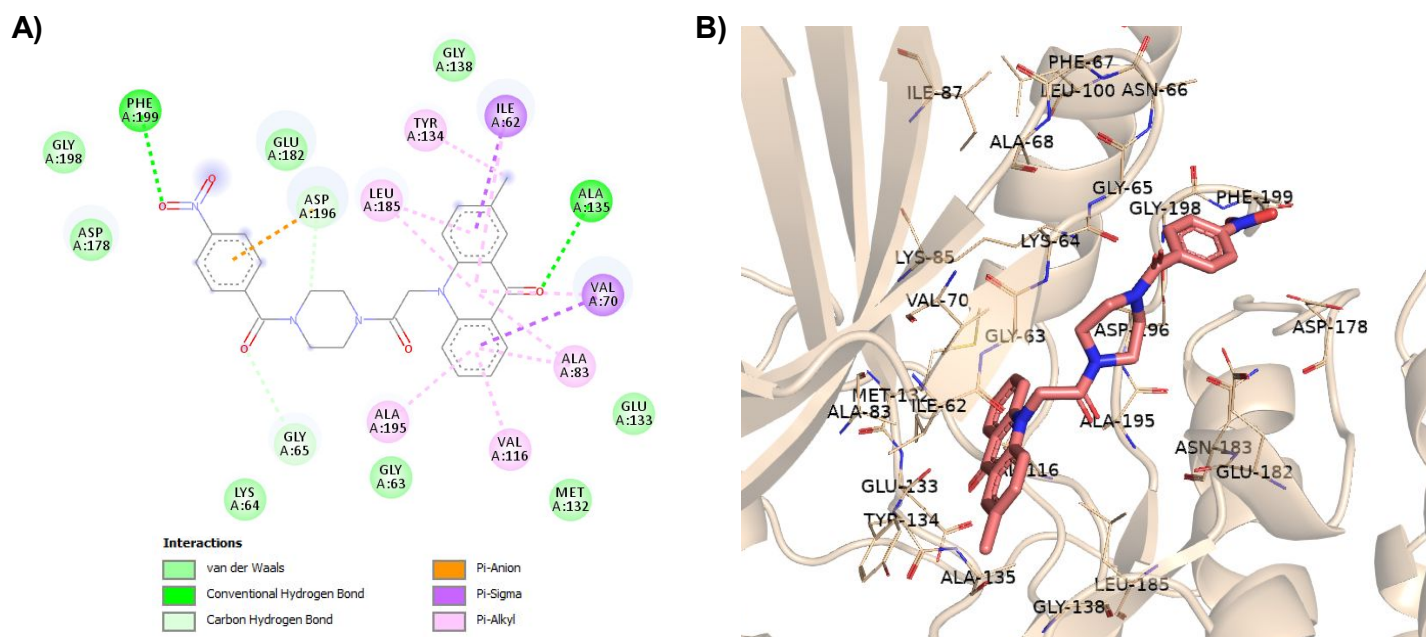

**Figure S16. (A)** 2D molecular docking model of compound **16f** in the active site of MARK4 (PDB code: 5ES1). **(B)** 3D model of the interaction between compound **16f** in the active site of MARK4 (BIOVIA Discovery Studio).

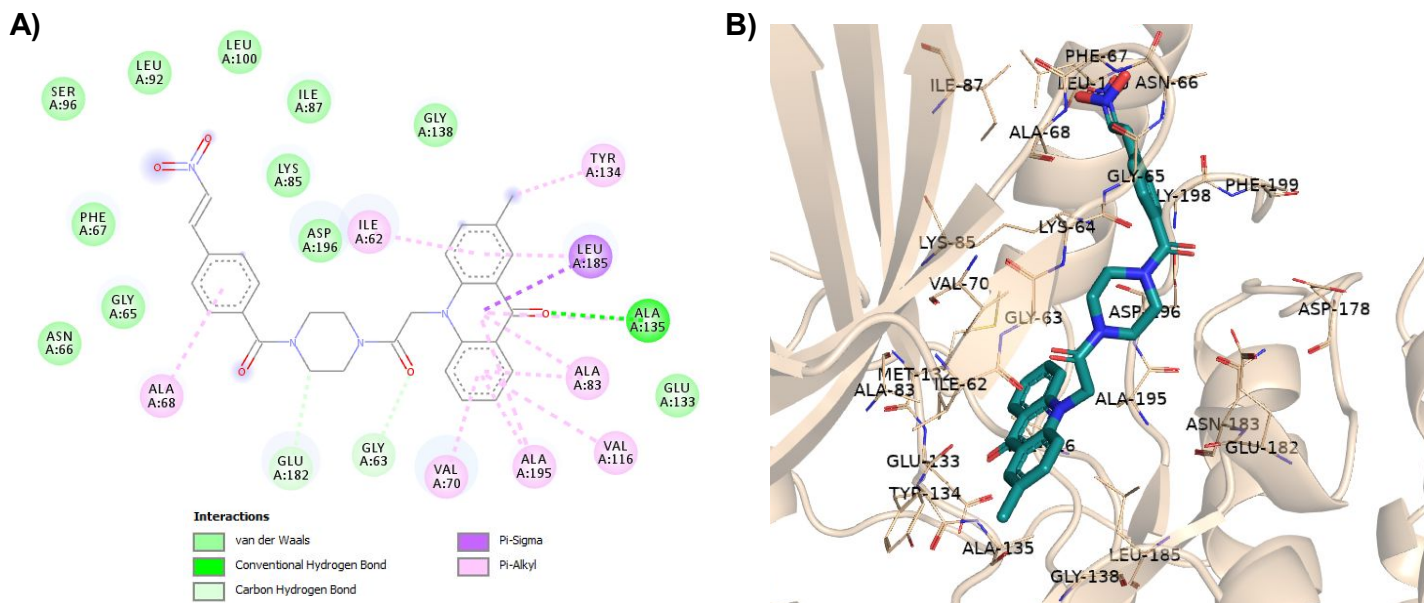

**Figure S17. (A)** 2D molecular docking model of compound **16g** in the active site of MARK4 (PDB code: 5ES1). **(B)** 3D model of the interaction between compound **16g** in the active site of MARK4 (BIOVIA Discovery Studio).

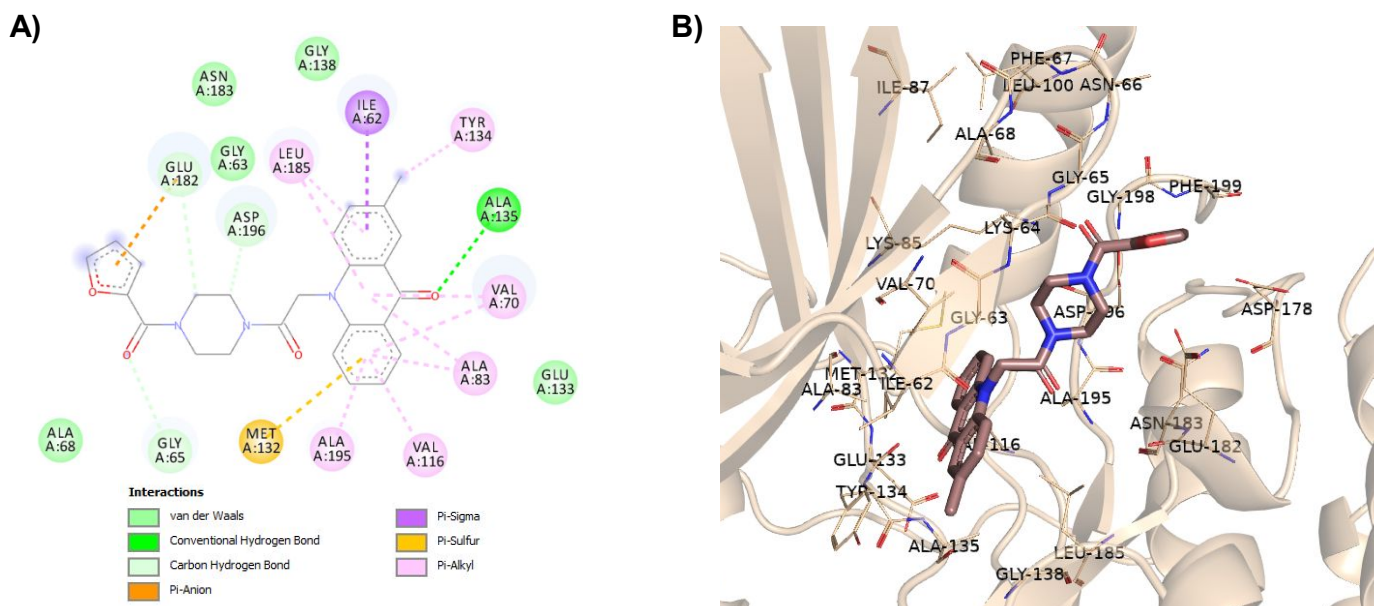

**Figure S18. (A)** 2D molecular docking model of compound **16h** in the active site of MARK4 (PDB code: 5ES1). **(B)** 3D model of the interaction between compound **16h** in the active site of MARK4 (BIOVIA Discovery Studio).

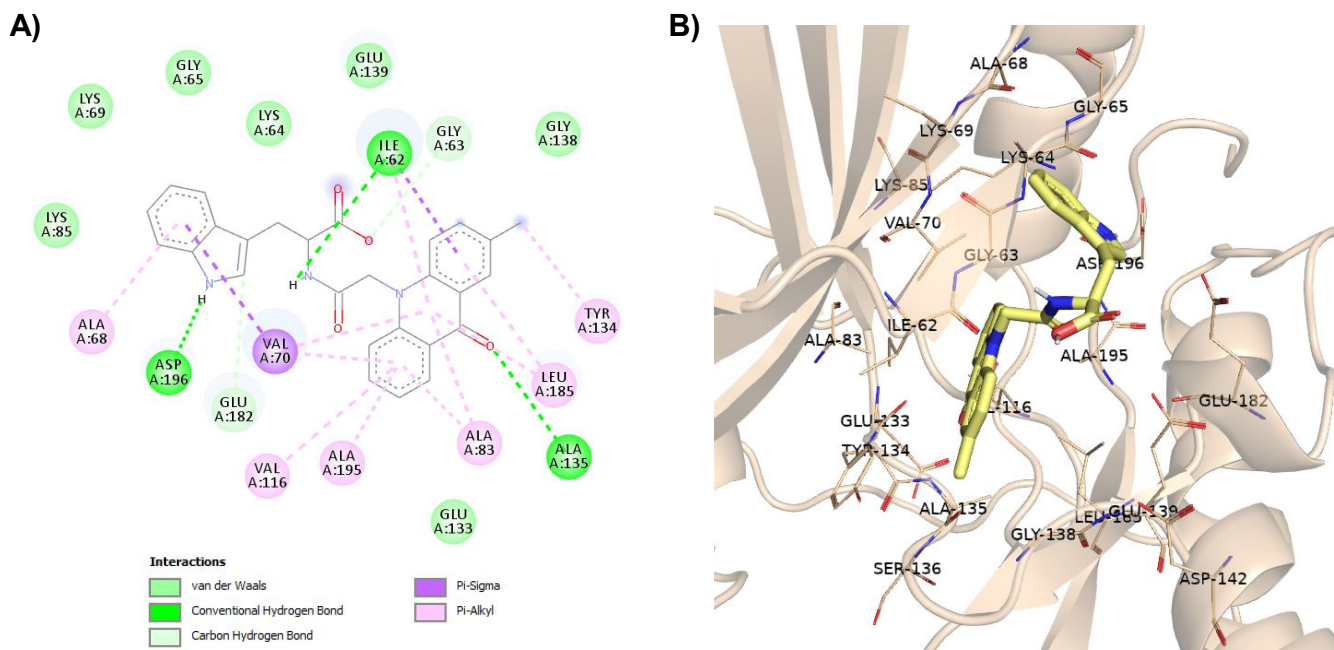

**Figure S19. (A)** 2D molecular docking model of compound **20** in the active site of MARK4 (PDB code: 5ES1). **(B)** 3D model of the interaction between compound **20** in the active site of MARK4 (BIOVIA Discovery Studio).

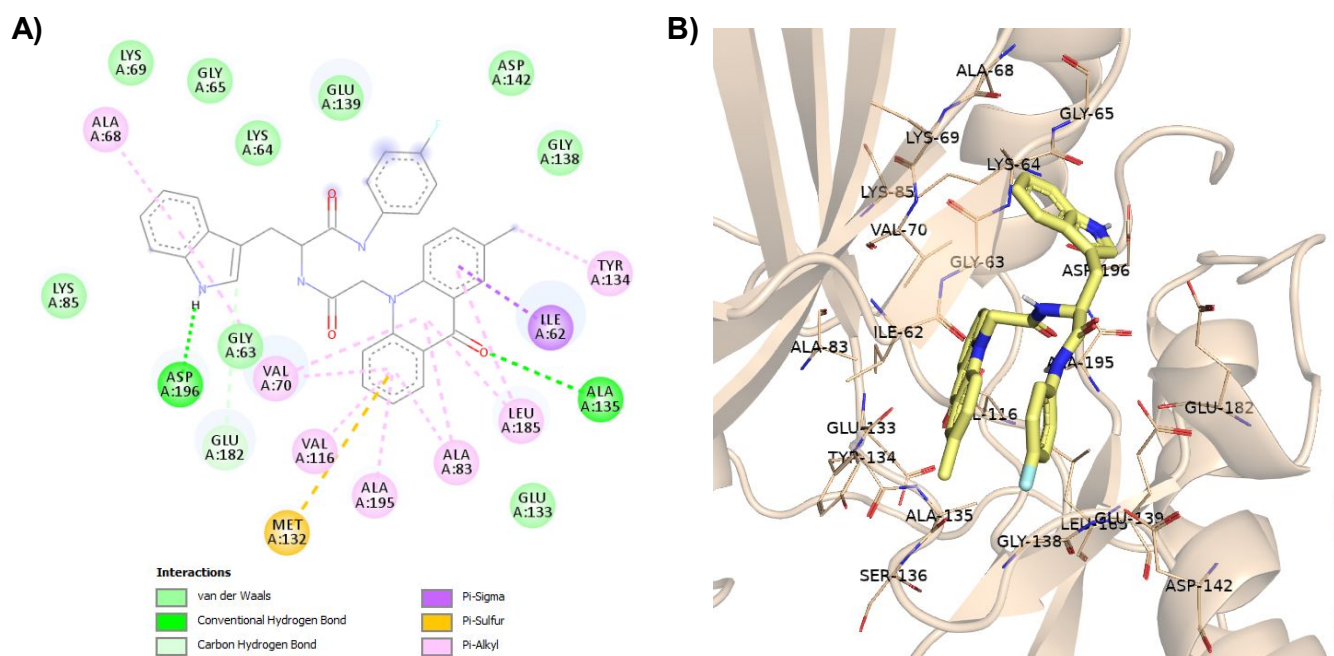

**Figure S20. (A)** 2D molecular docking model of compound **23b** in the active site of MARK4 (PDB code: 5ES1). **(B)** 3D model of the interaction between compound **23b** in the active site of MARK4 (BIOVIA Discovery Studio).

A)

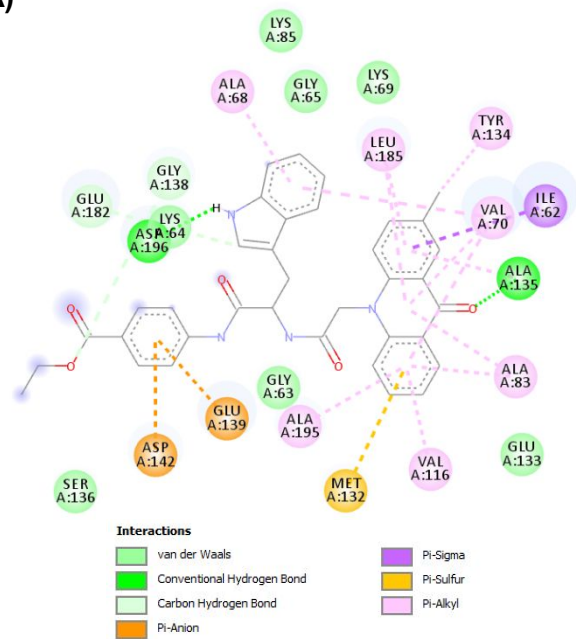

B)

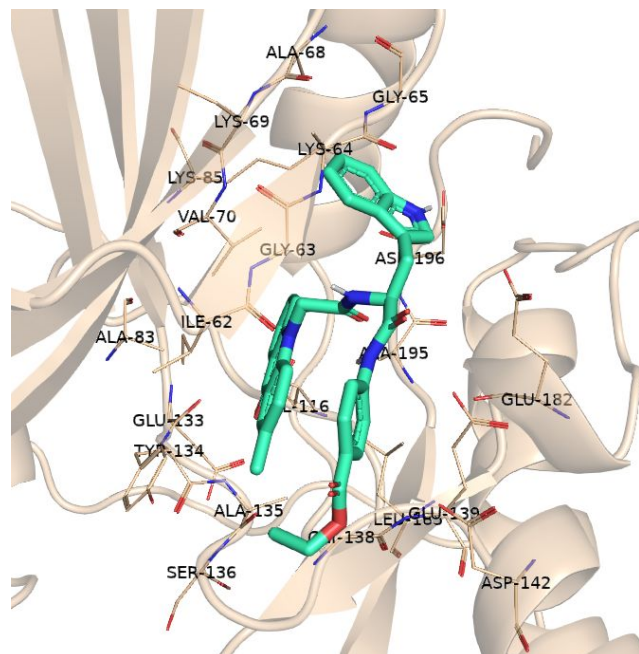

**Figure S21. (A)** 2D molecular docking model of compound **23d** in the active site of MARK4 (PDB code: 5E51). **(B)** 3D model of the interaction between compound **23d** in the active site of MARK4 (BIOVIA Discovery Studio).



acr04

8.61  
8.39  
8.29  
7.63  
7.61  
7.60  
7.46  
7.44  
7.36  
7.35  
7.33  
7.32  
7.30  
7.28  
7.20  
7.19

5.59

2.46

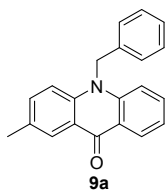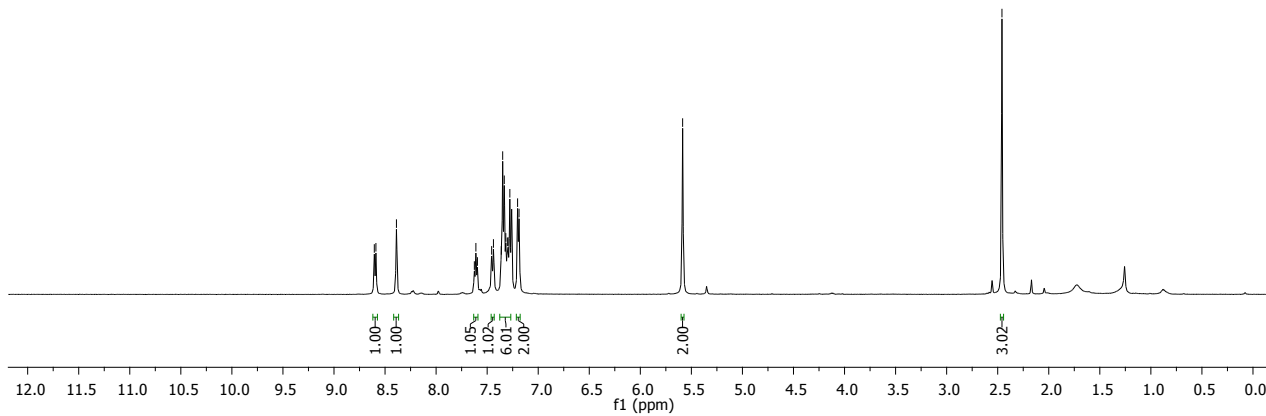

acr04 carbon

178.16

142.40  
140.62  
135.45  
133.86  
129.18  
127.79  
127.74  
127.08  
125.63  
115.13  
115.02

50.66

20.60

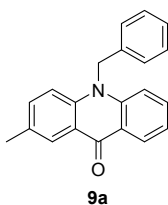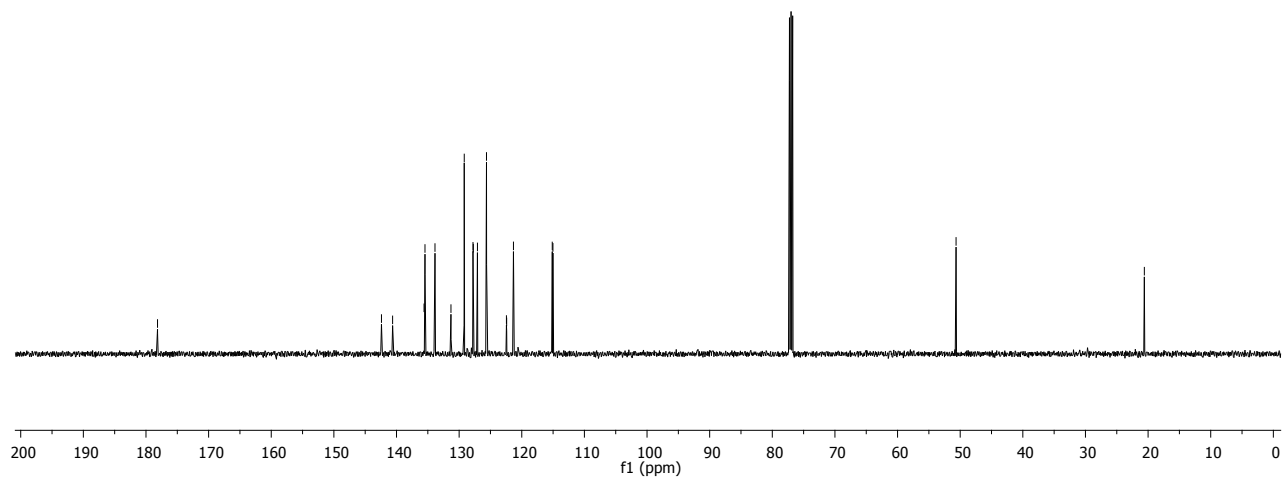

acr05

8.59  
8.59  
8.57  
8.57  
8.37  
7.80  
7.80  
7.58  
7.57  
7.57  
7.43  
7.43  
7.41  
7.41  
7.33  
7.32  
7.27  
7.24  
7.15  
7.13  
7.07  
7.06  
5.52

2.44  
2.33

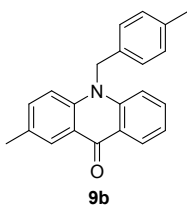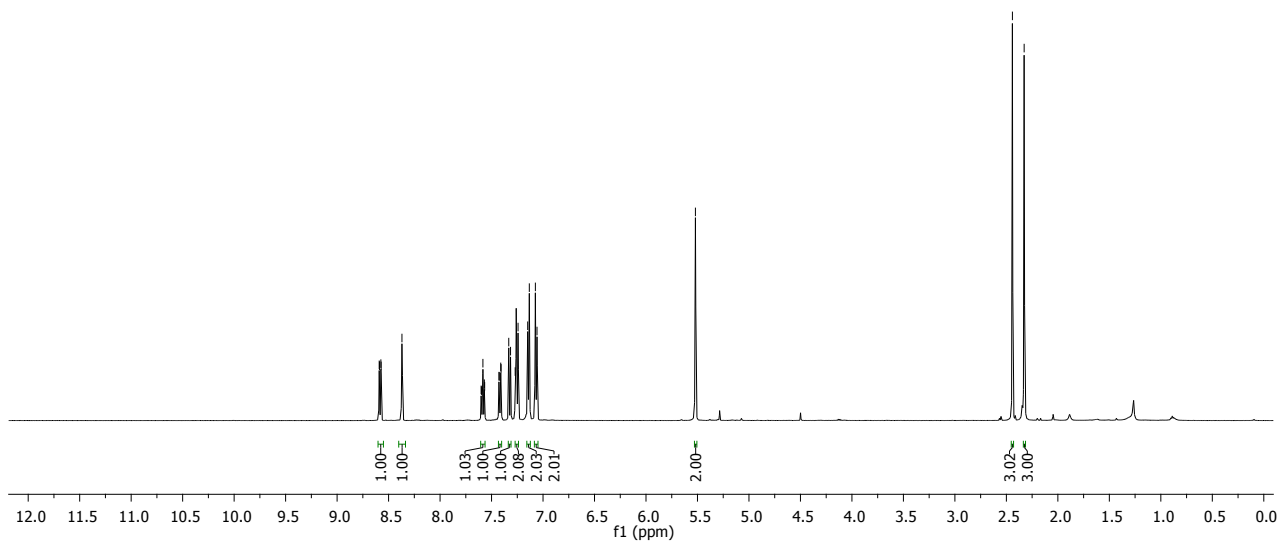

acr05 carbon

178.06

142.34  
140.36  
137.41  
135.35  
133.75  
132.44  
131.44  
128.79  
127.66  
126.93  
125.52  
122.36  
122.32  
121.19  
115.16  
115.04

50.38

21.02  
20.56

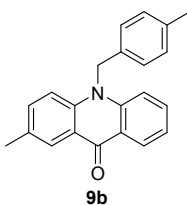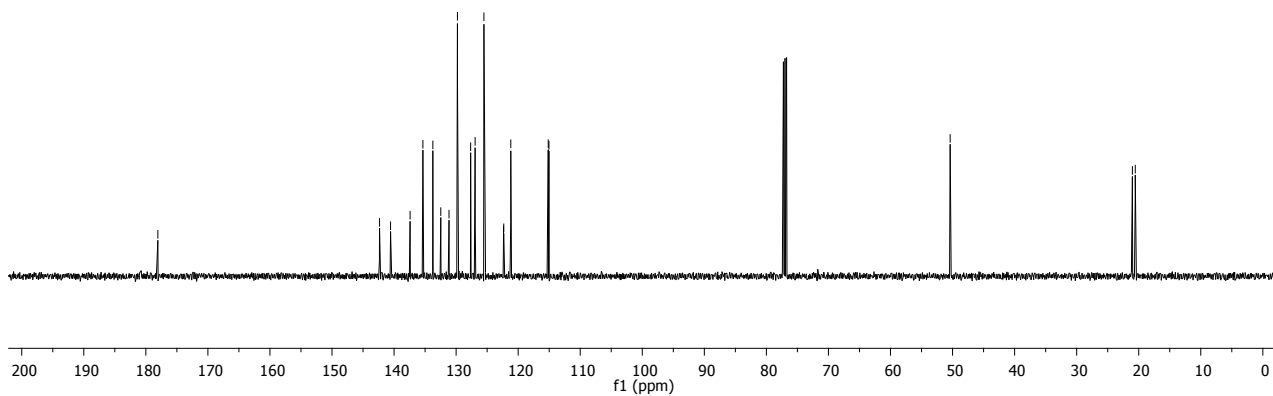

acr07

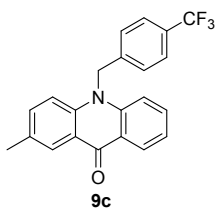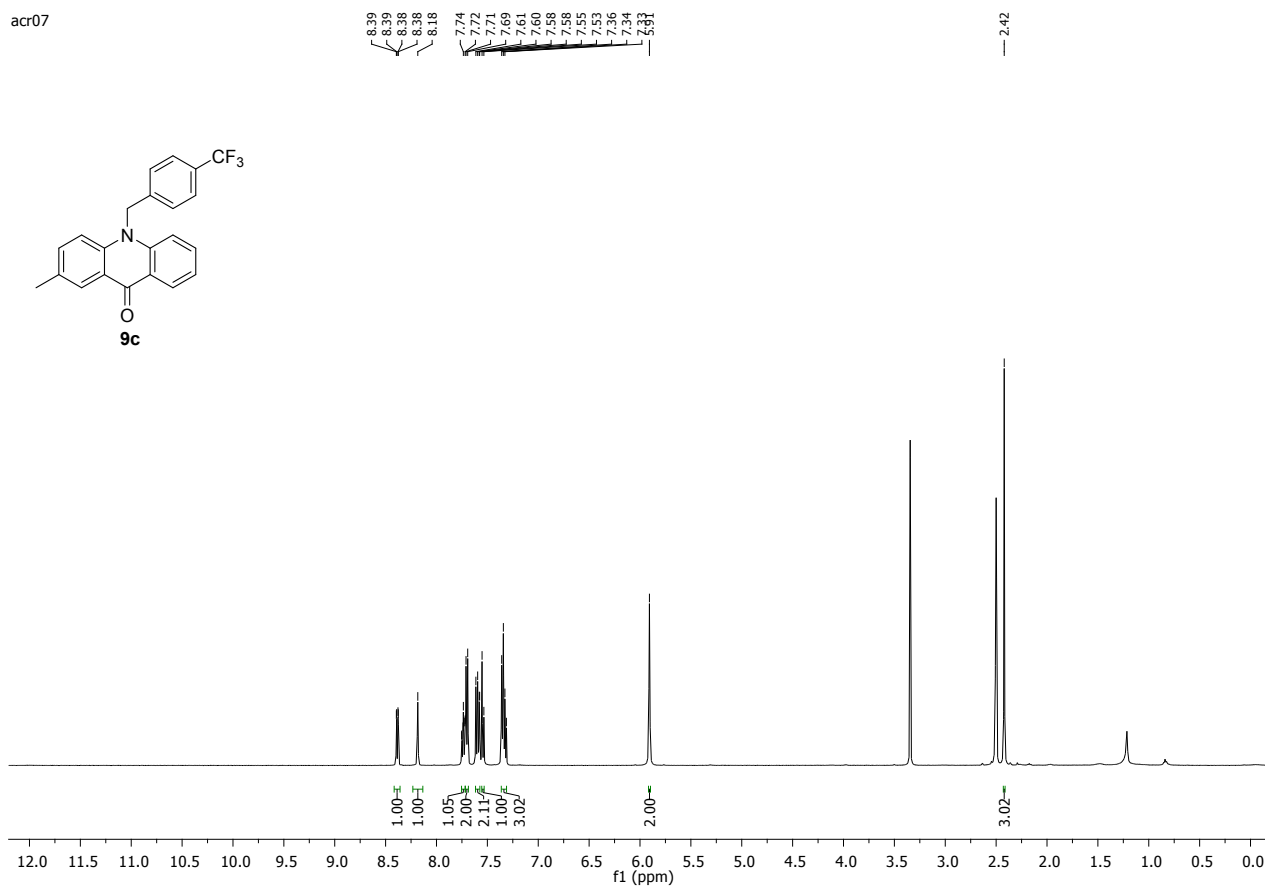

acr07 carbon

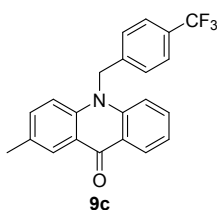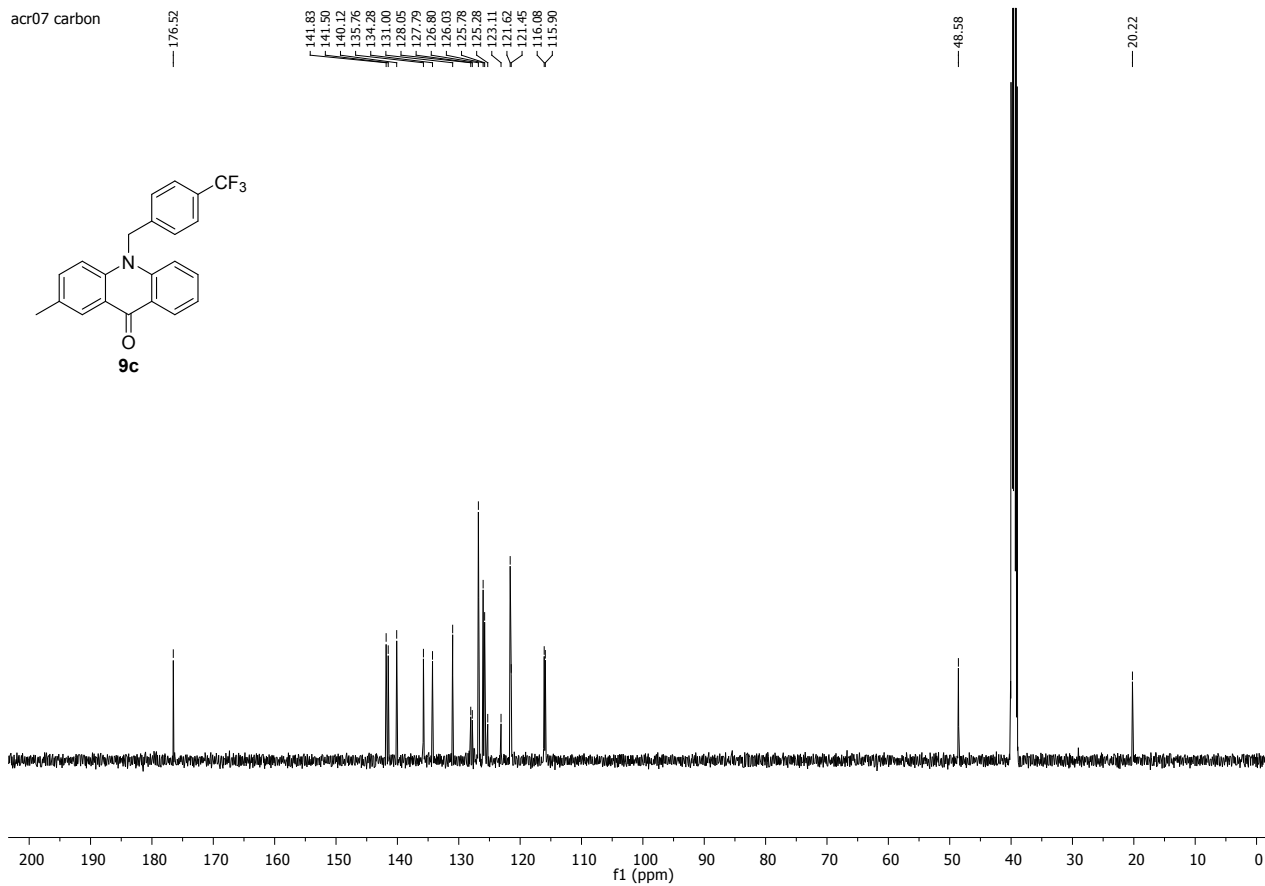

acr08

8.56  
8.55  
8.34  
7.60  
7.58  
7.57  
7.42  
7.40  
7.28  
7.25  
7.23  
7.21  
7.19  
7.13  
7.03  
7.01  
6.99

5.51

2.42

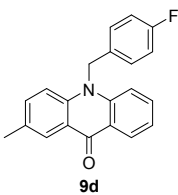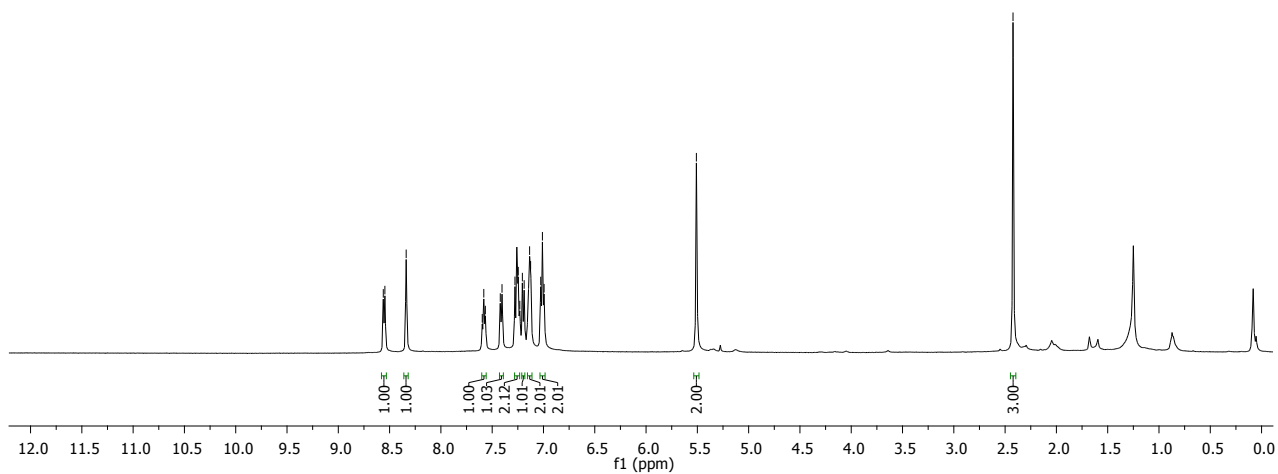

acr08 carbon

177.98

163.15  
161.19

142.14  
140.35  
133.75  
131.32  
131.19  
127.67  
126.98  
122.35  
122.32  
118.10  
115.94  
114.90  
114.70

49.91

20.62

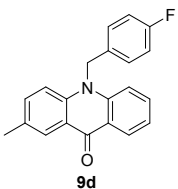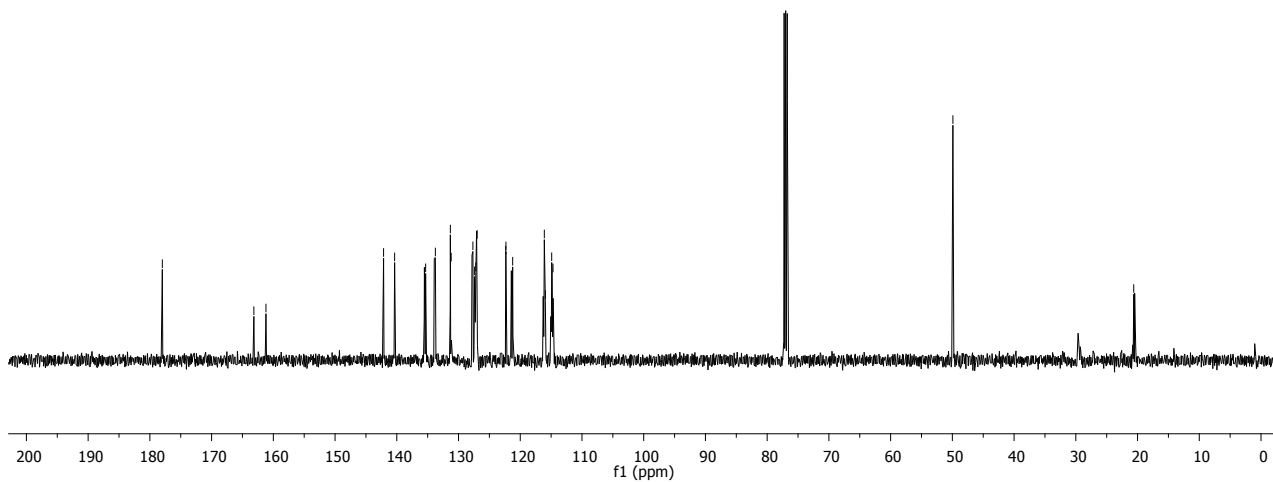

acr09

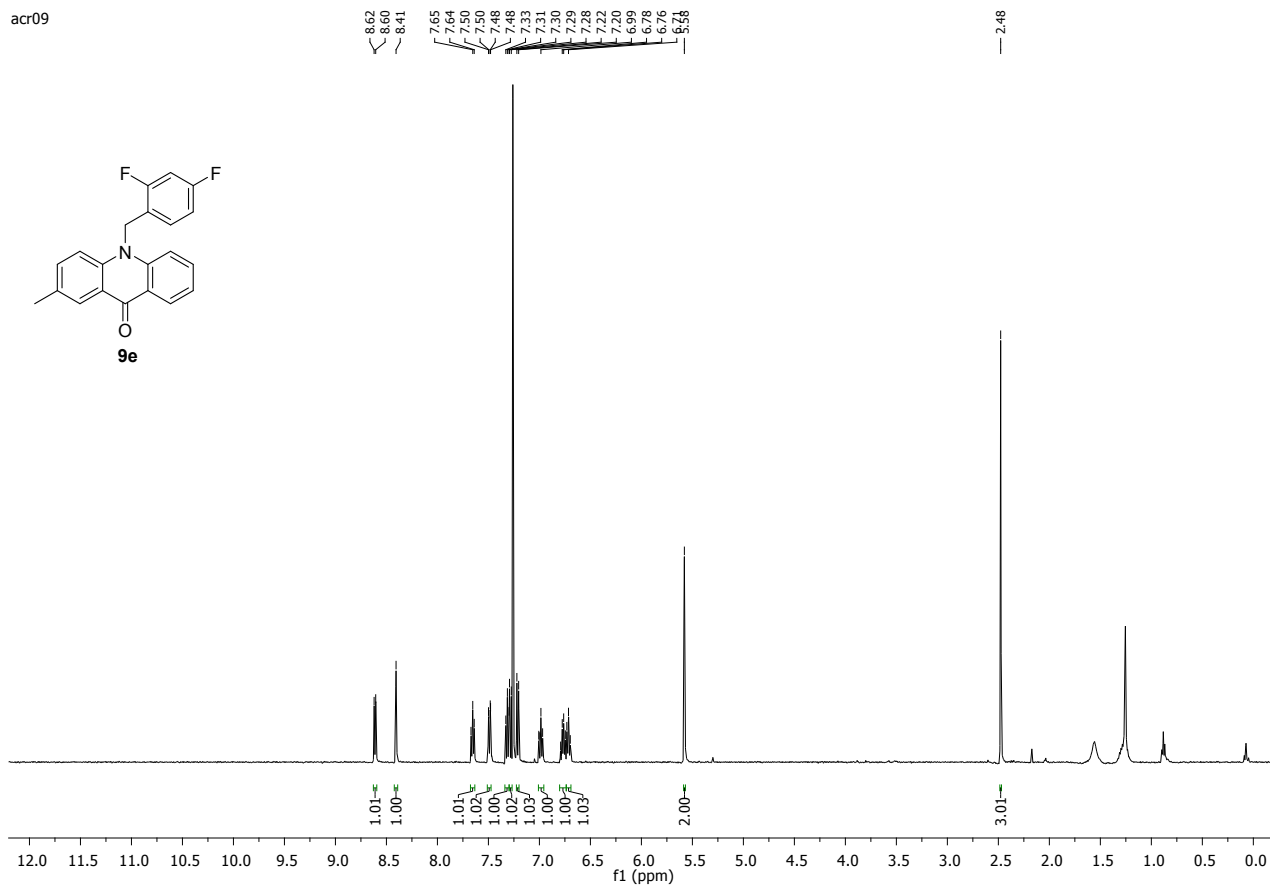

acr09 carbon

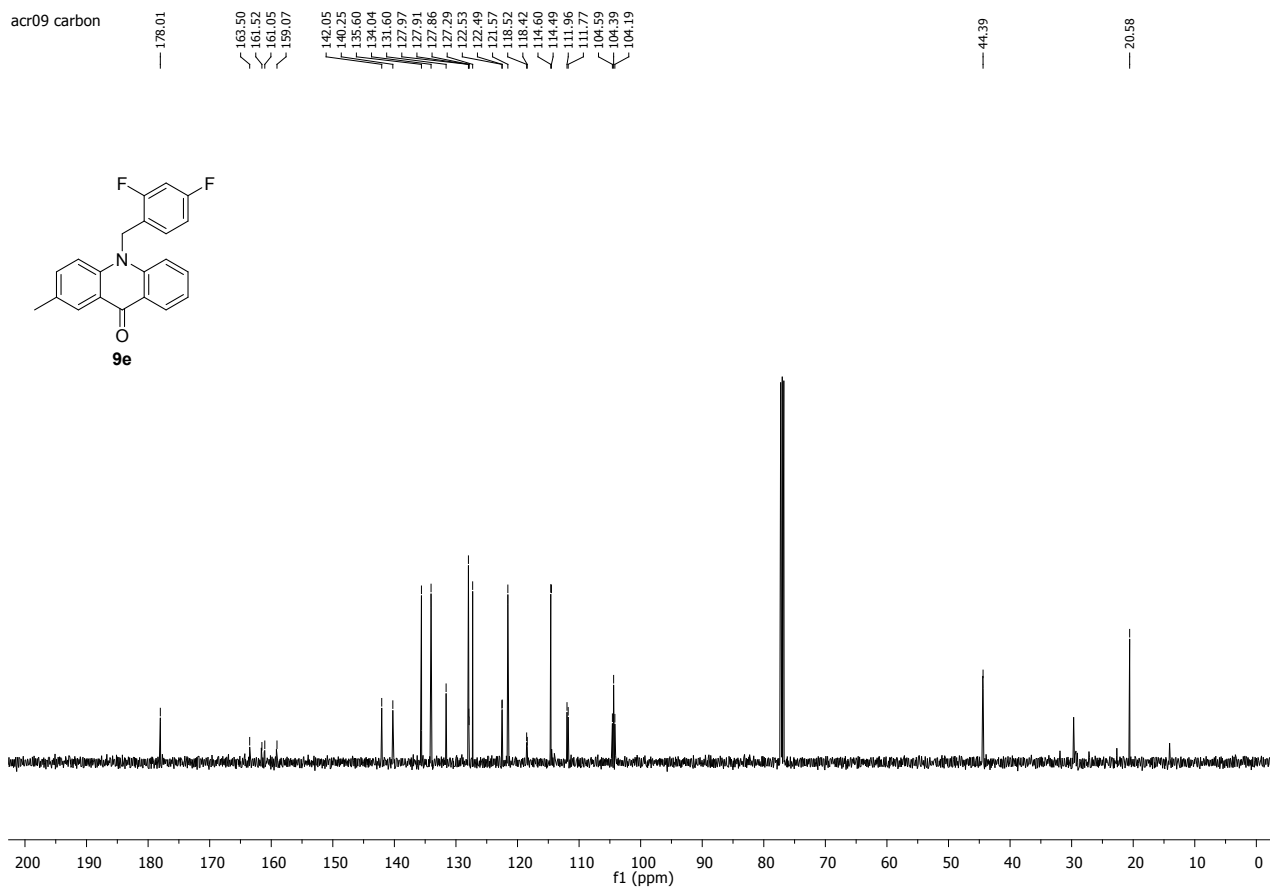

acr10

8.57 8.57 8.56 8.55 8.35 7.89 7.88 7.66 7.56 7.55 7.53 7.52 7.51 7.50 7.49 7.47 7.25 7.23 4.36 4.35 2.45 1.32 1.31 1.30 1.29 1.28 1.27 0.64 0.63 0.50 0.49 0.48 0.47

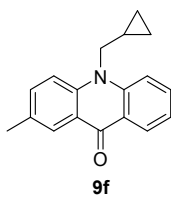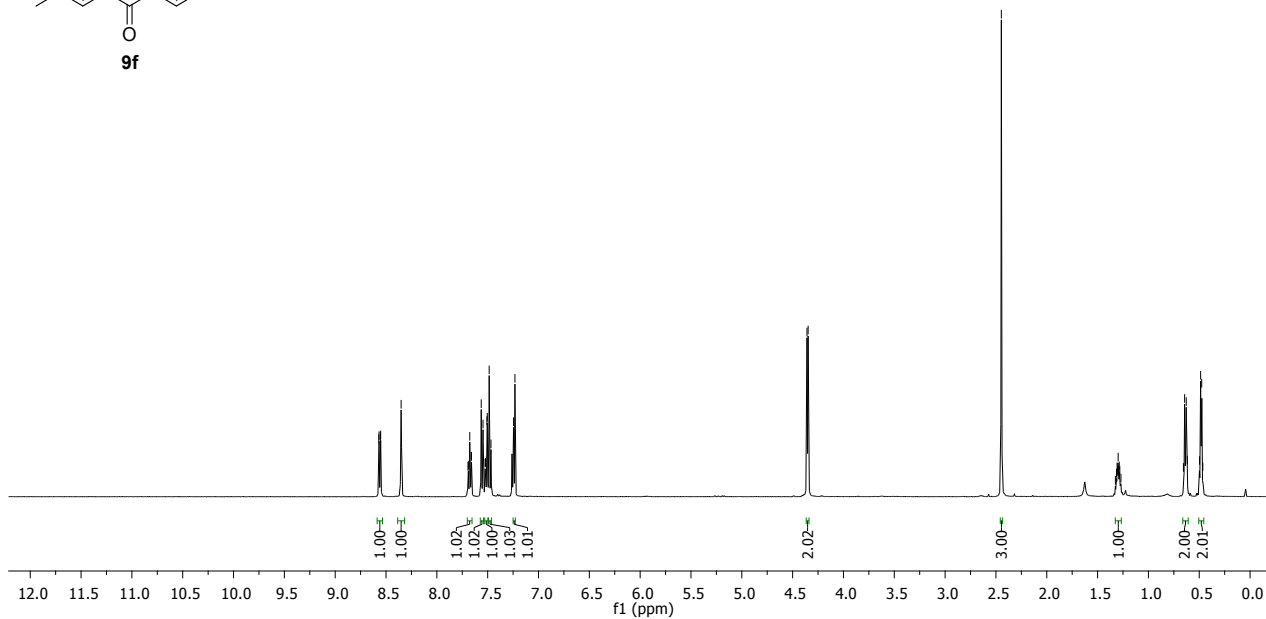

acr10 carbon

177.87 142.06 140.30 135.16 133.52 130.88 127.98 127.35 120.93 115.17 115.06 48.61 20.56 9.77 4.32

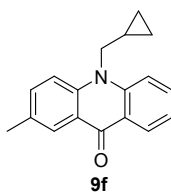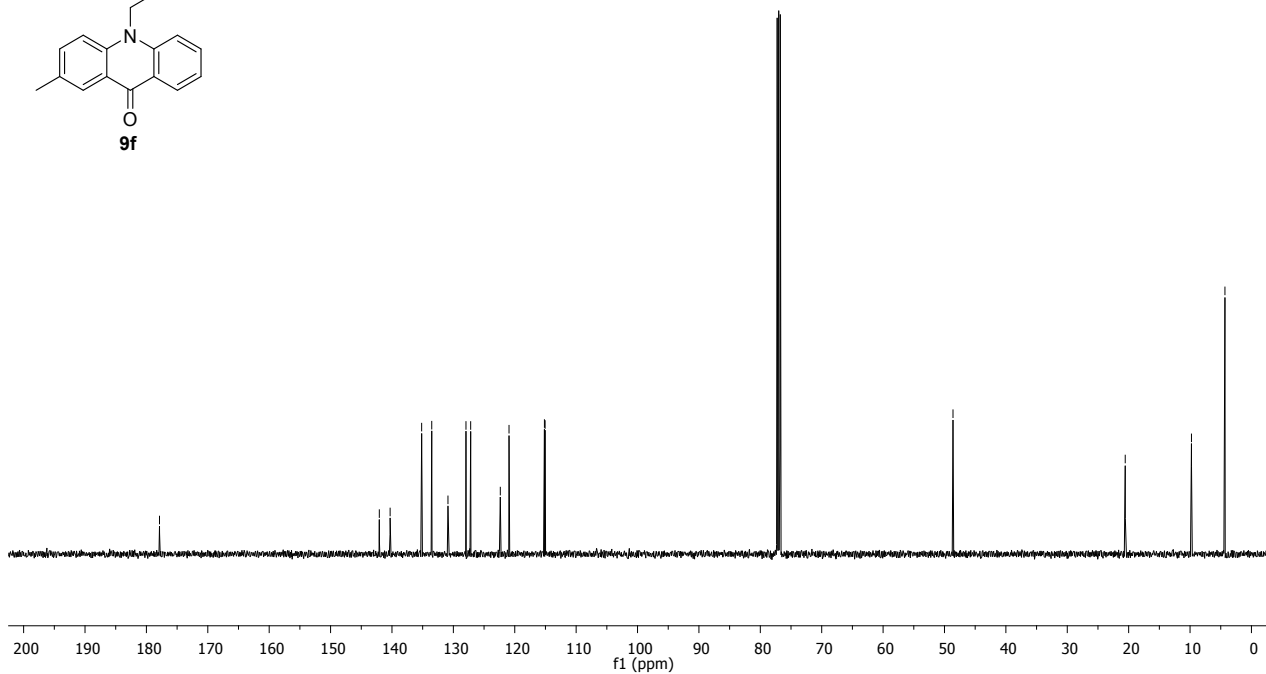

acr13

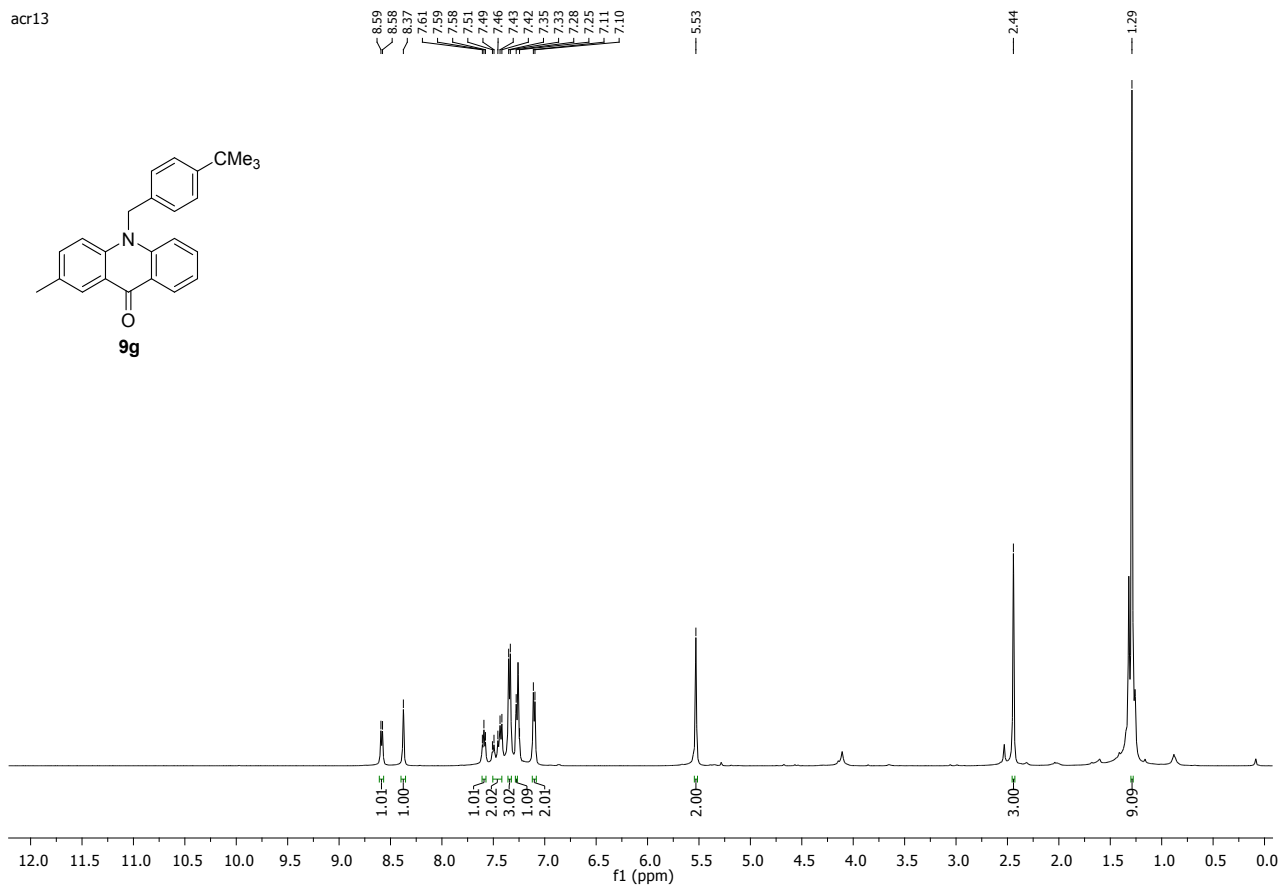

acr13 carbon

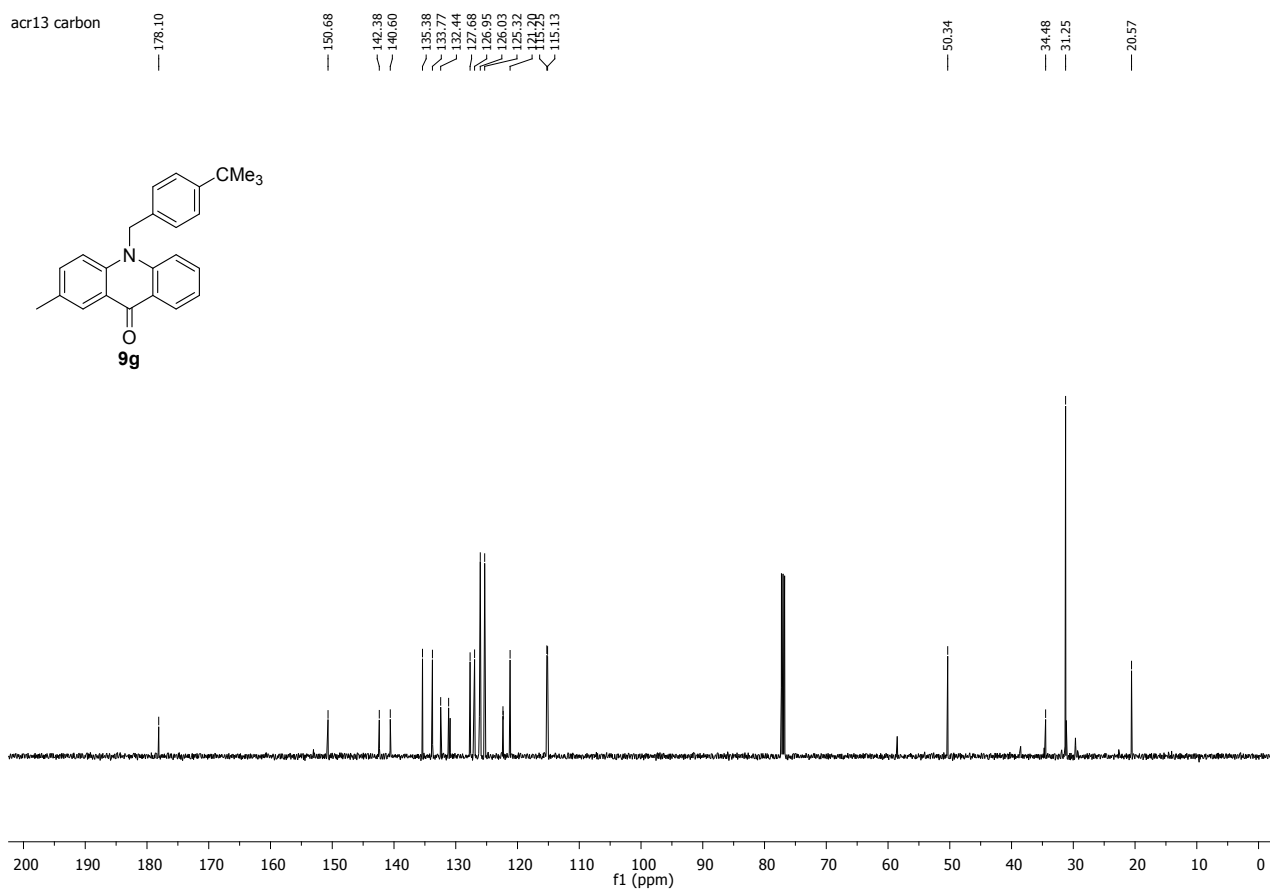

acr14

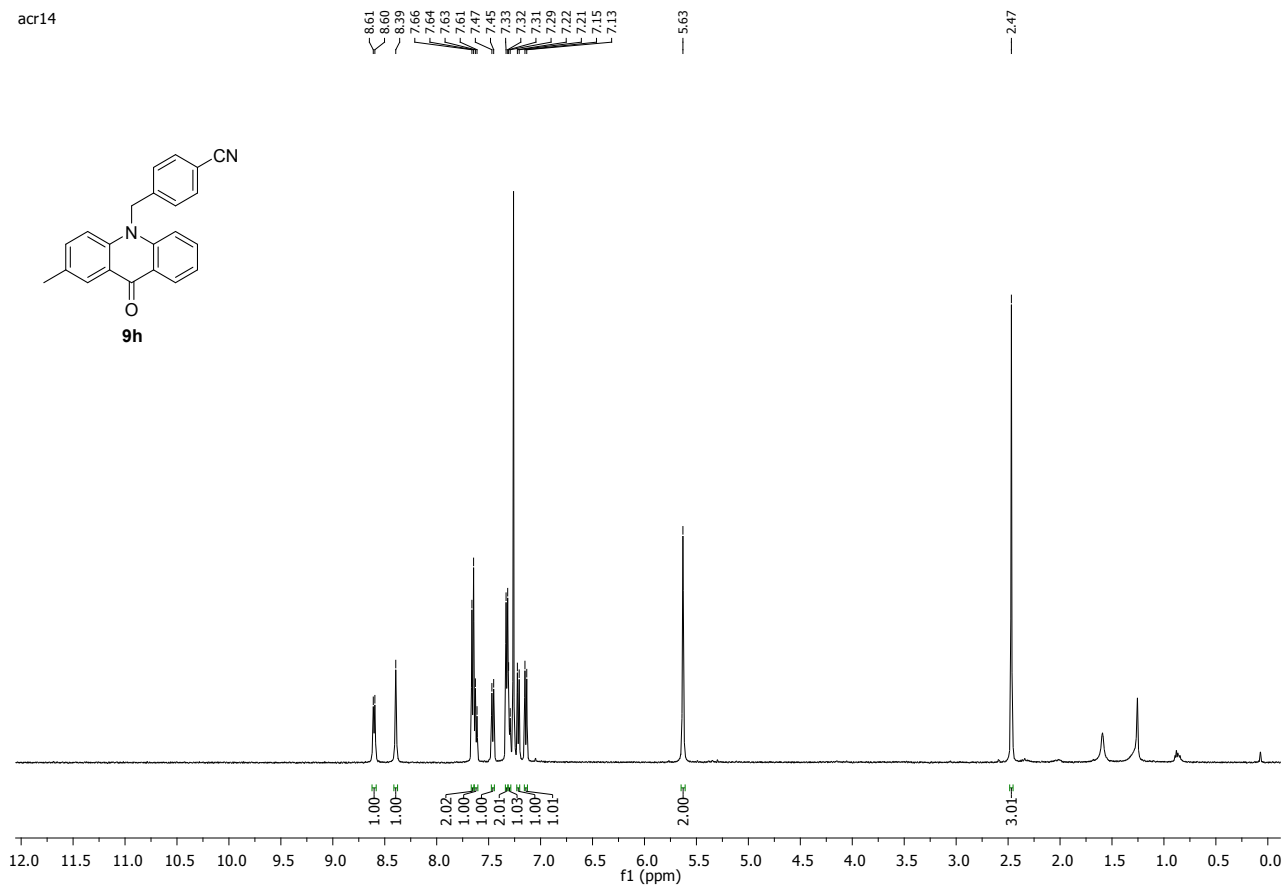

acr14 carbon

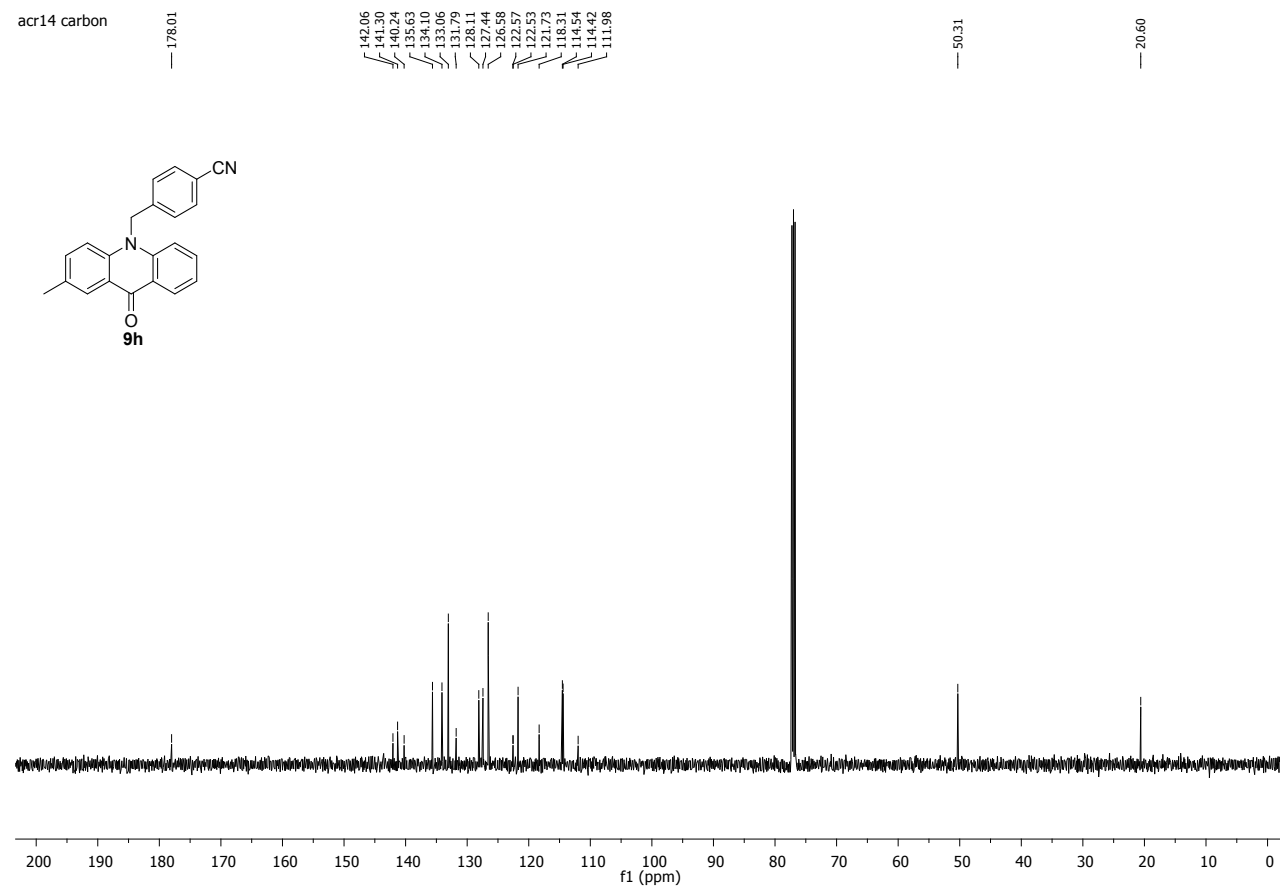



acr15

8.62  
8.60  
8.40  
8.23  
8.21  
7.65  
7.63  
7.62  
7.48  
7.46  
7.40  
7.38  
7.33  
7.22  
7.20  
7.16  
7.14  
5.67

2.47

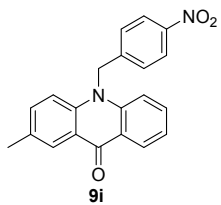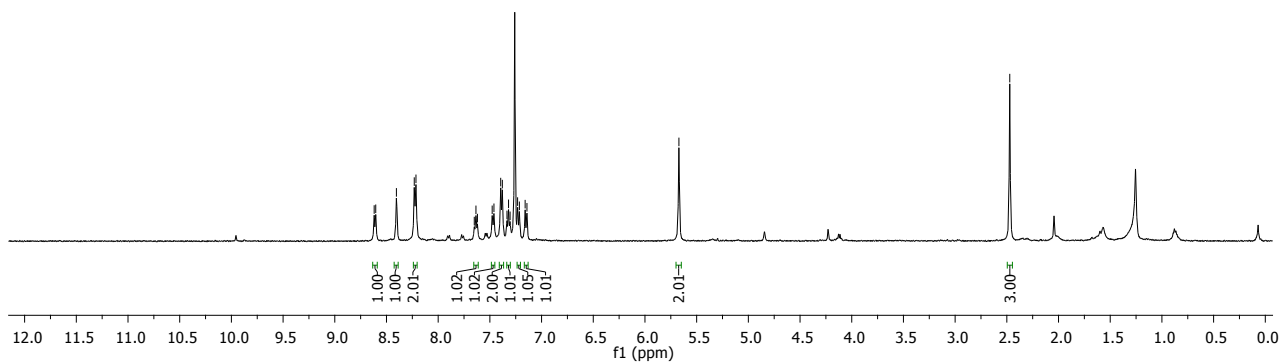

acr15 carbon

178.02

147.71  
143.28  
142.03  
140.21  
138.63  
135.62  
134.10  
131.67  
129.47  
127.68  
124.94  
122.56  
121.75  
114.44  
114.33

50.19

20.56

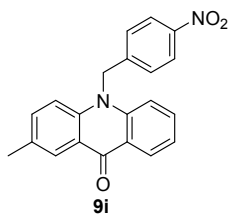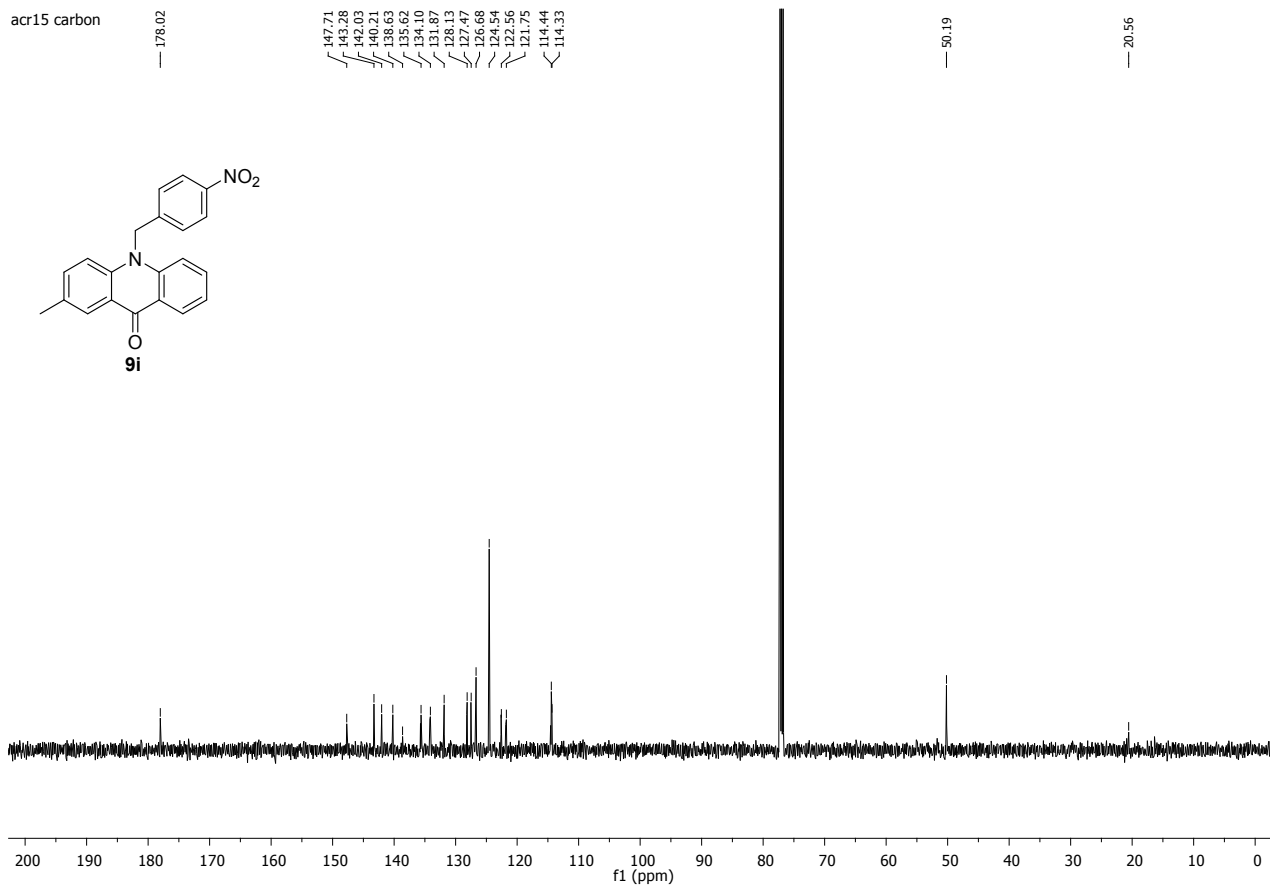

acr16

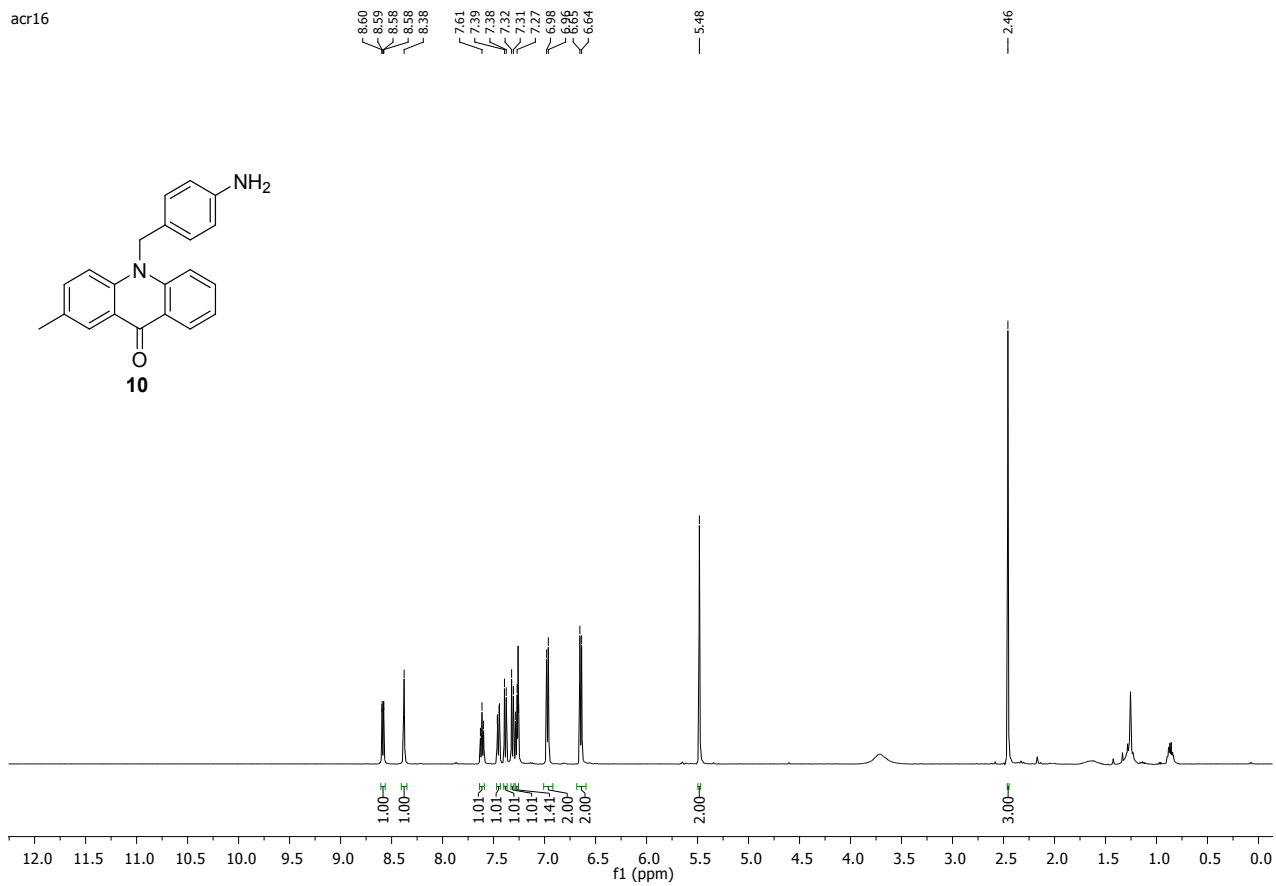

acr16 carbon

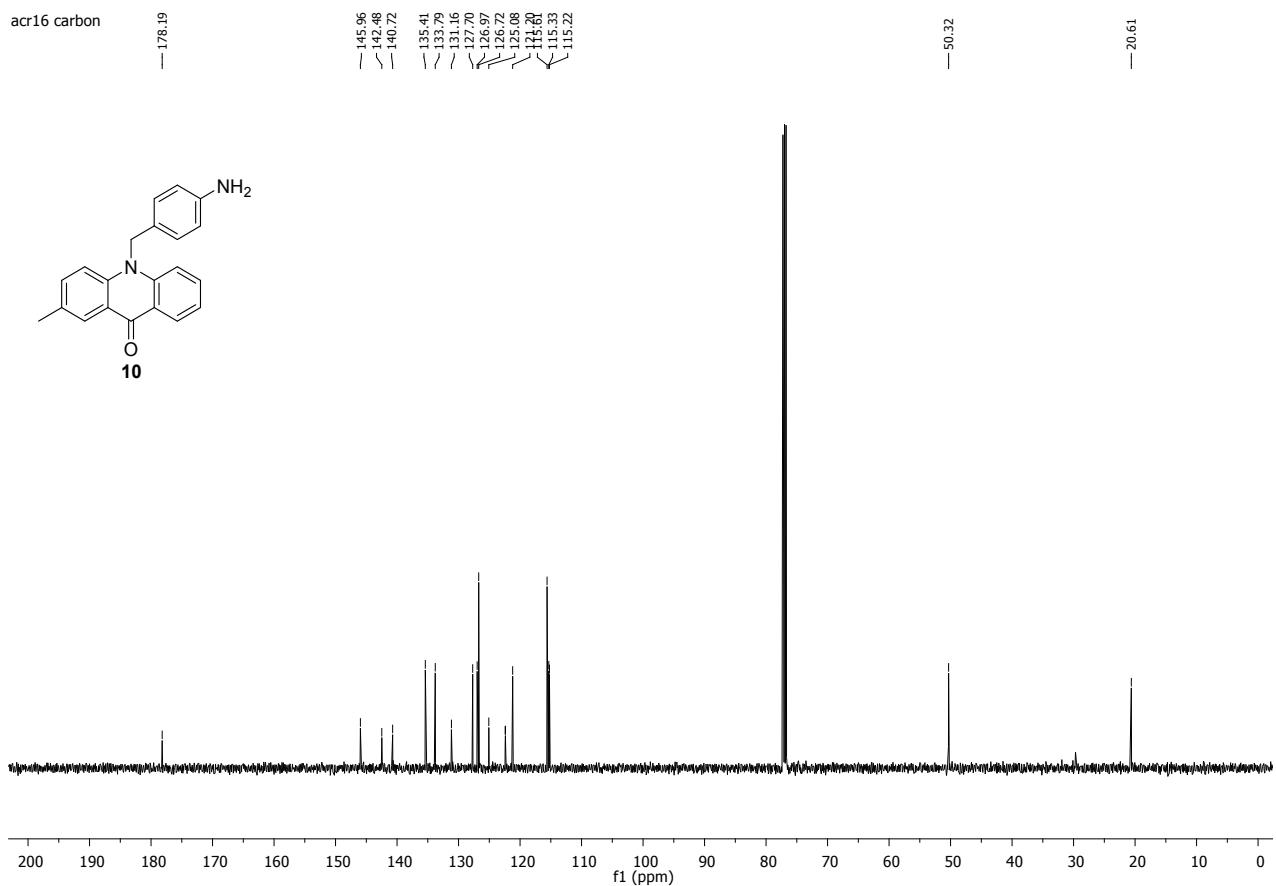

mv61

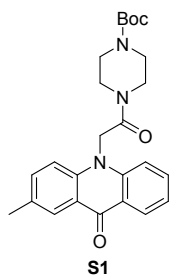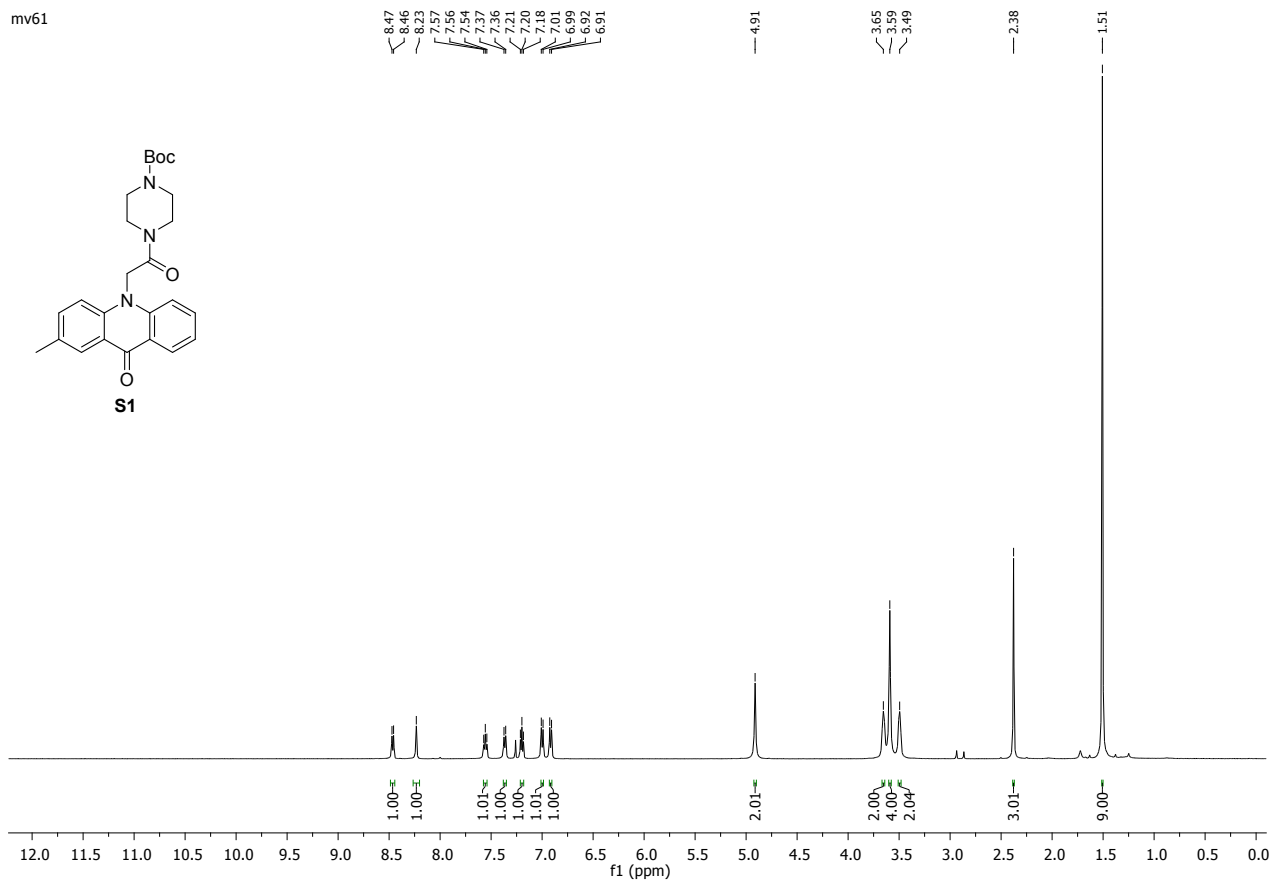

mv61 carbon

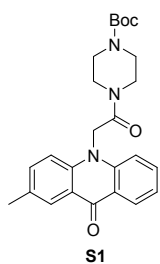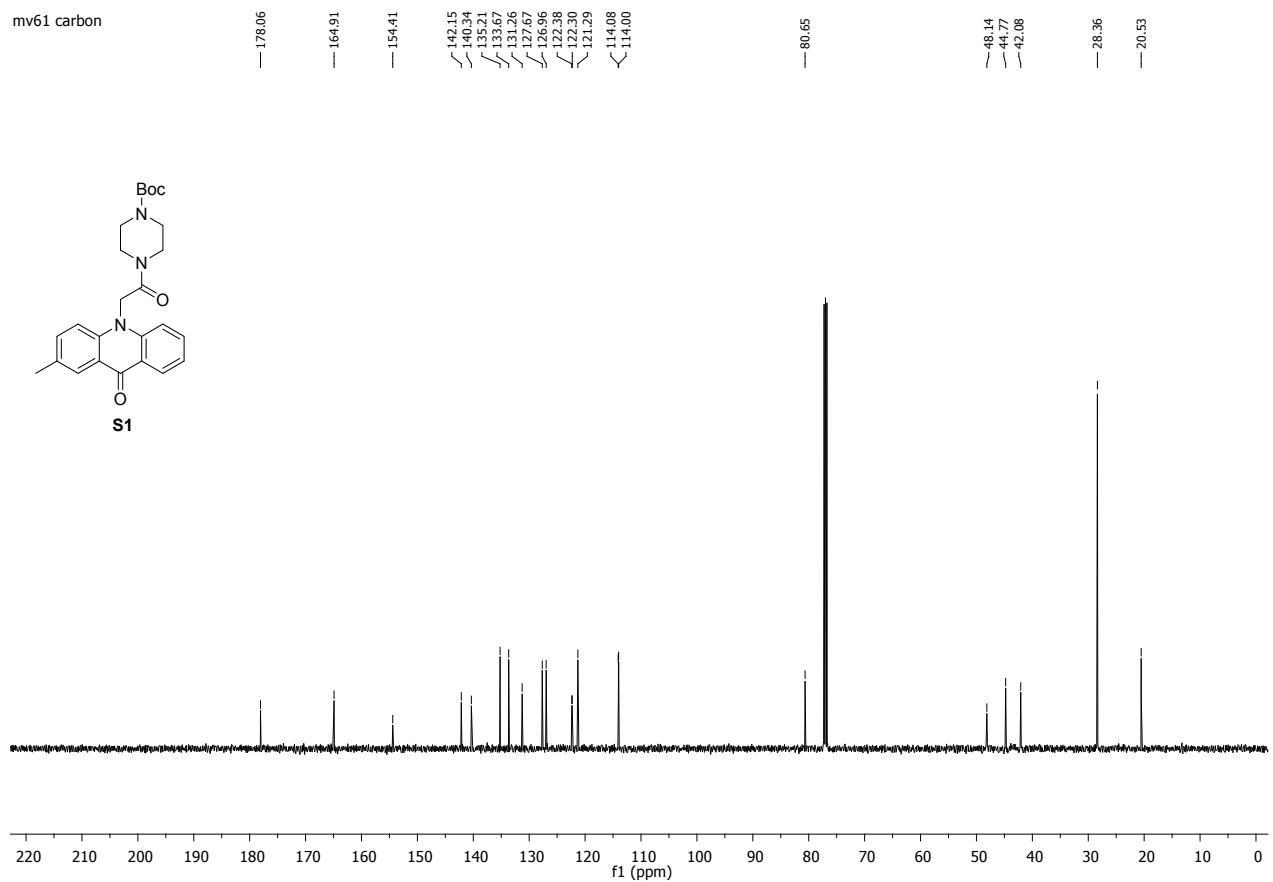

mv62 TFA salt

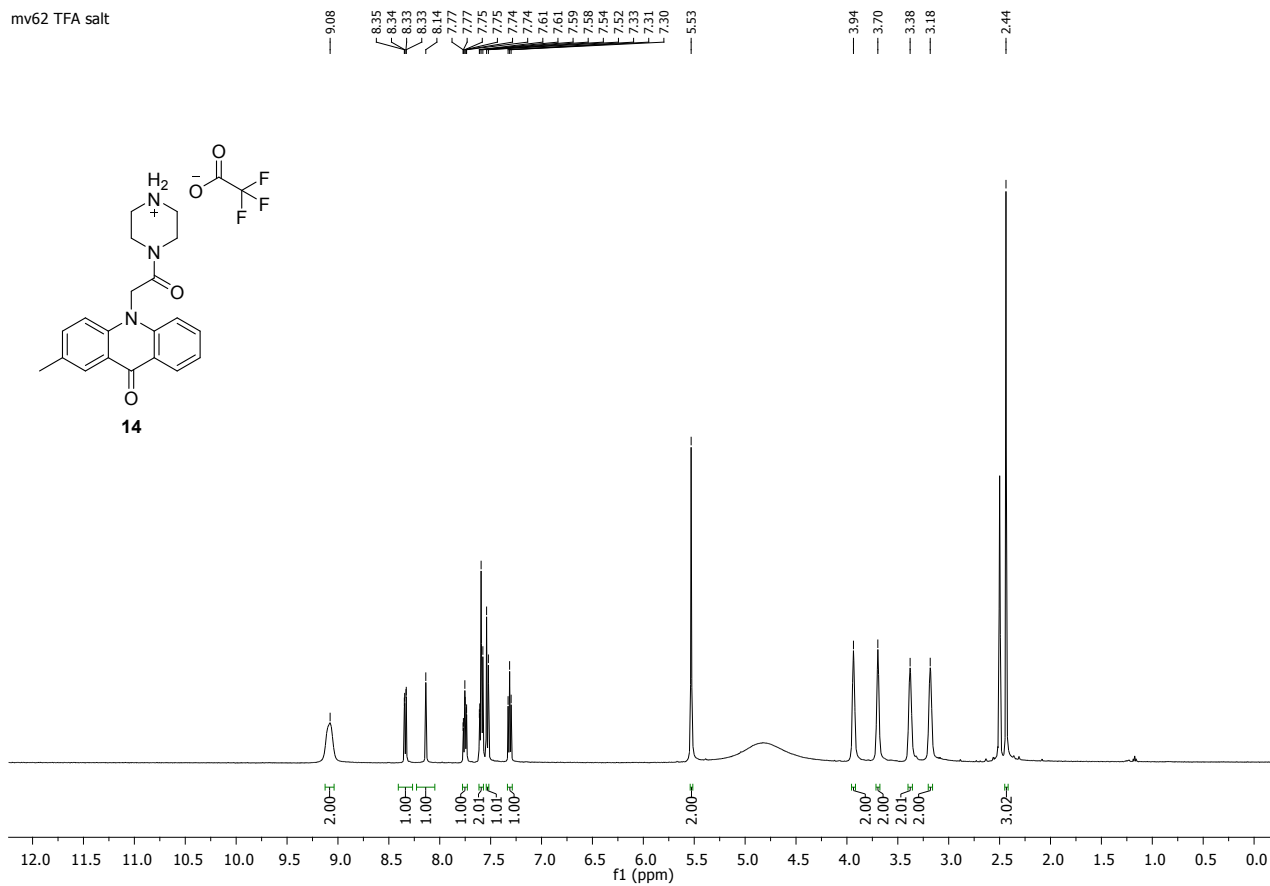

mv62 TFA salt carbon

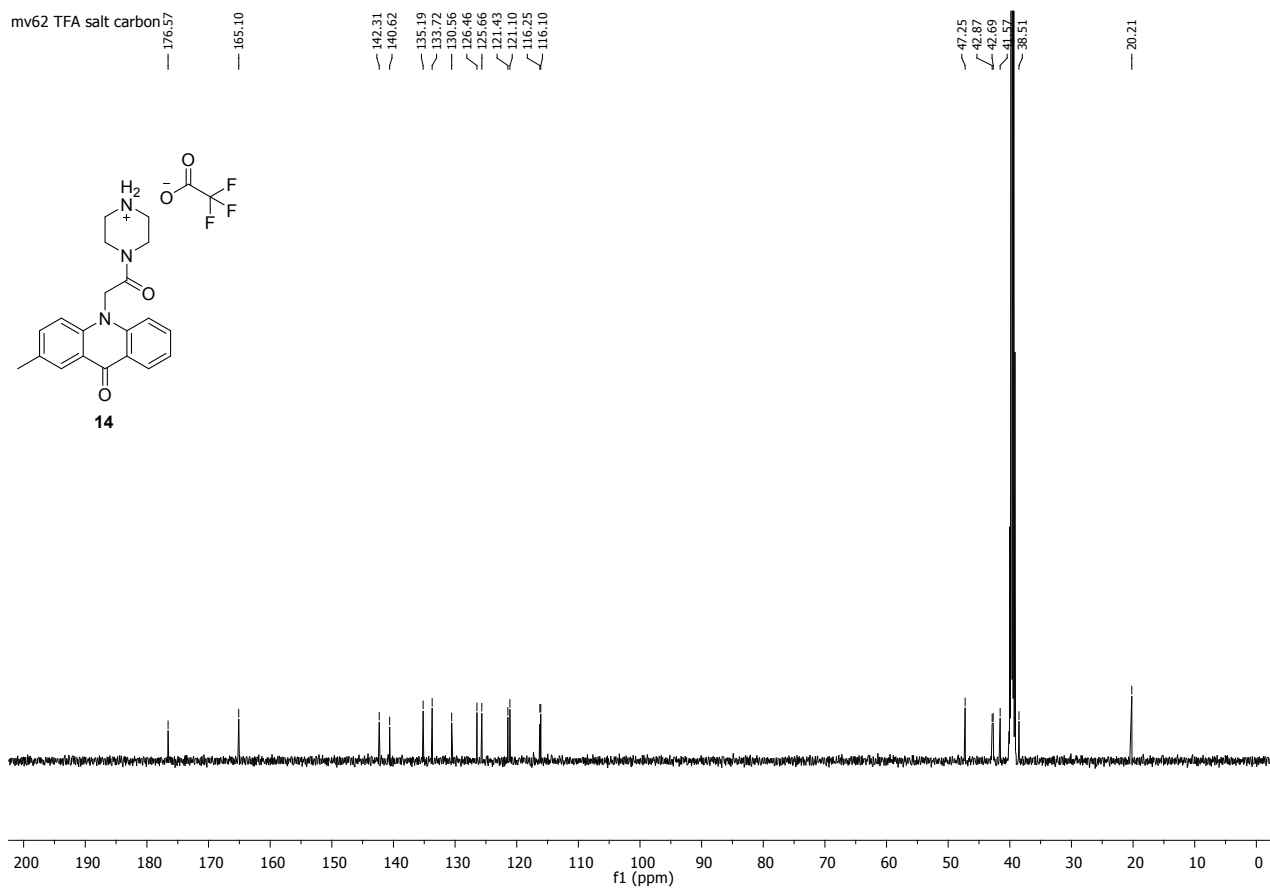

mv141

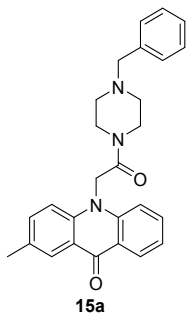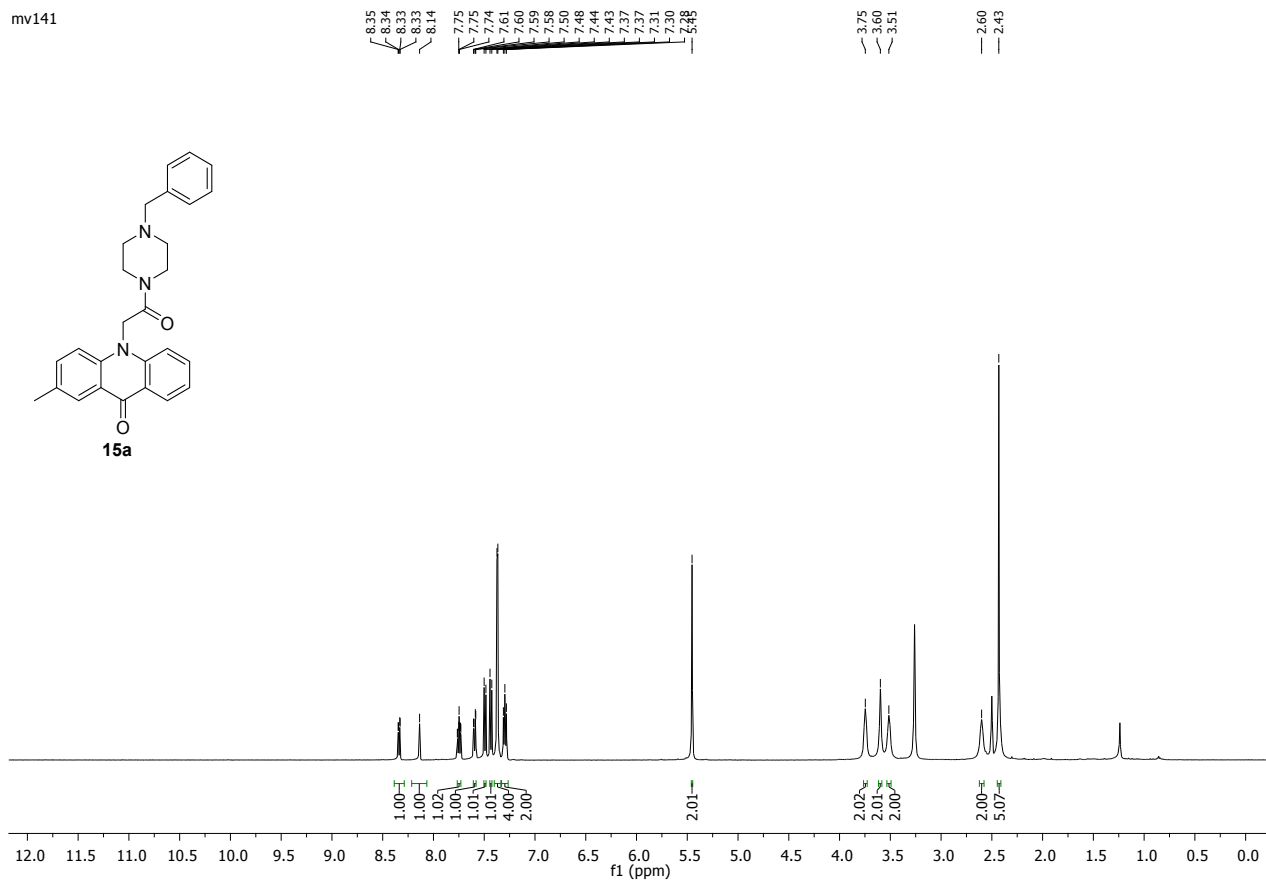

mv141 carbon

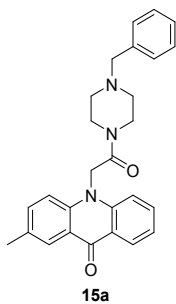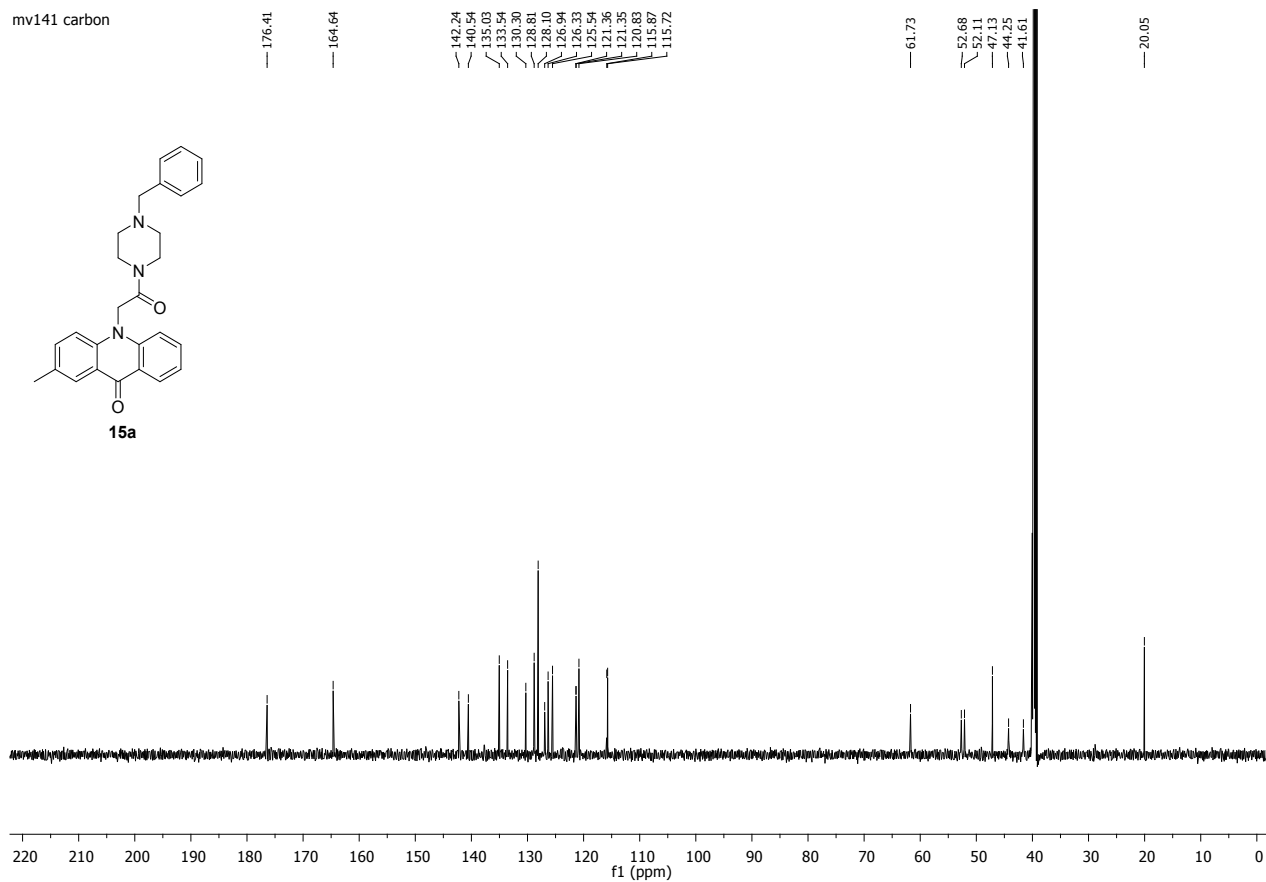









mv145

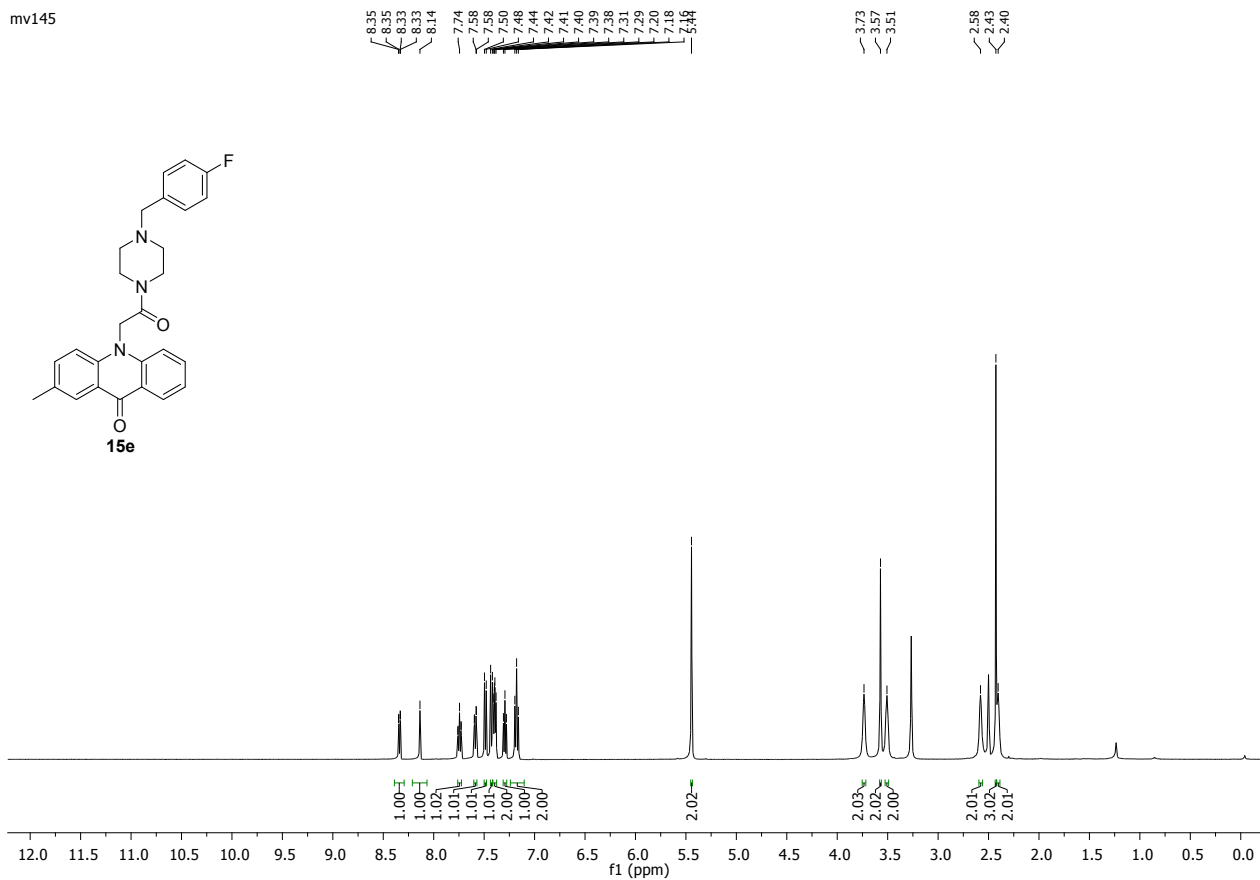

mv145 carbon

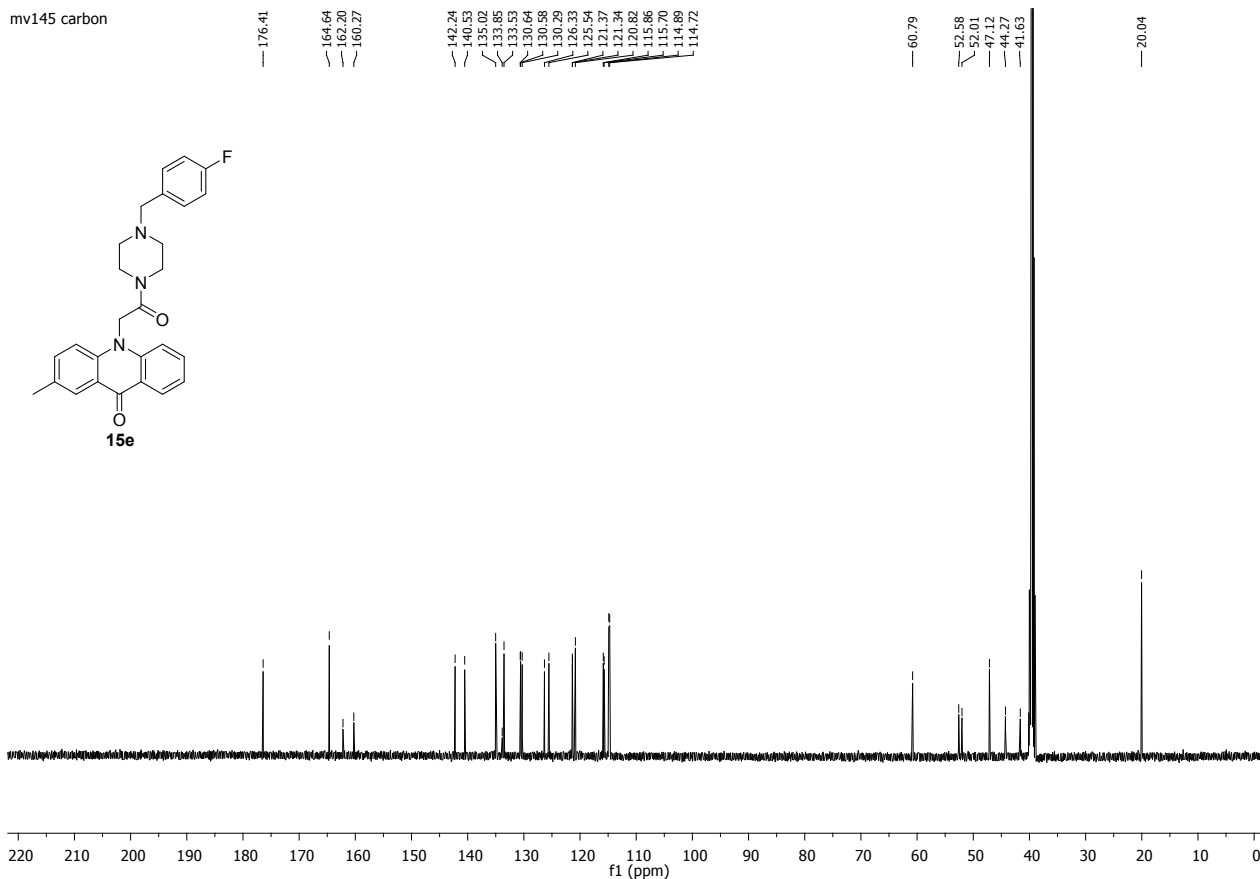

mv130

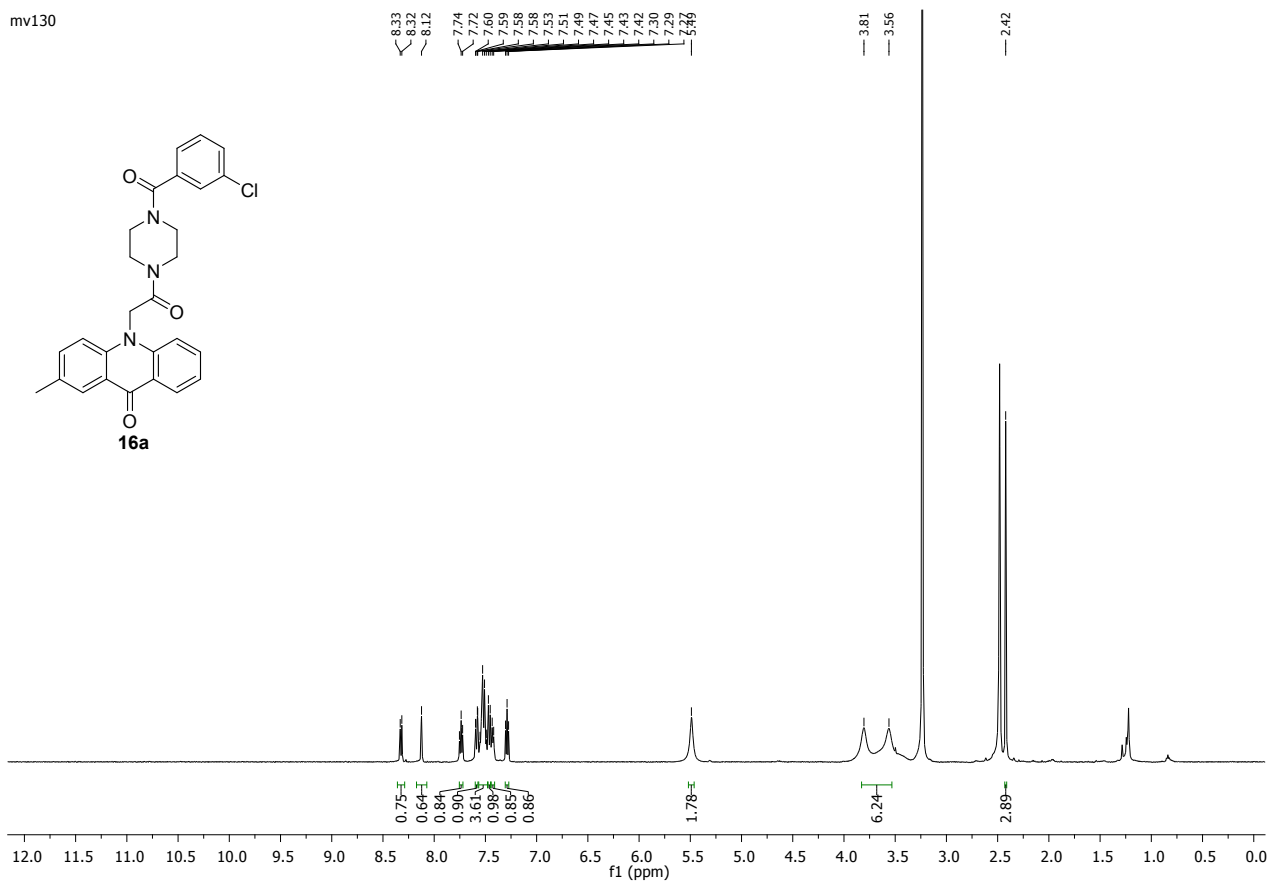

mv130 carbon

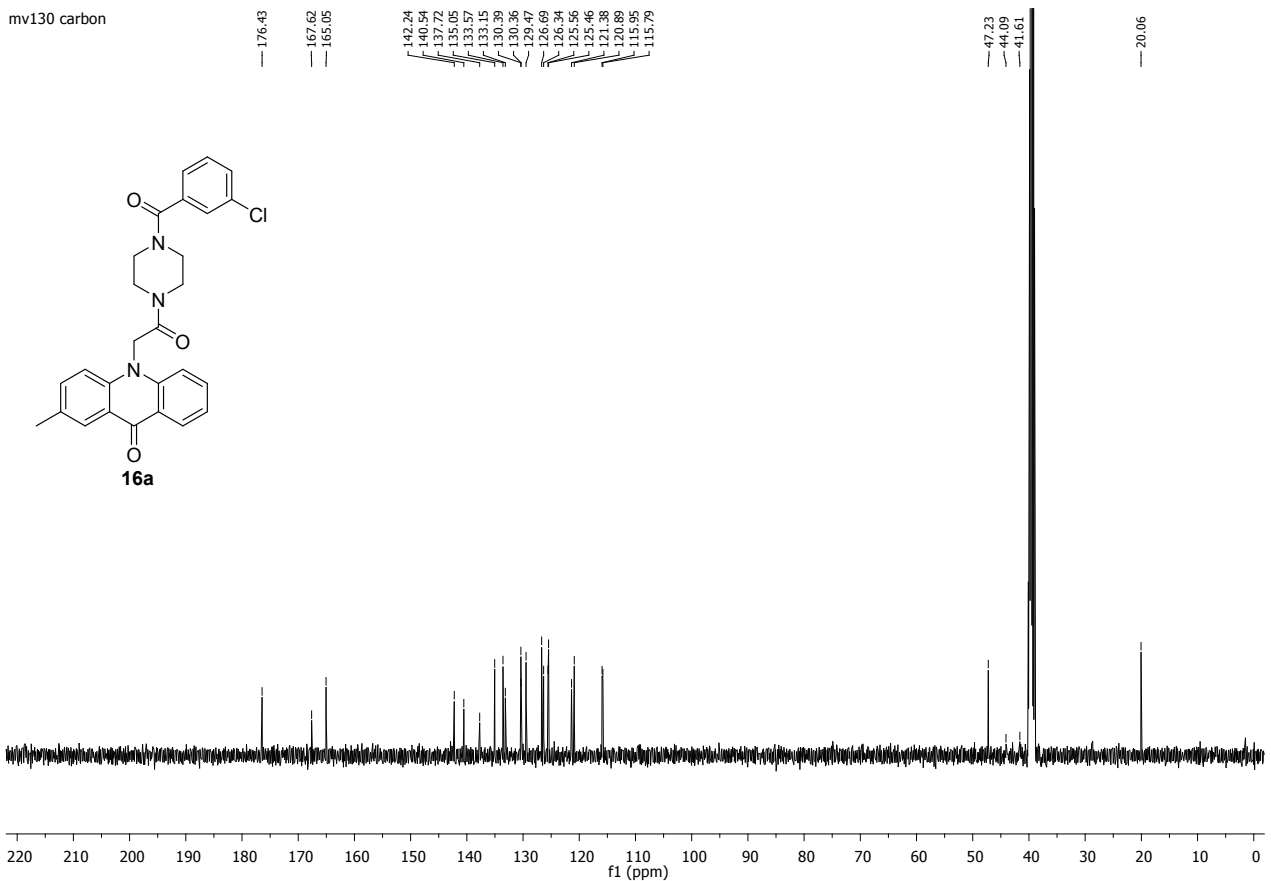

mv126

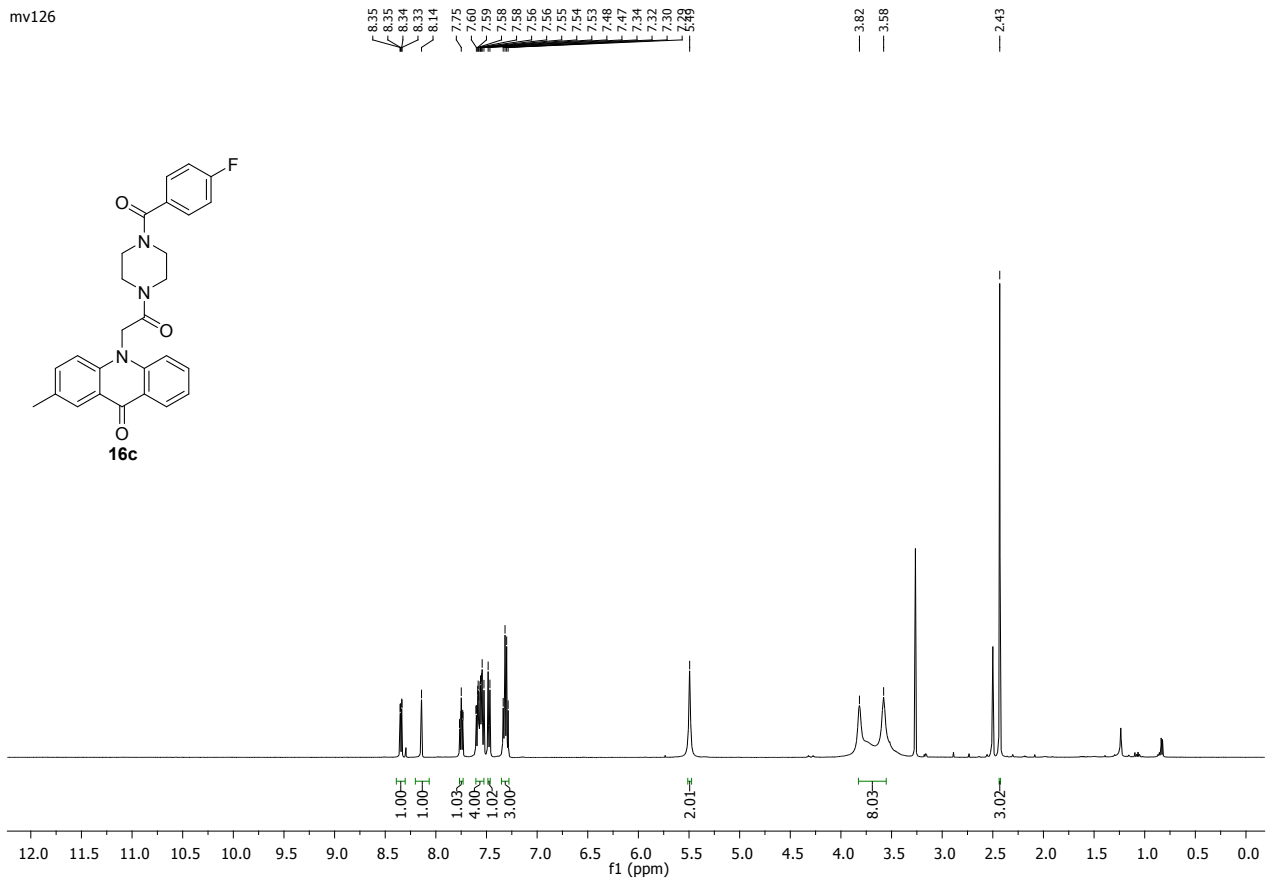

mv126 carbon

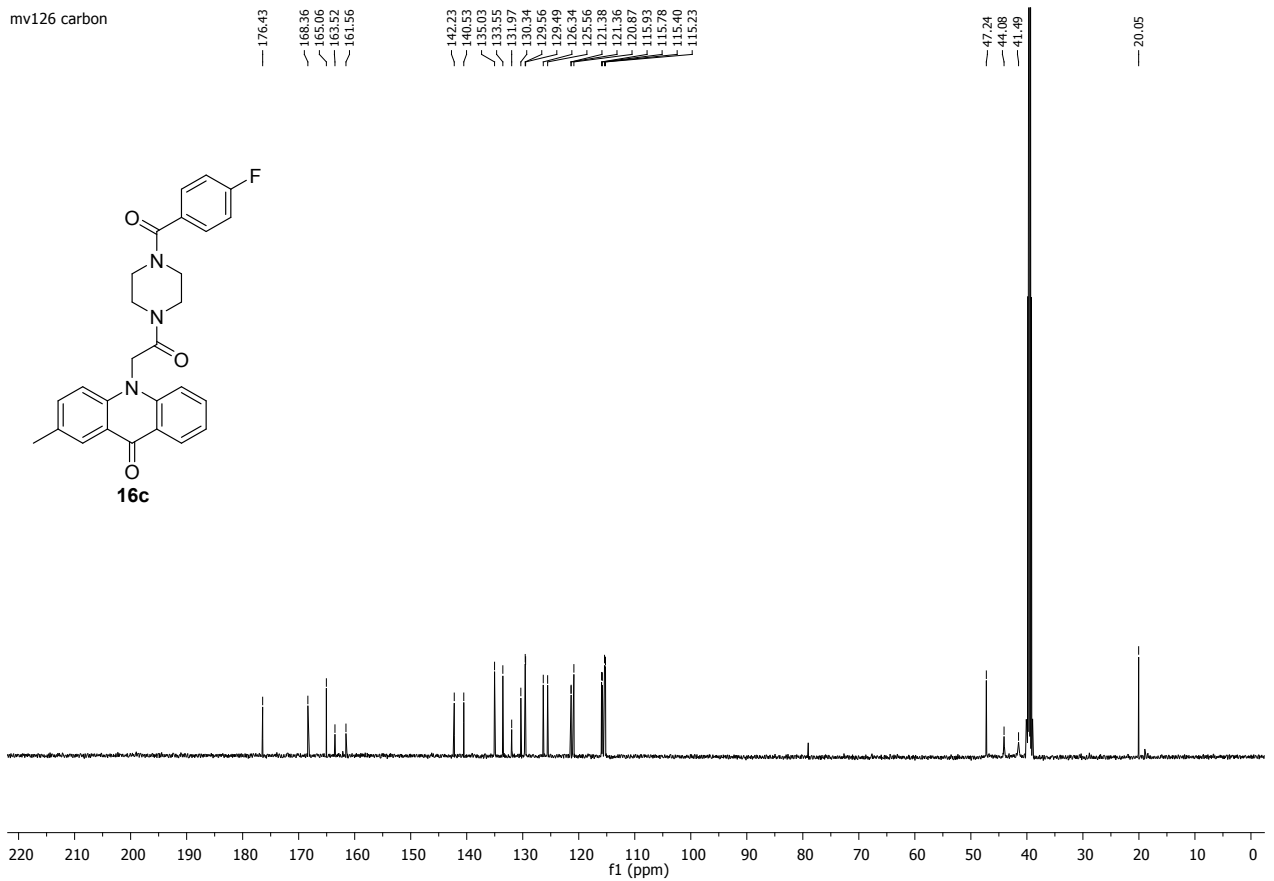

mv131

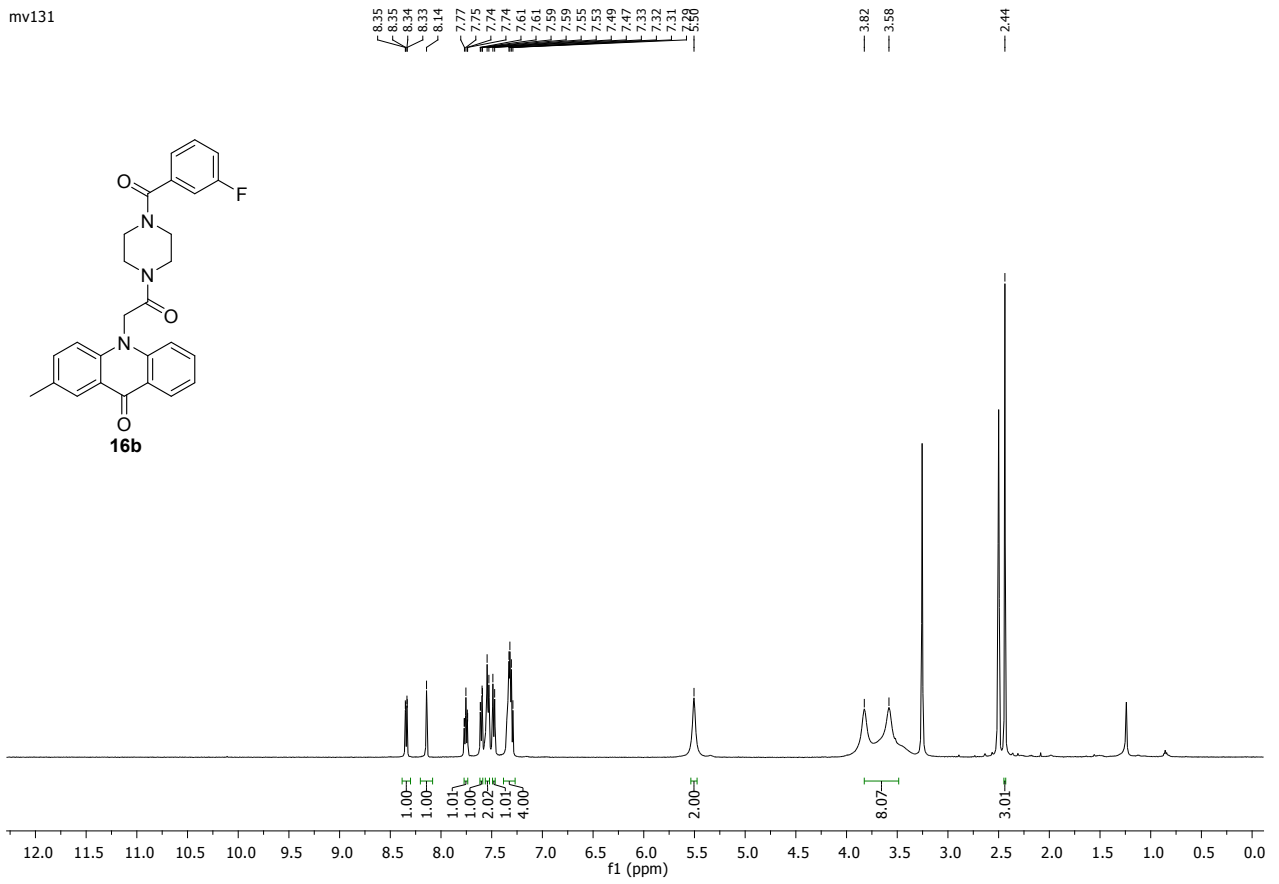

mv131 carbon

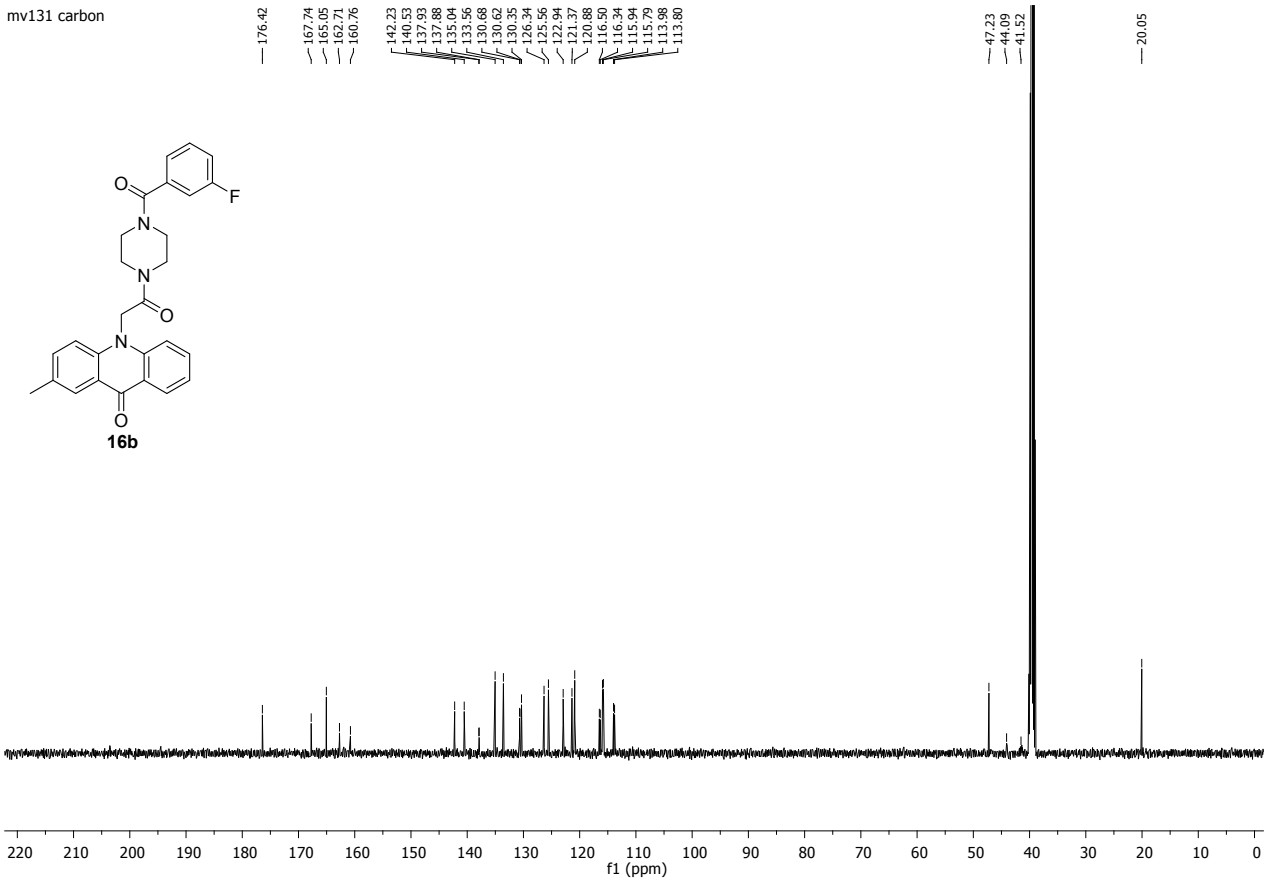

mv133

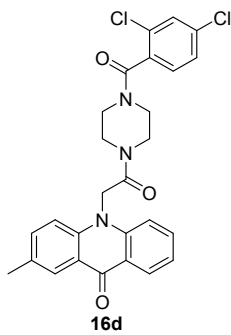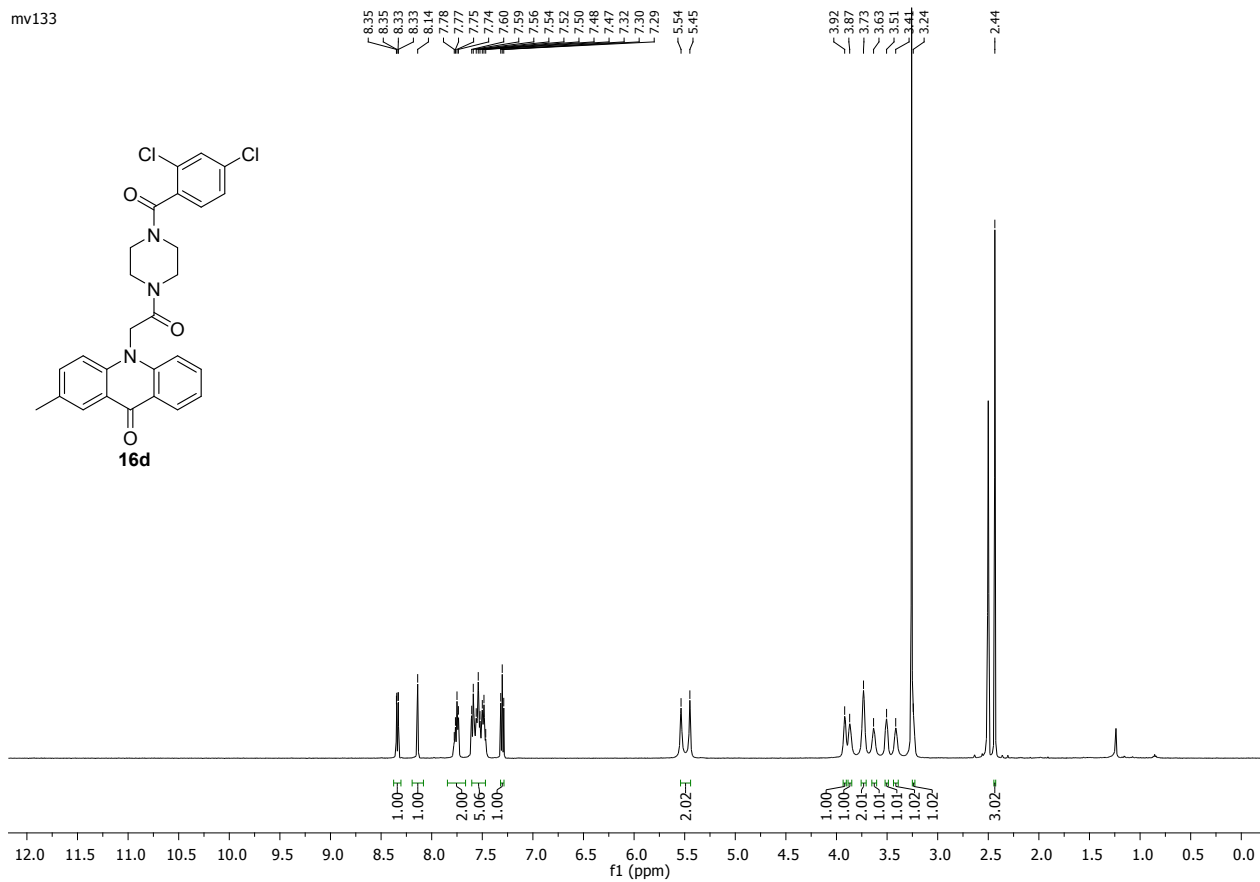

mv133 carbon

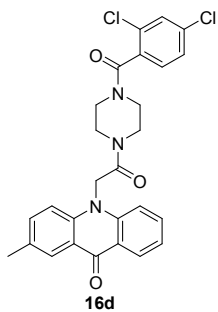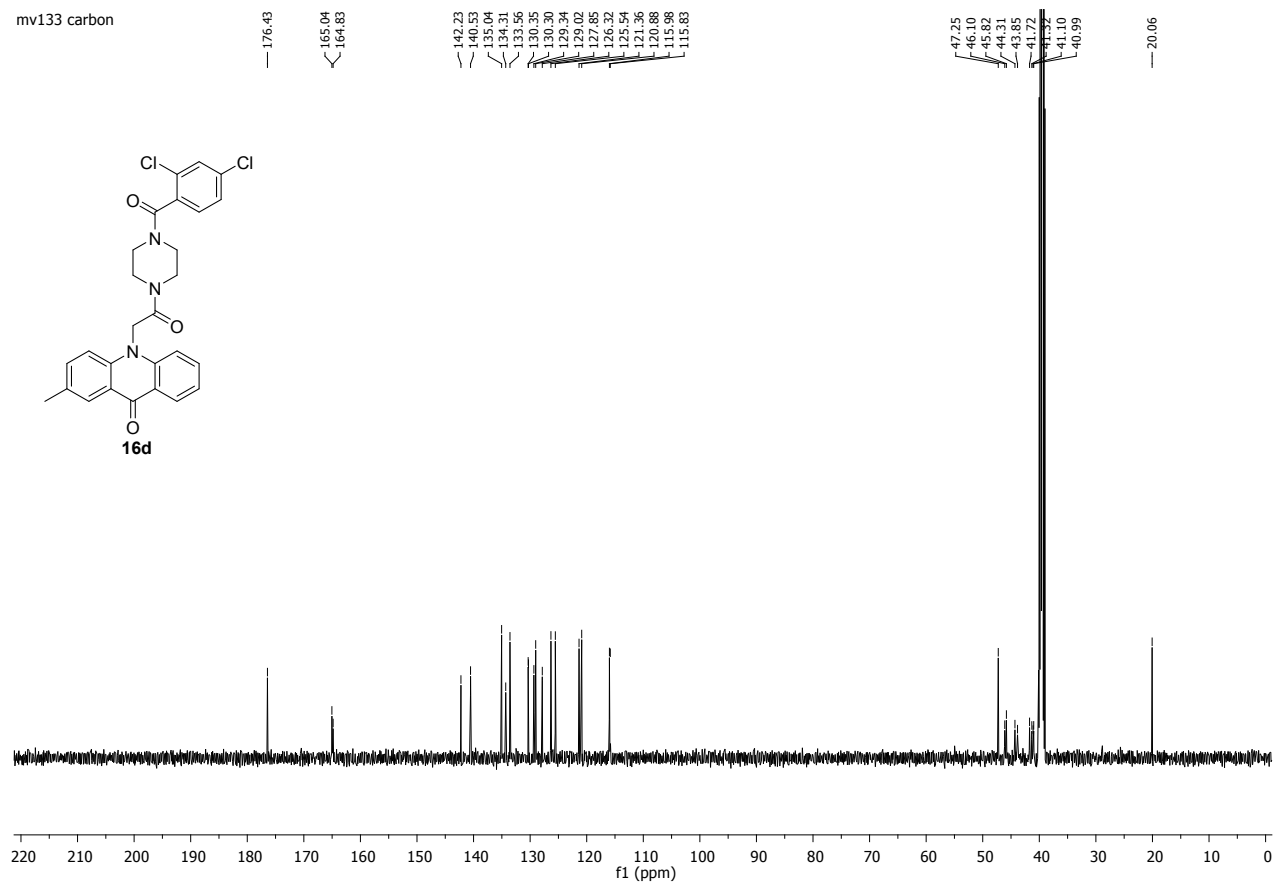

mv132

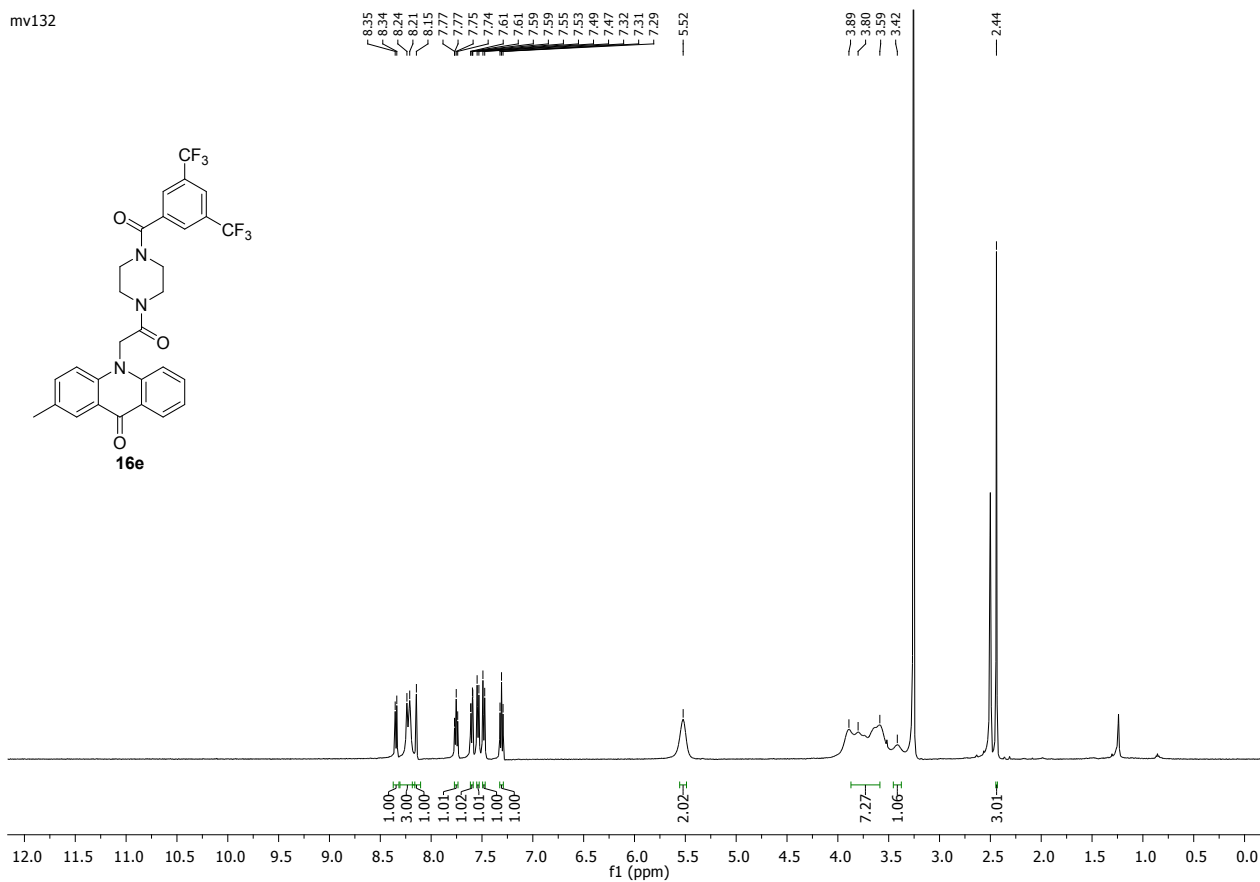

mv132 carbon

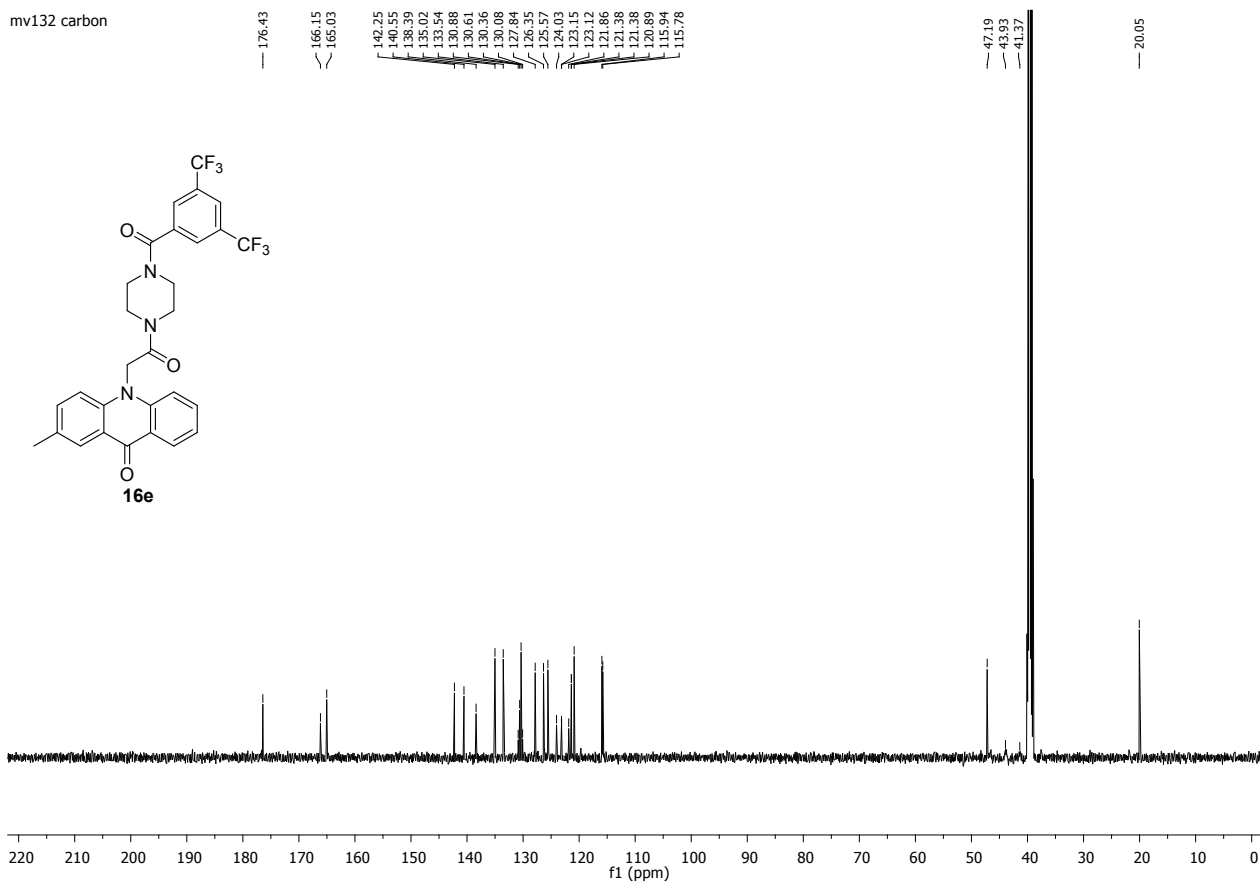

mv134

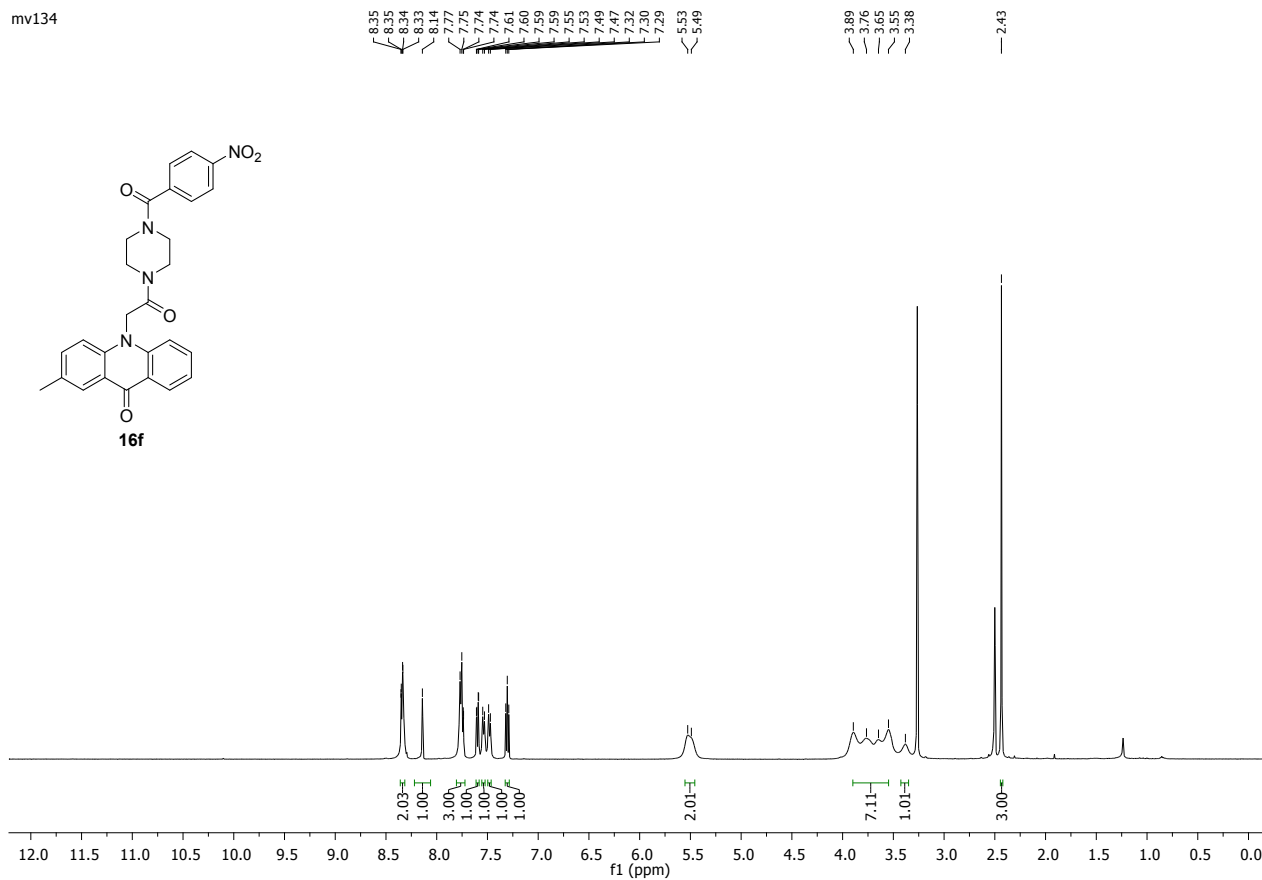

mv134 carbon

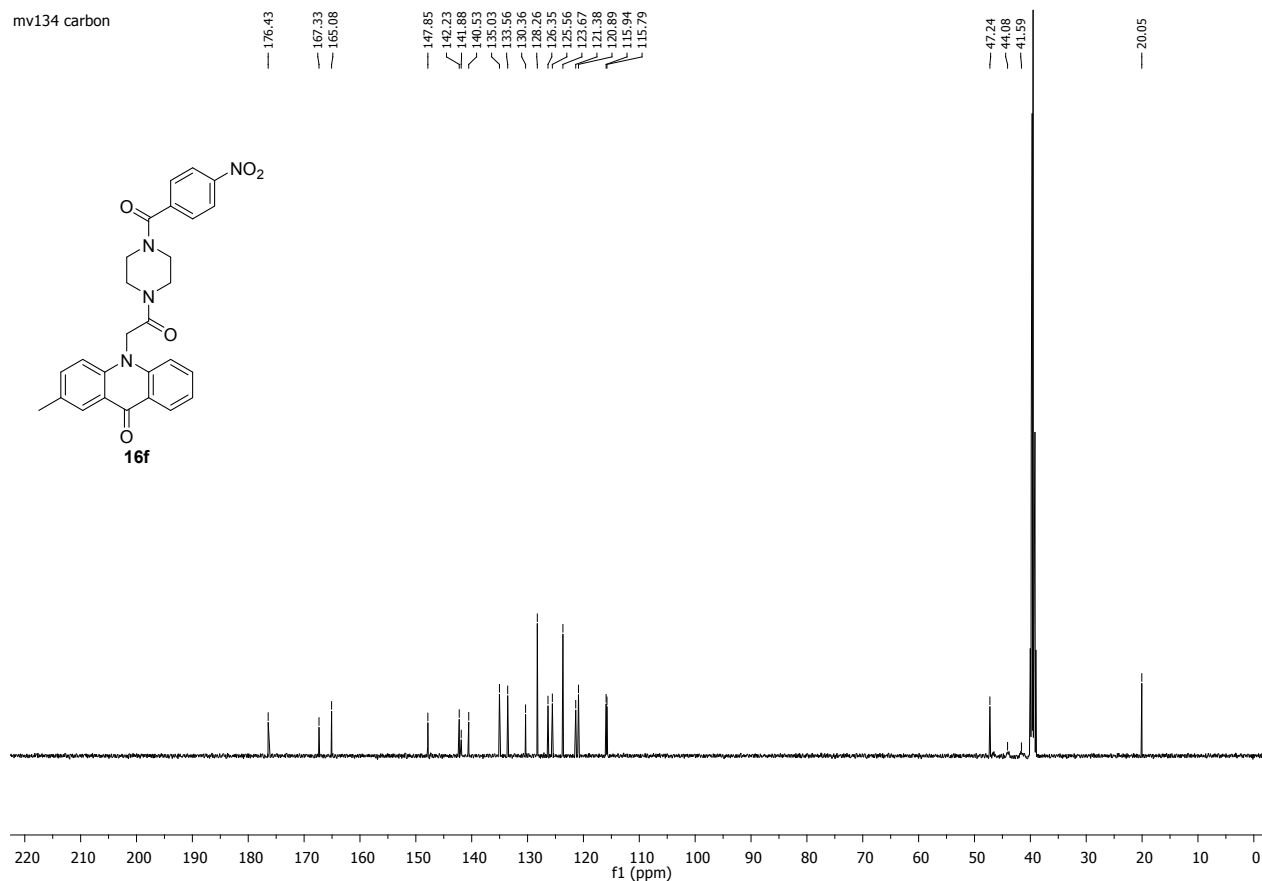





mv135

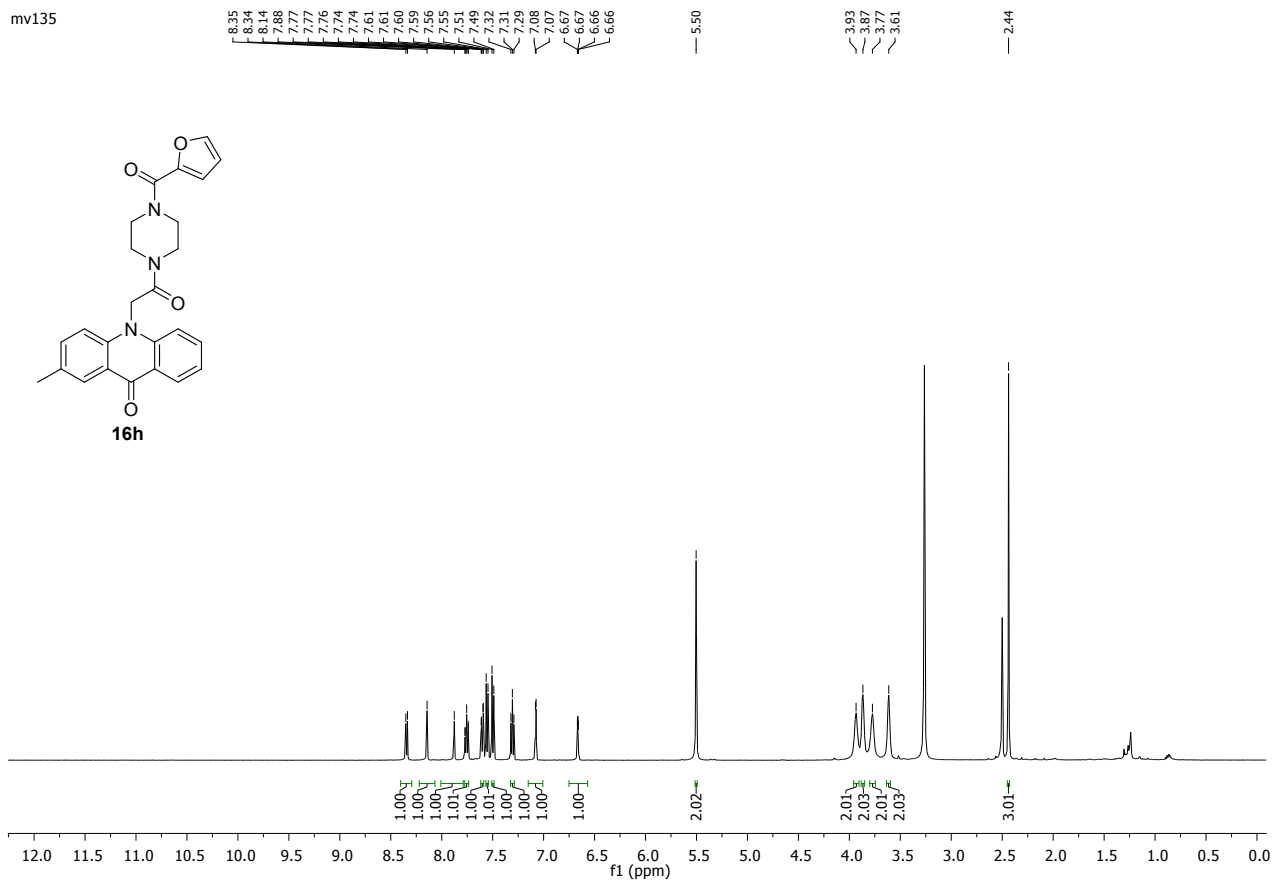

mv135 carbon

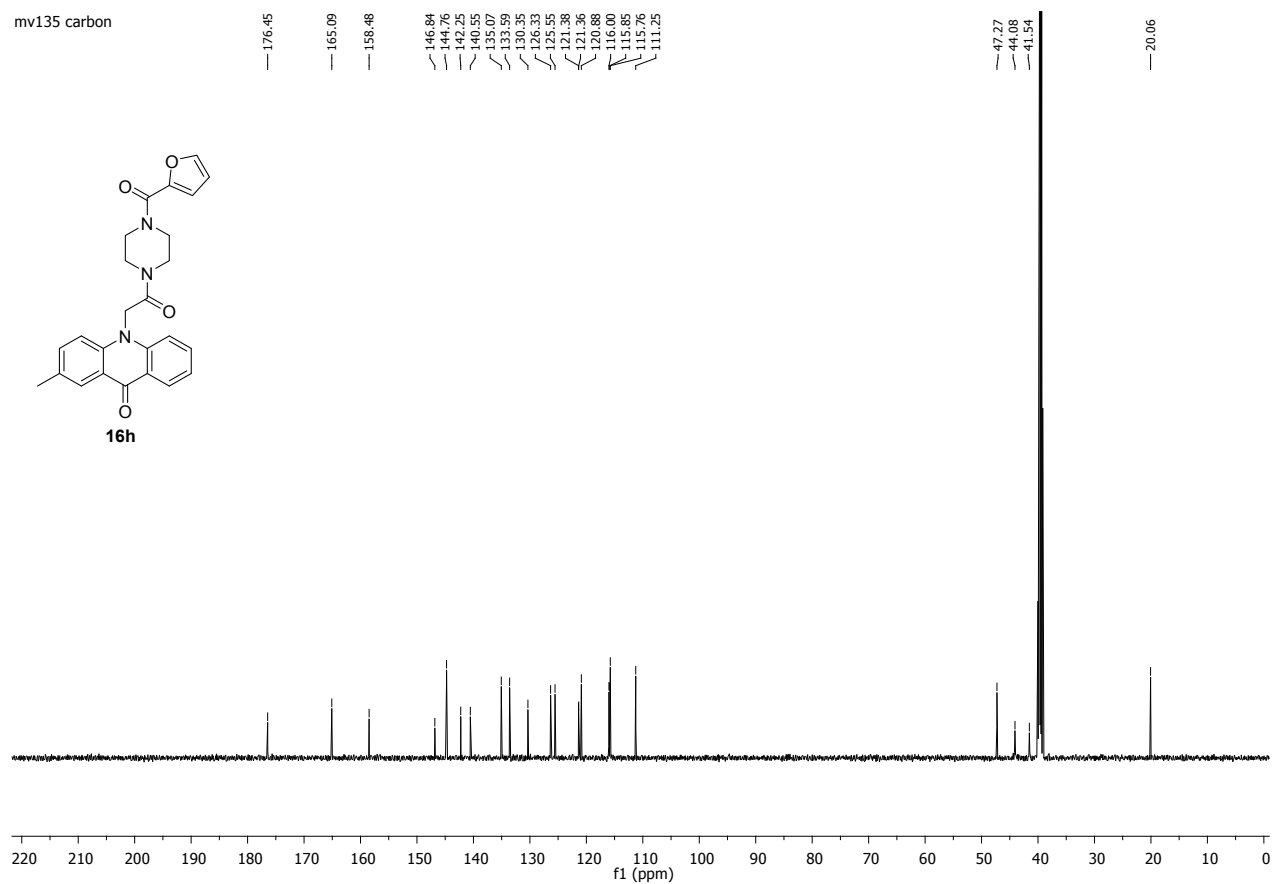

mv20

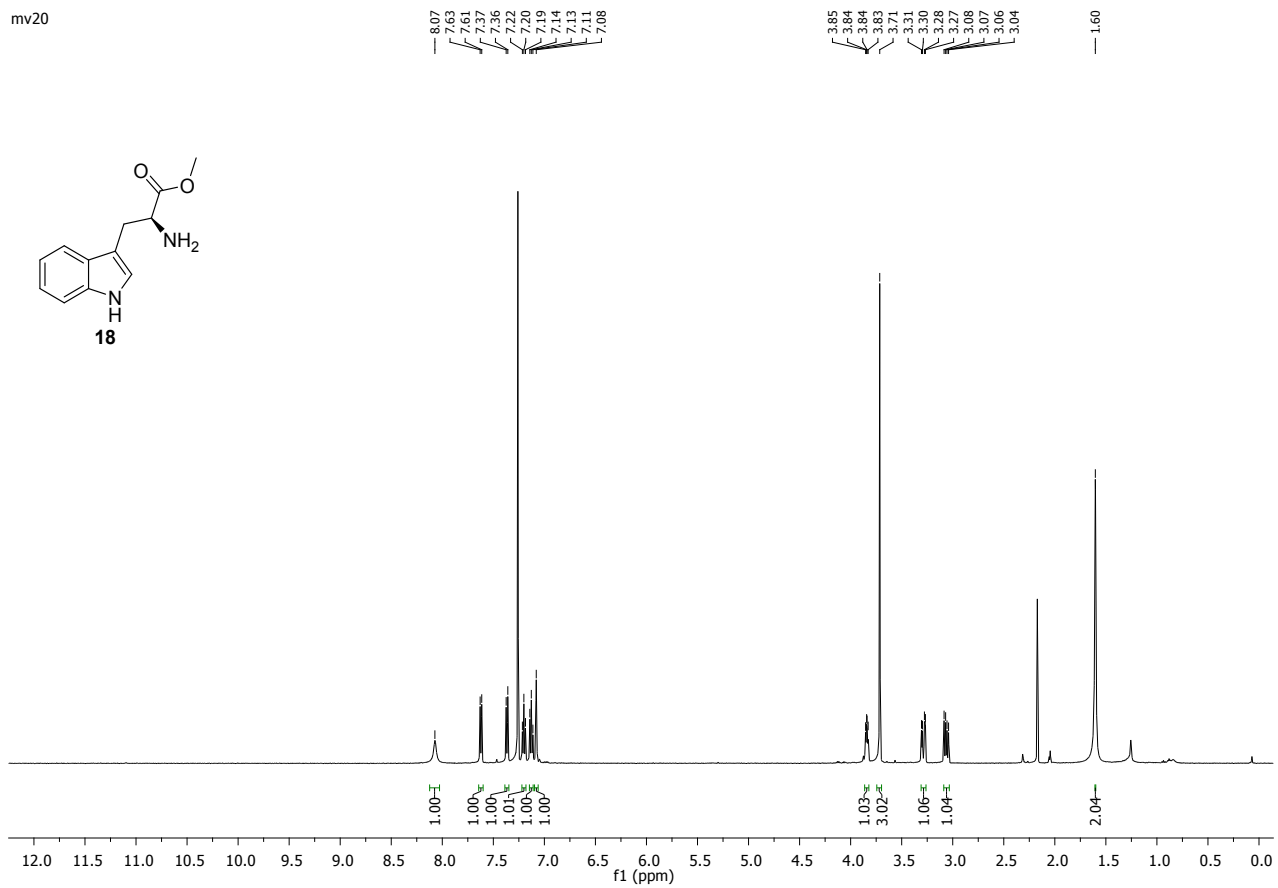

mv21

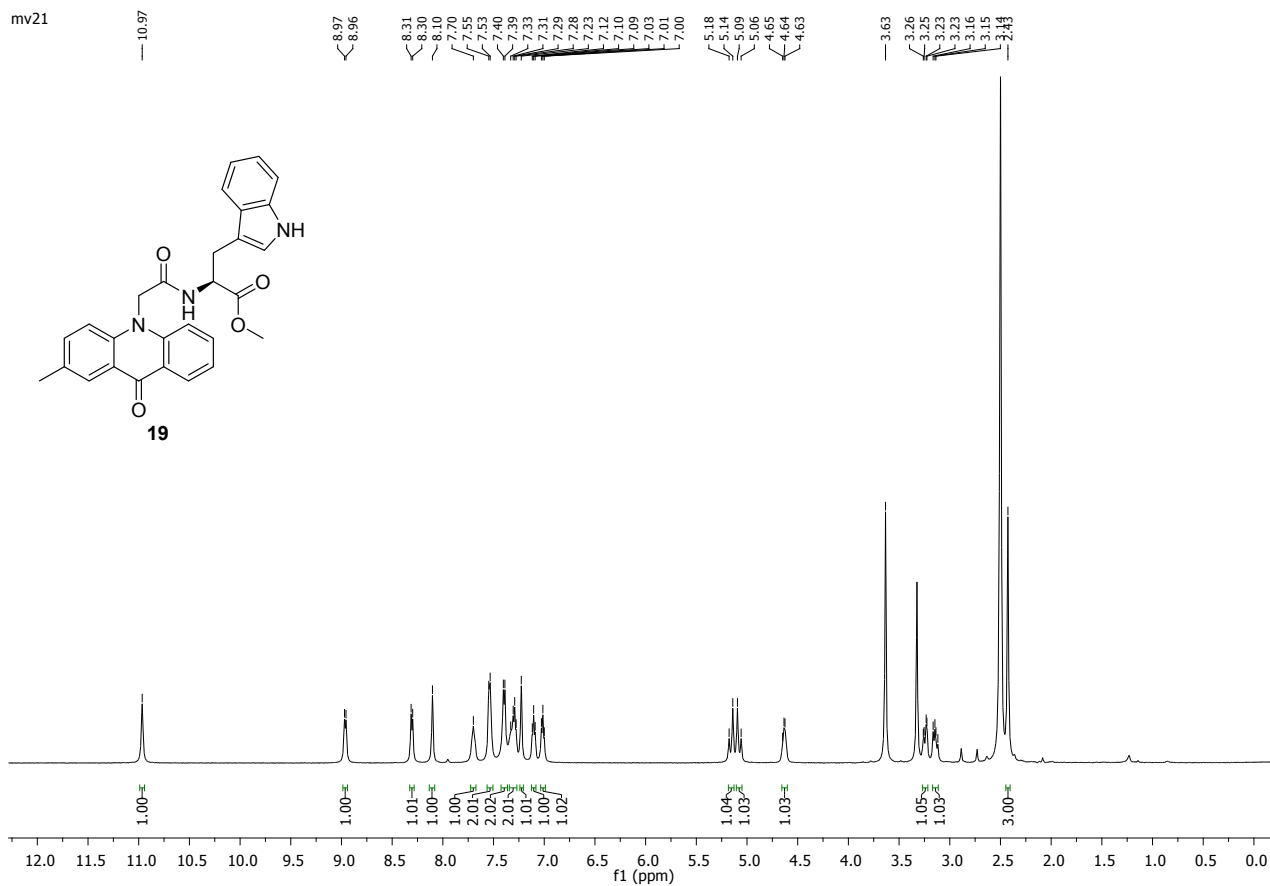

mv21 carbon

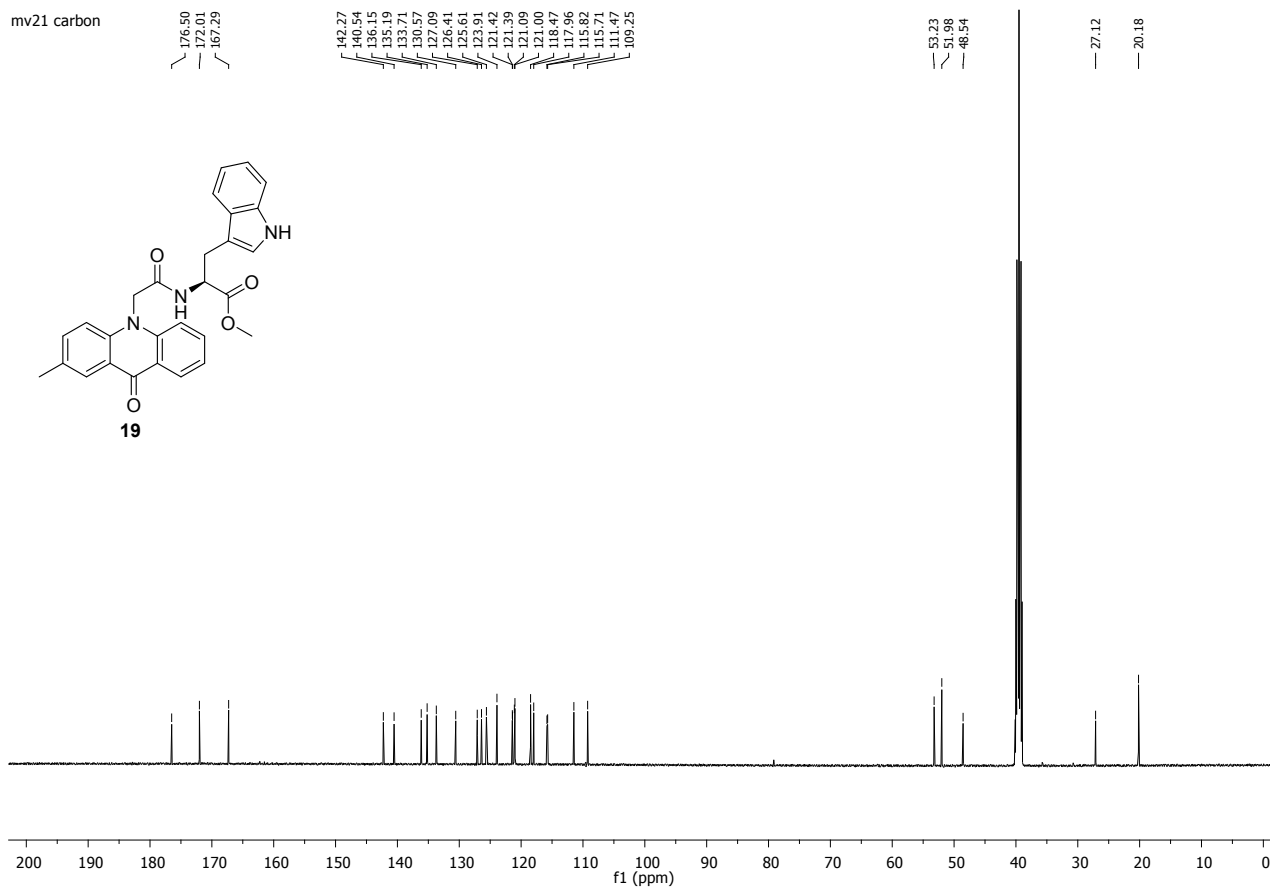

mv22

12.93

10.94

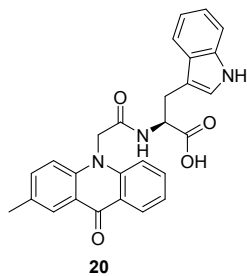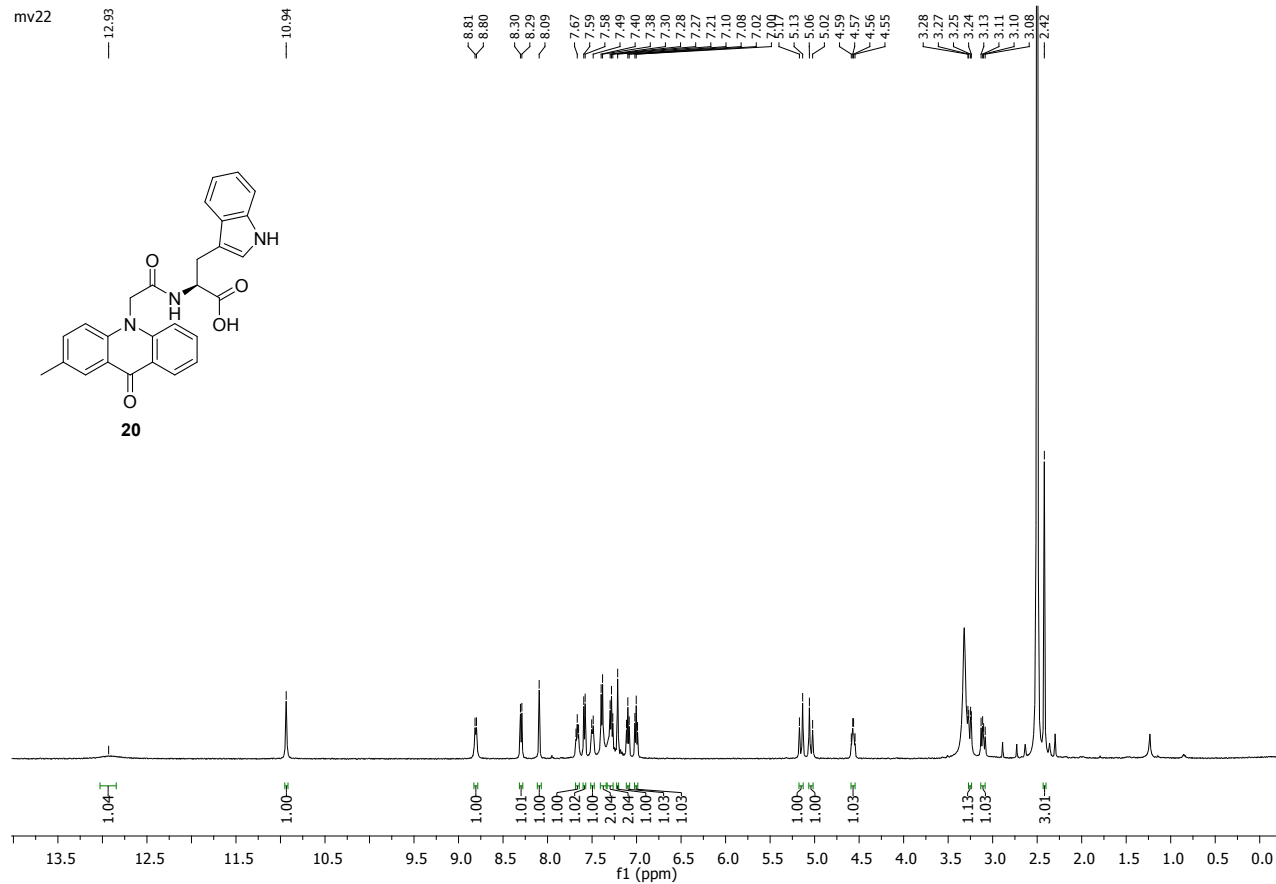

mv22 carbon

176.47

173.09

167.00

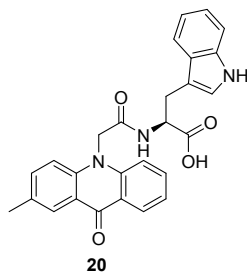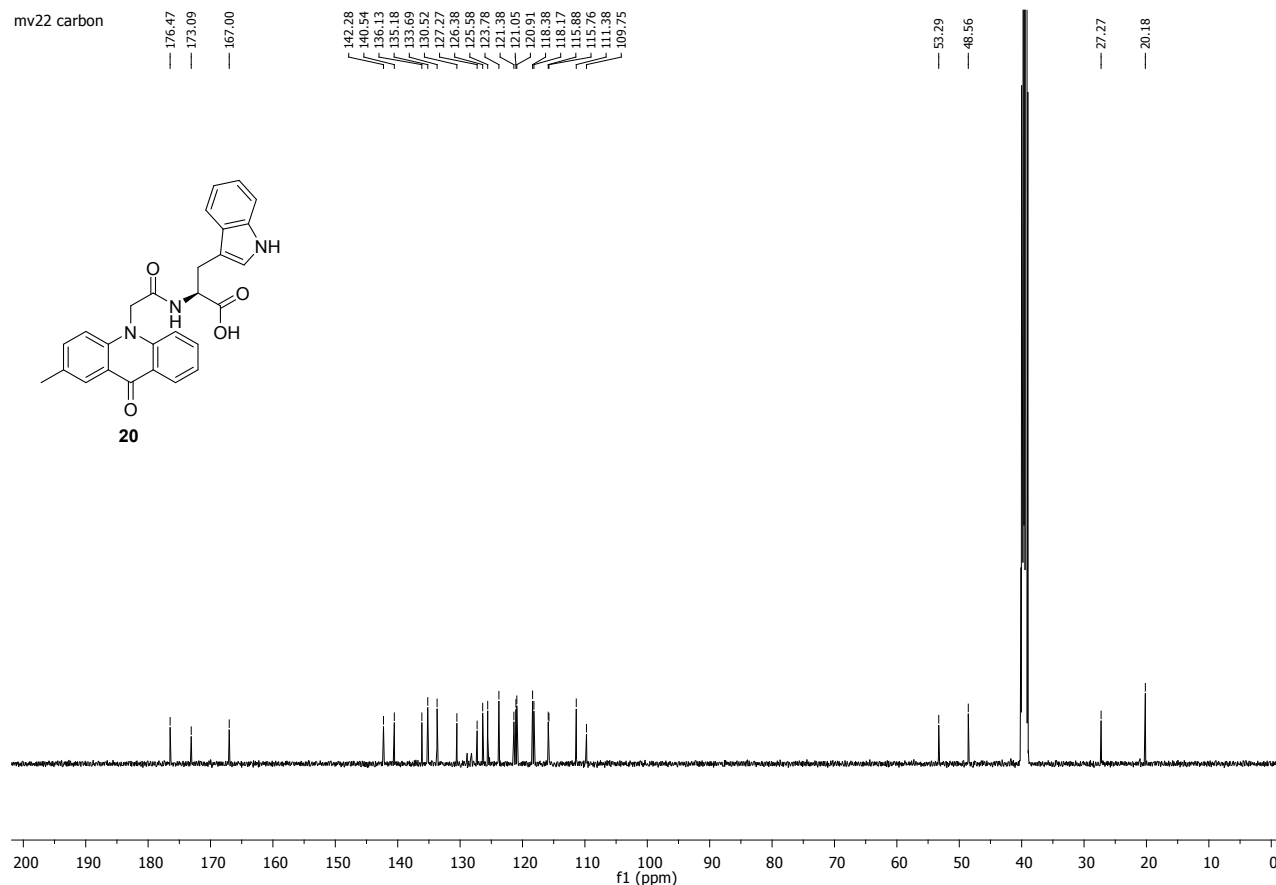

mv23

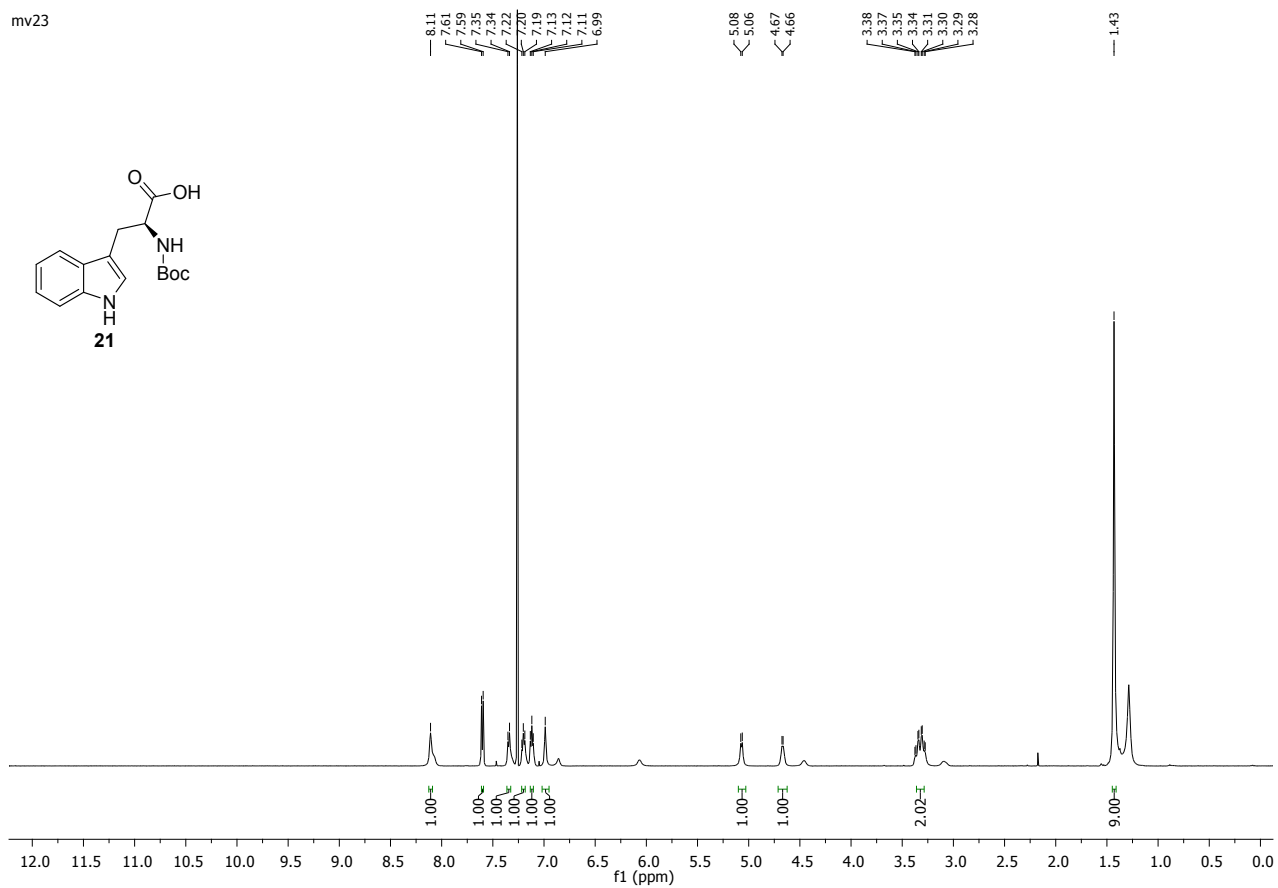

mv23 carbon

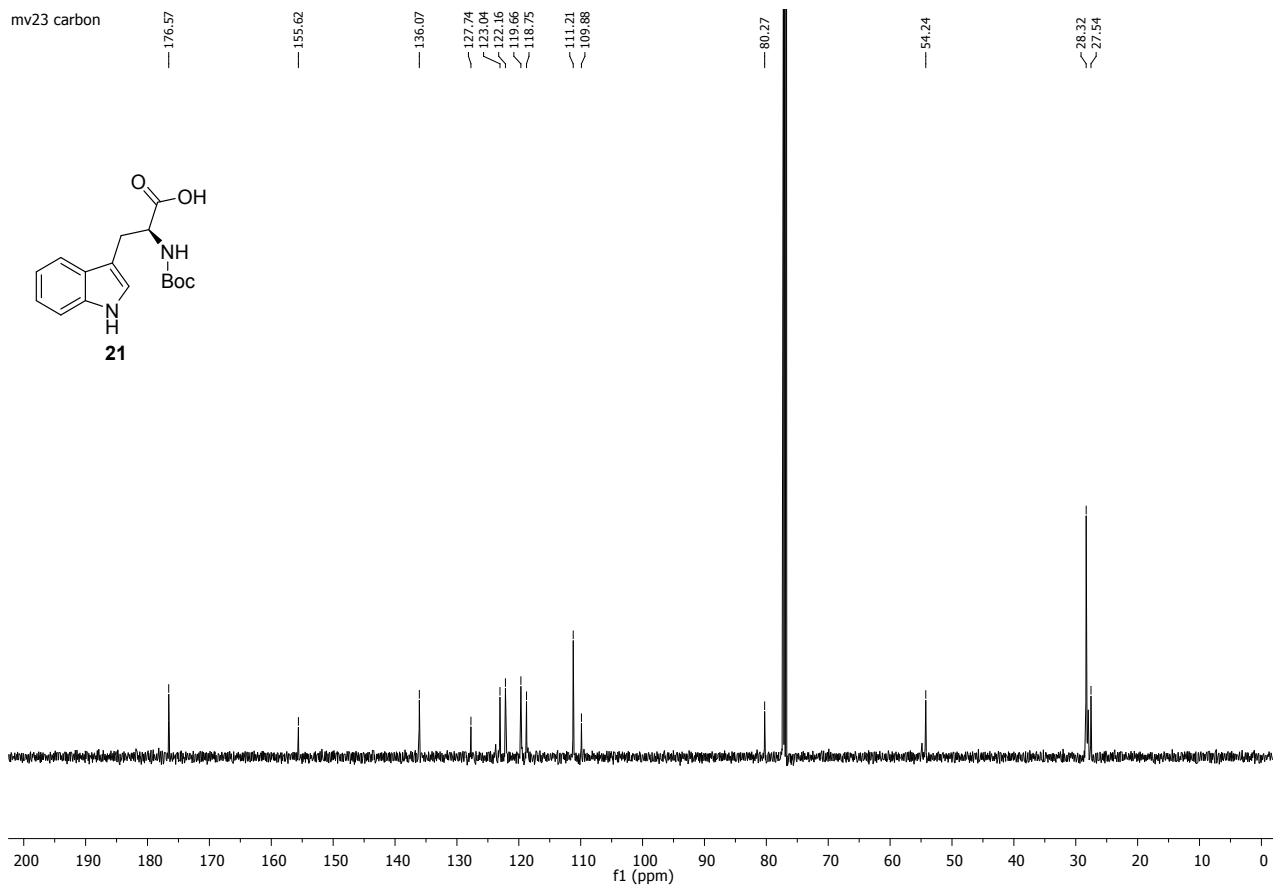

mv24

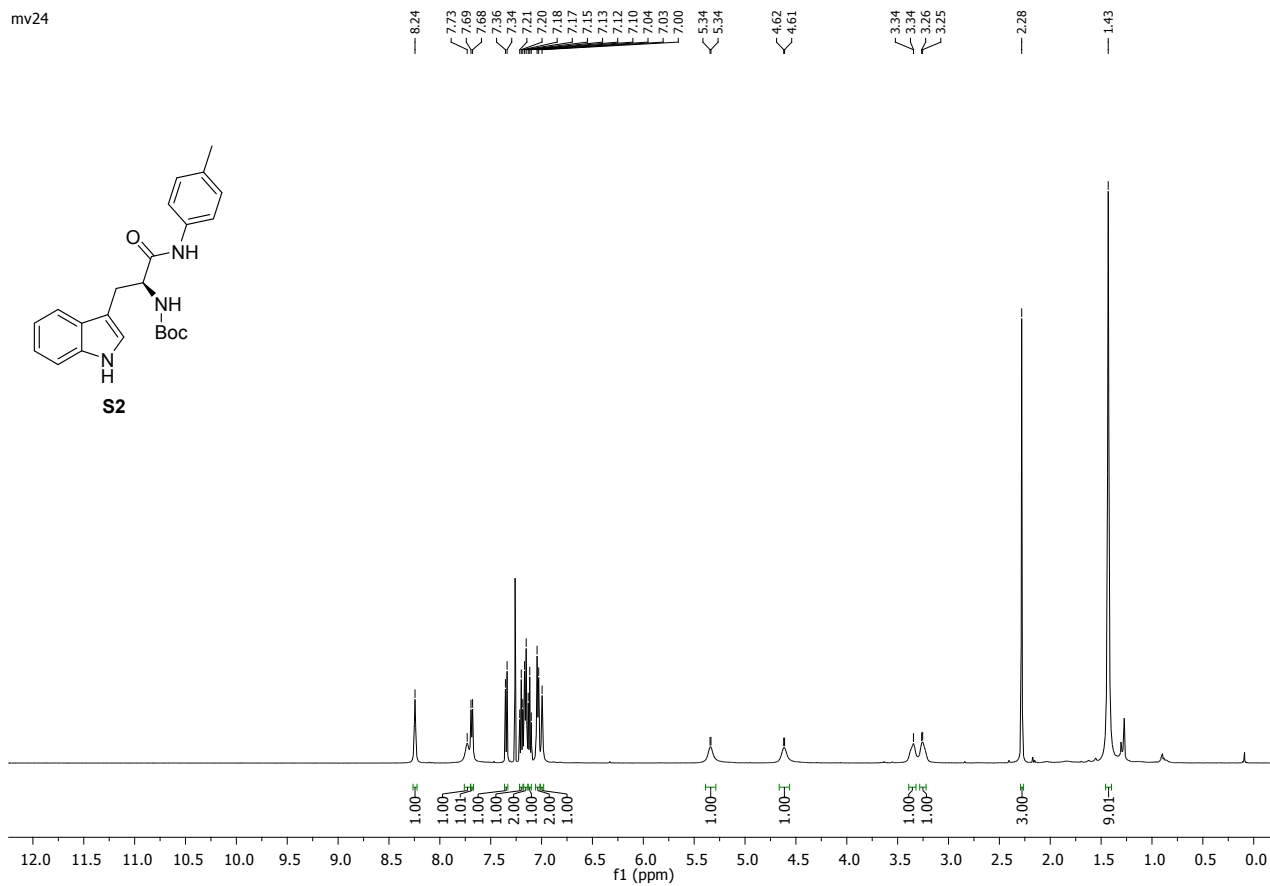

mv24 carbon

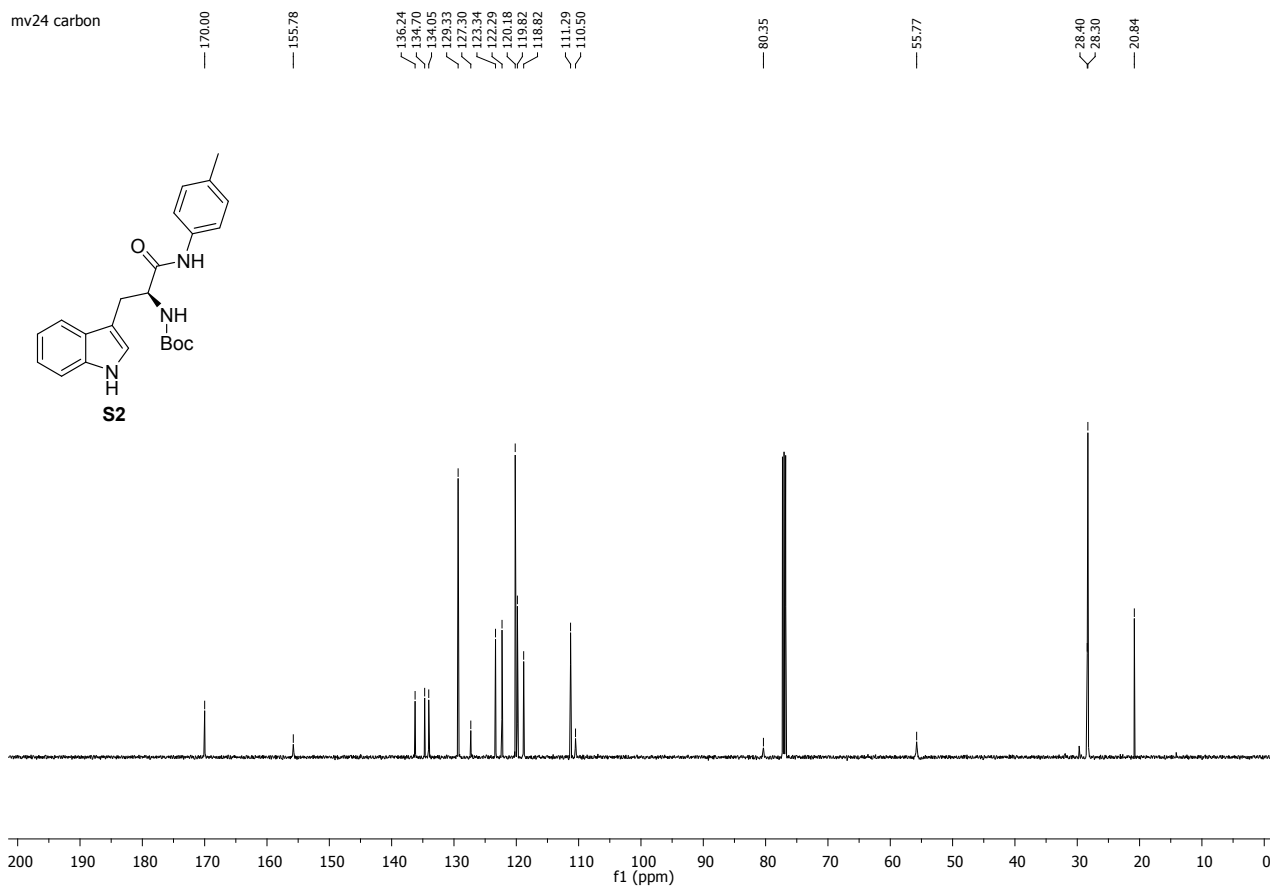

mv29

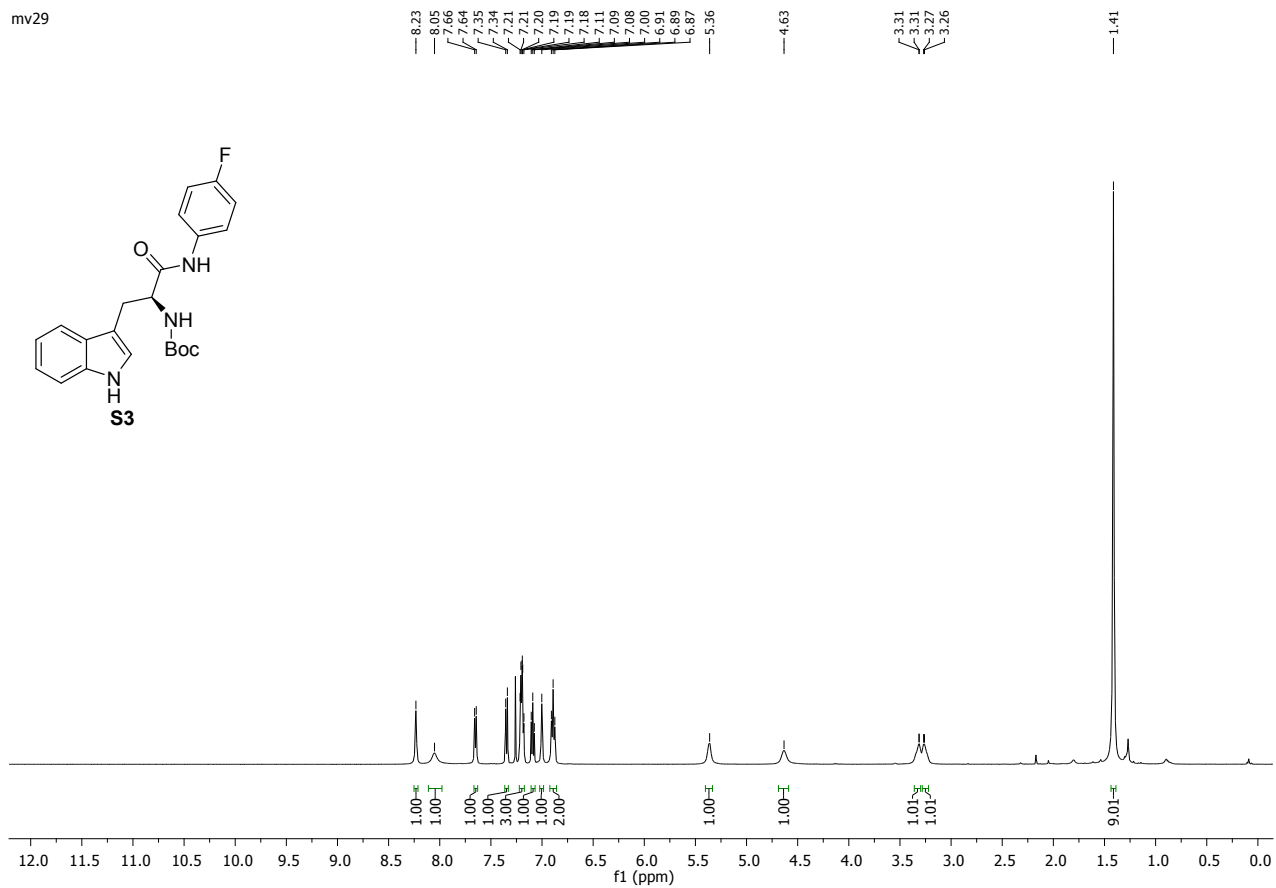

mv29carbon

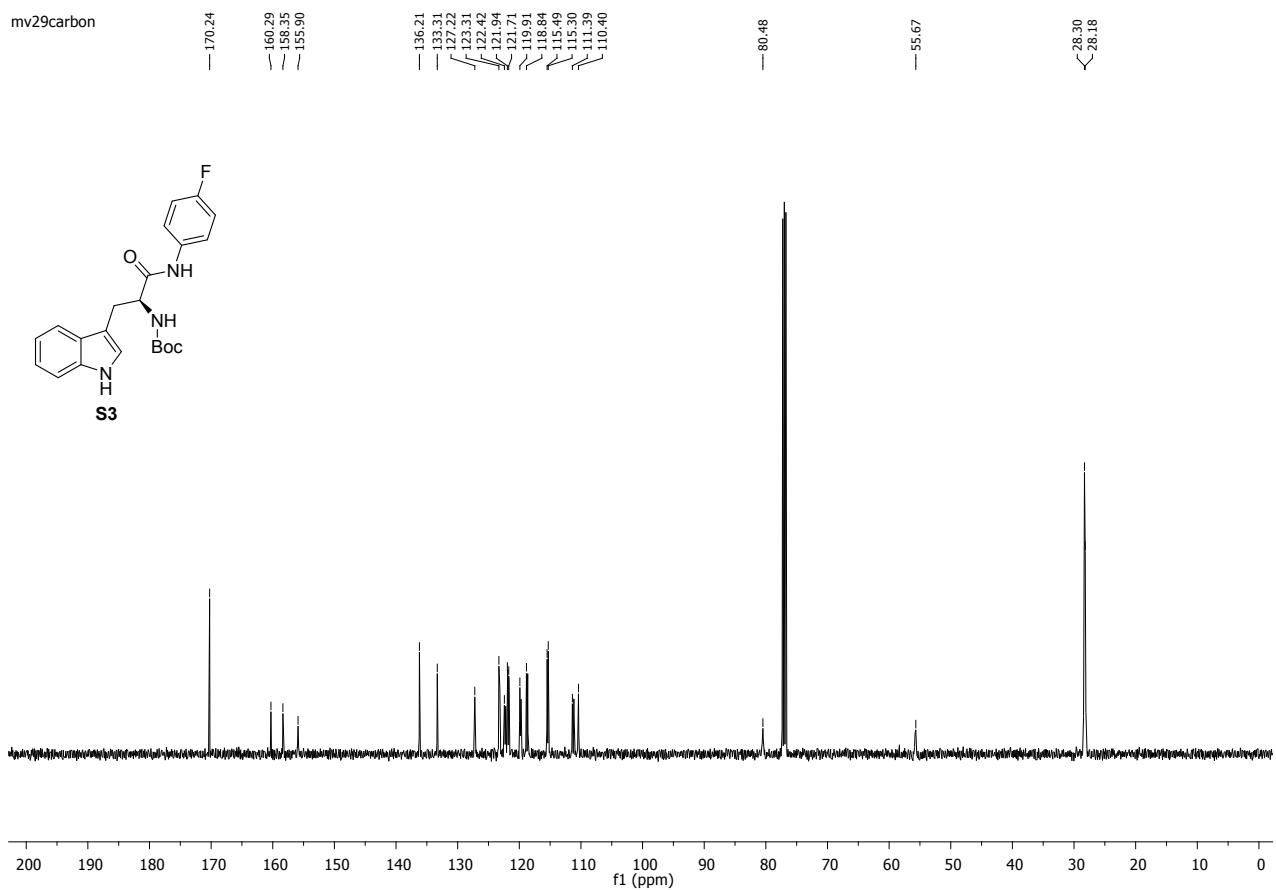

mv27

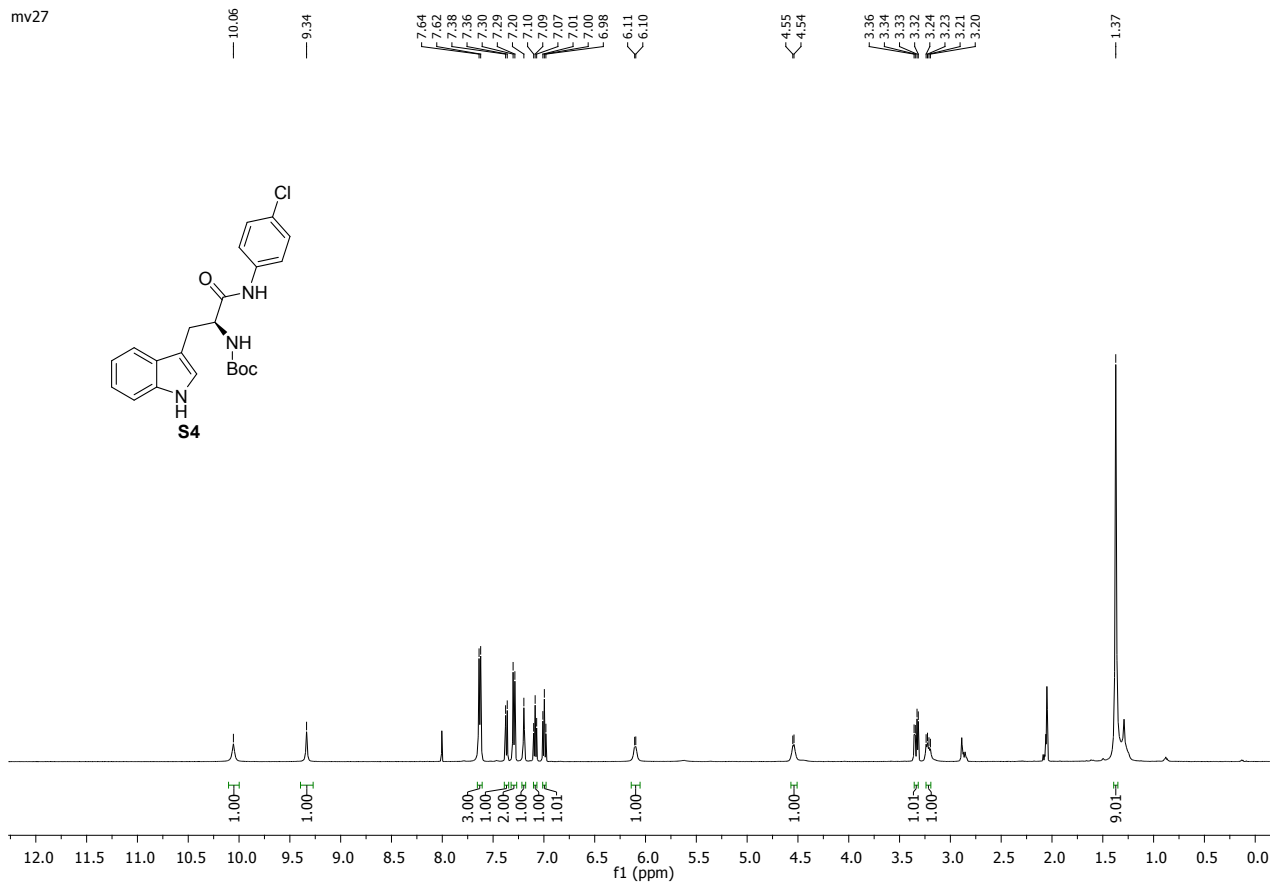

mv27 carbon

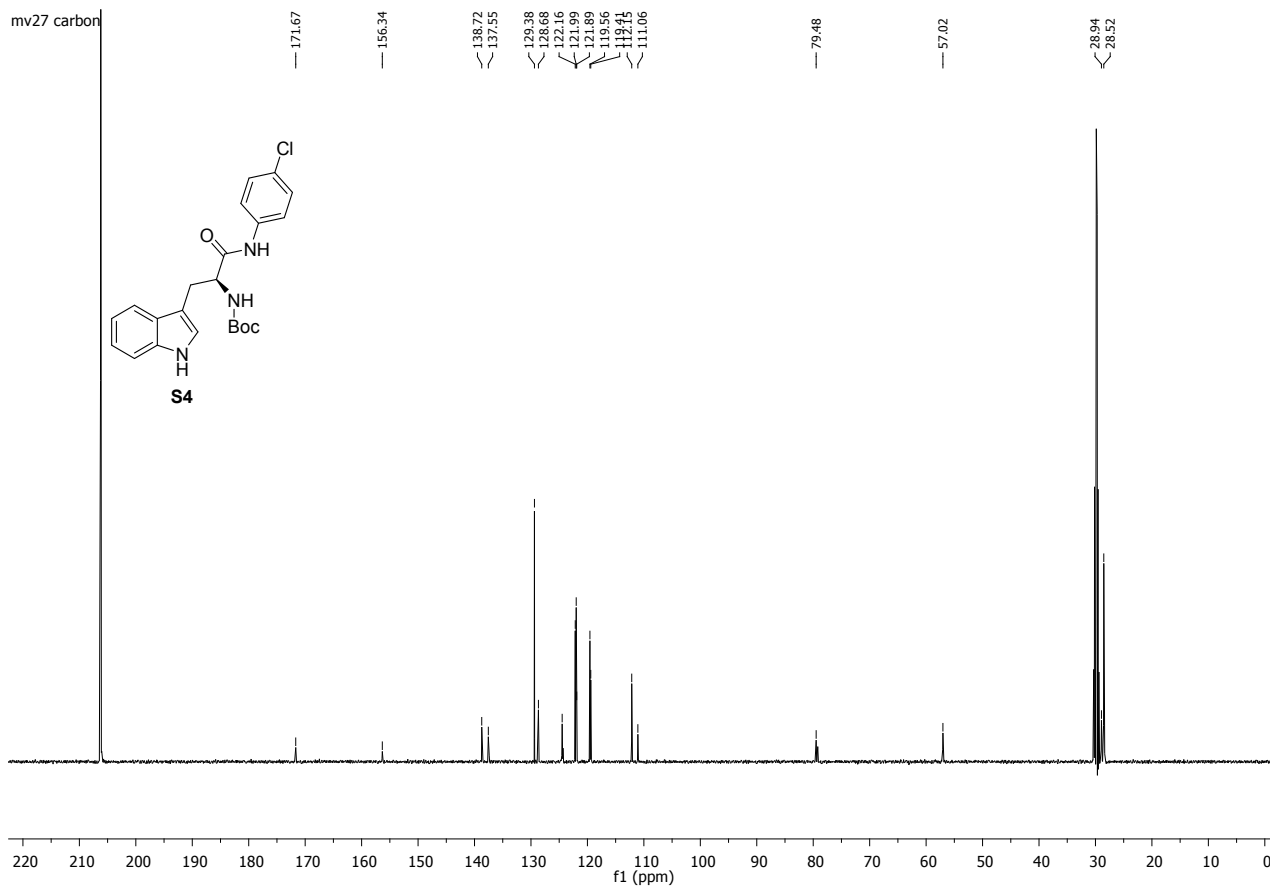



mv147

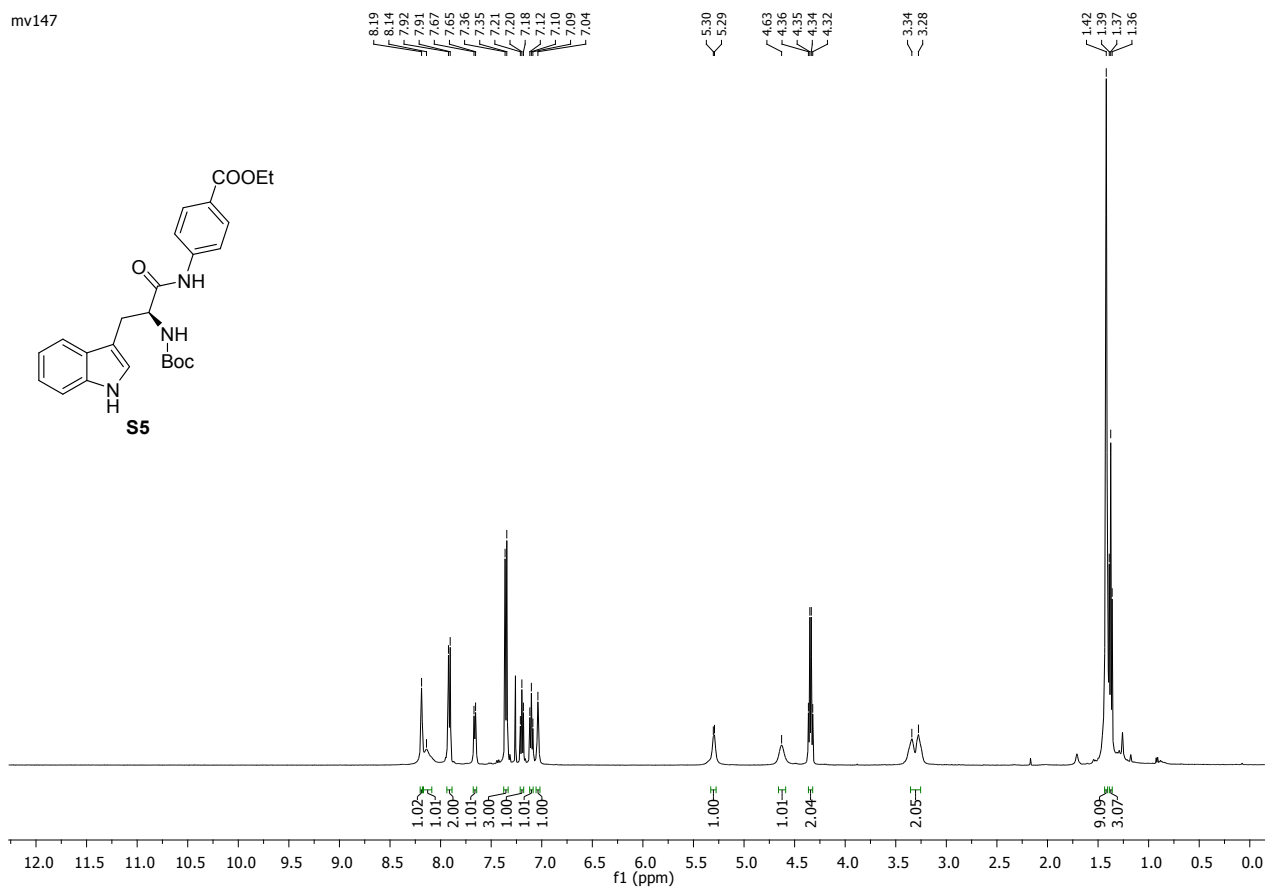

mv147 carbon

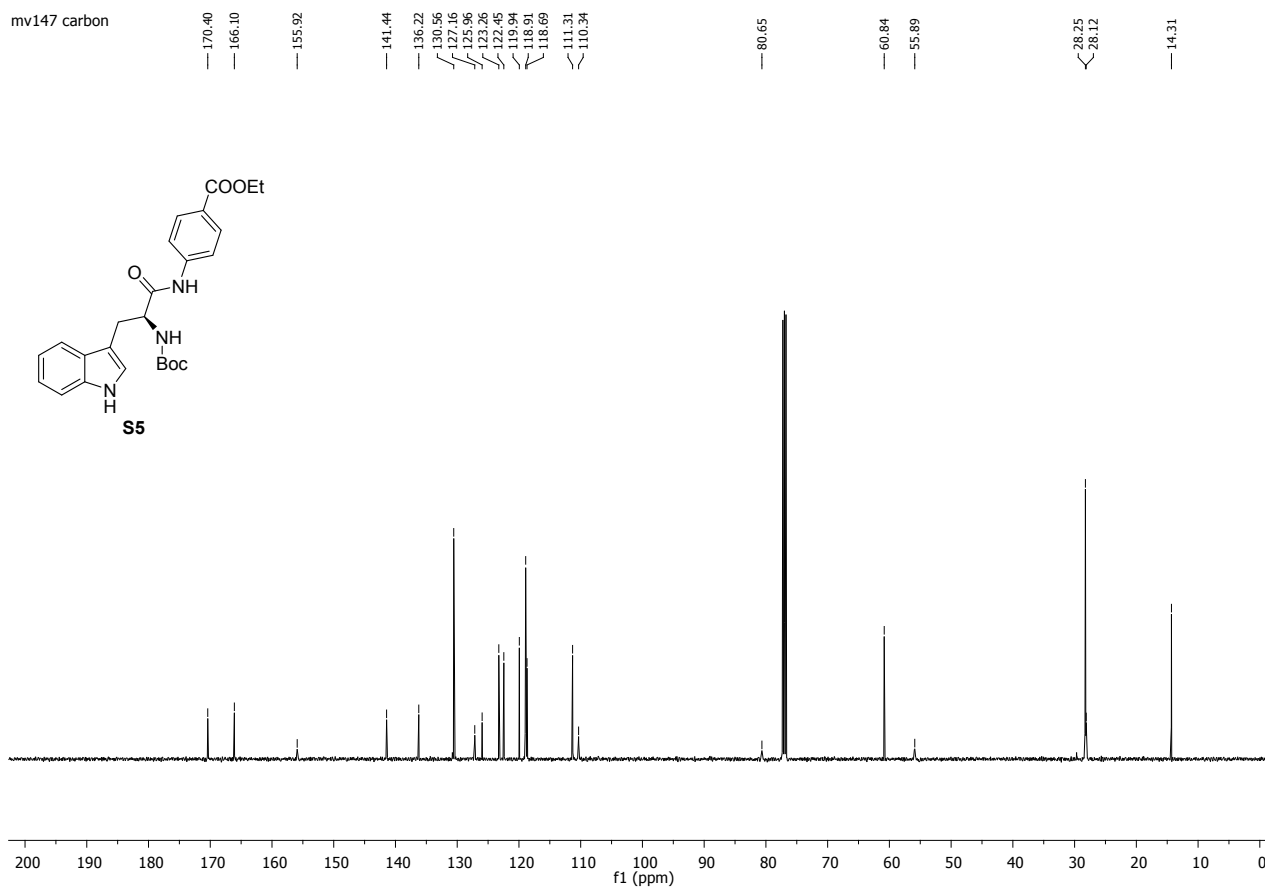

mv30 HCl salt

11.07  
10.89

8.42  
7.73  
7.71  
7.50  
7.49  
7.35  
7.34  
7.27  
7.26  
7.13  
7.08  
7.06  
7.05  
7.05  
6.96  
6.95  
6.93

4.26

3.37  
3.35  
3.34  
3.30  
3.29  
3.27

2.26

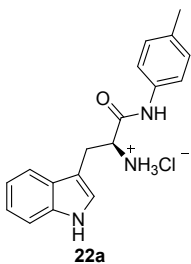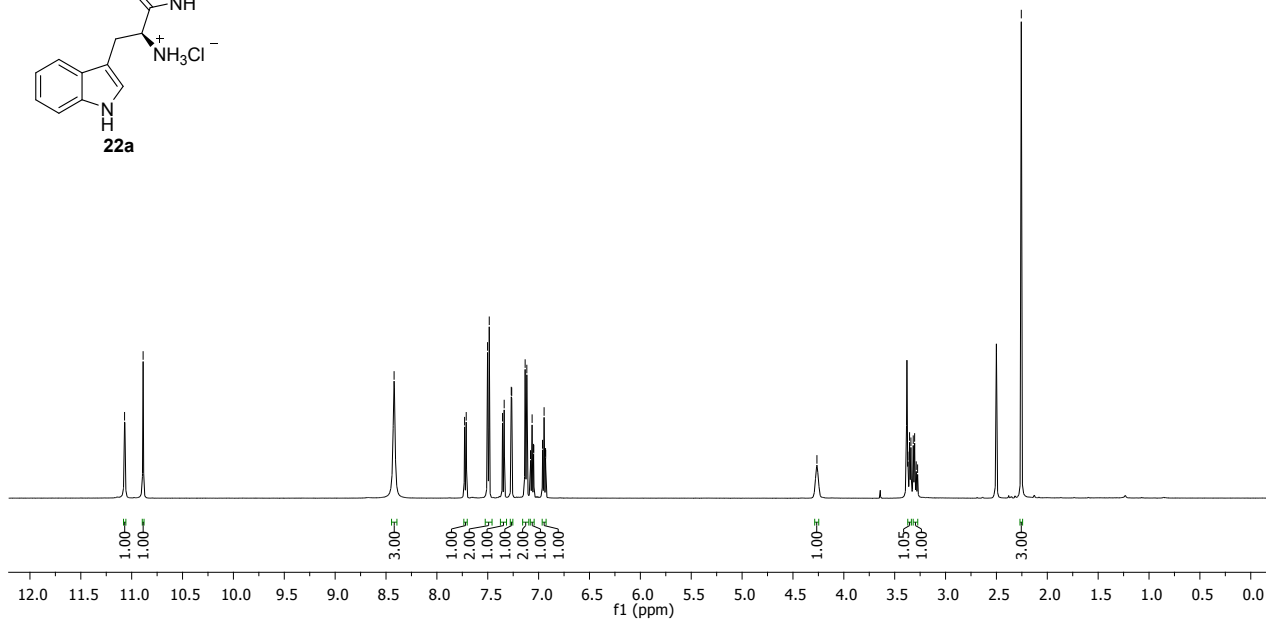

mv30 HCl salt carbon

166.96

136.16  
135.73  
132.91  
129.12  
127.44  
127.06  
121.96  
119.62  
118.65  
118.39  
111.36  
106.87

53.40

27.18

20.48

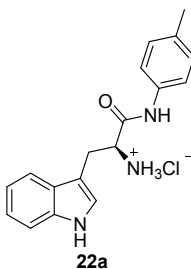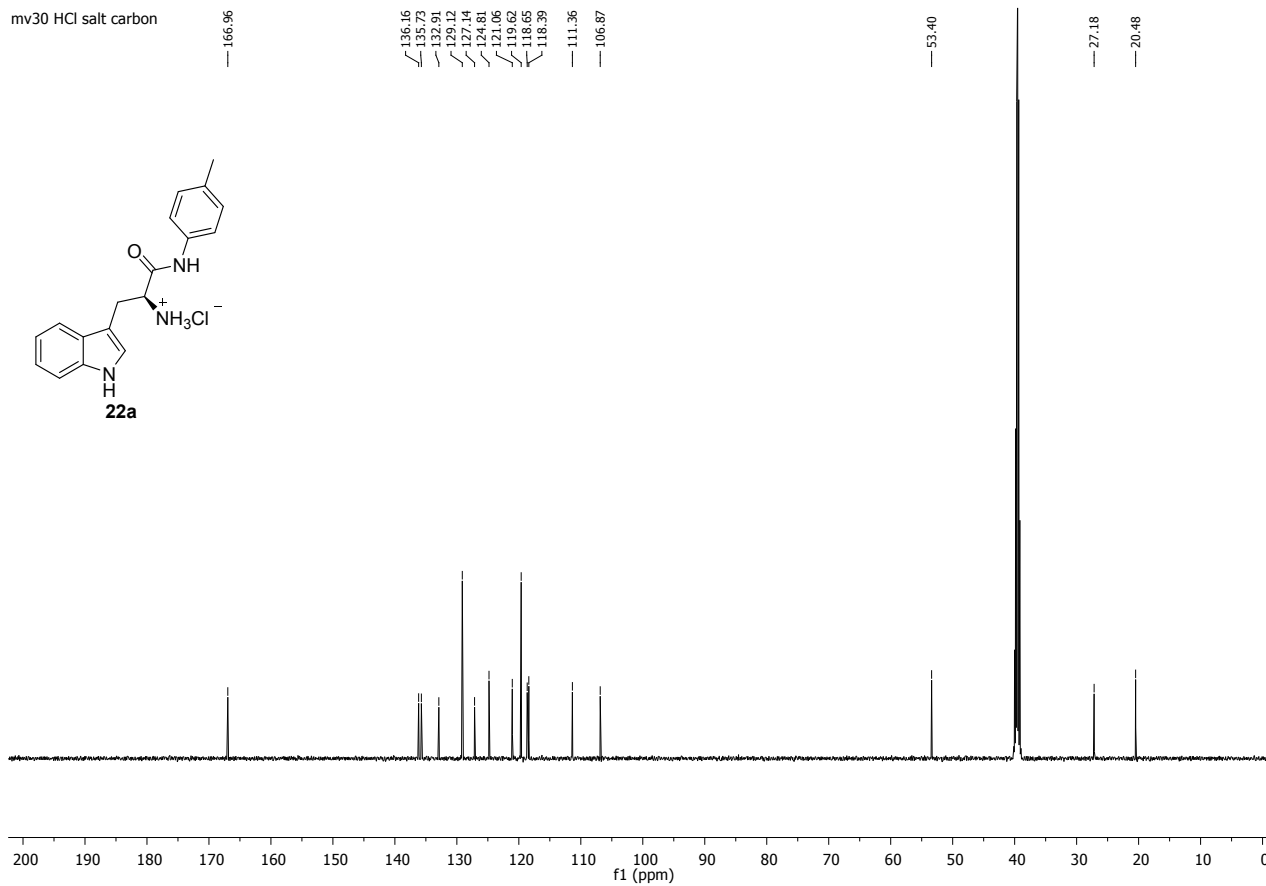

mv35 HCl salt<sup>+</sup>

11.14  
11.07

8.44  
7.73  
7.71  
7.65  
7.64  
7.64  
7.63  
7.53  
7.52  
7.38  
7.28  
7.19  
7.17  
7.15  
7.08  
7.06  
7.05  
6.95  
6.94  
6.92

4.28

3.40  
3.38  
3.37  
3.35  
3.33  
3.32  
3.30  
3.29

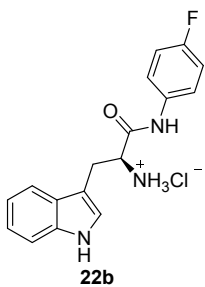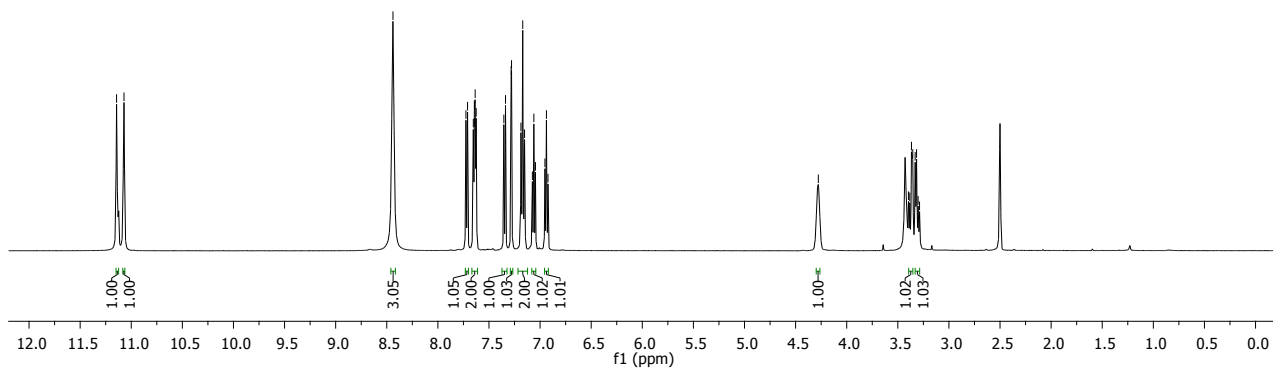

mv35 HCl salt carbon

167.15

159.29  
157.38

136.18  
134.66

127.13  
124.87  
121.43  
121.37  
121.07  
118.65  
118.40  
115.97  
115.29  
113.27  
106.81

53.42

27.16

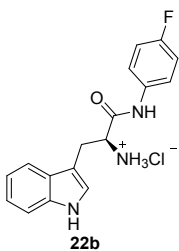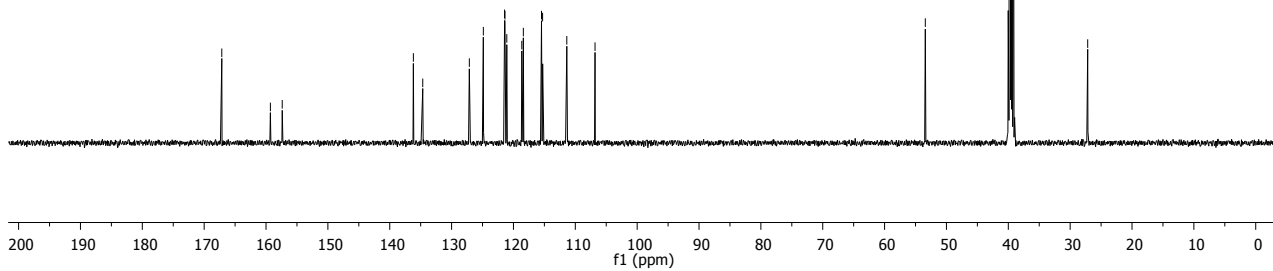

mv33 HCl salt  
11.72  
11.06

8.43  
7.72  
7.70  
7.66  
7.65  
7.40  
7.38  
7.35  
7.34  
7.27  
7.27  
7.07  
7.04  
6.95  
6.94  
6.92

4.29

3.38  
3.36  
3.35  
3.32  
3.31  
3.29  
3.28

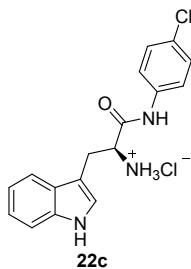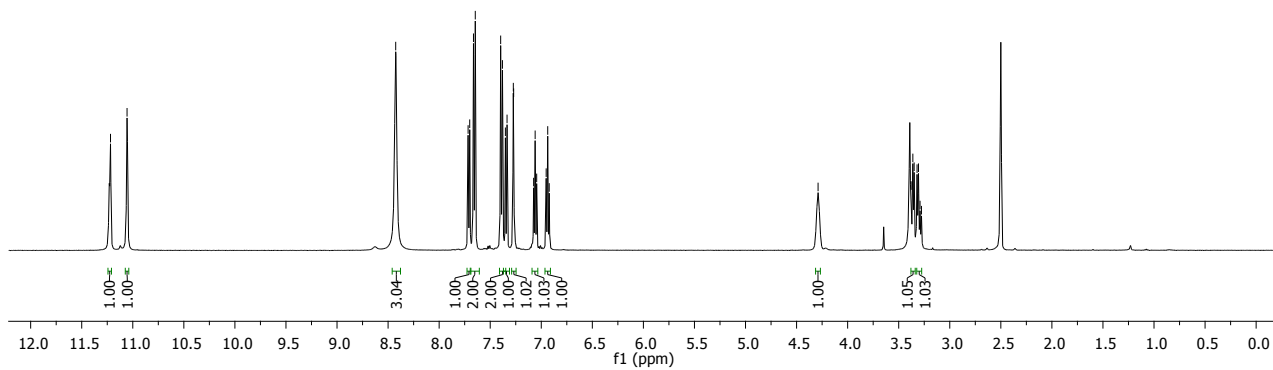

mv33 HCl salt carbon

167.41

137.21  
136.17  
128.70  
127.54  
127.10  
124.88  
121.14  
121.08  
118.62  
118.41  
111.37  
106.73

53.47

27.14

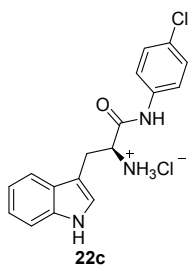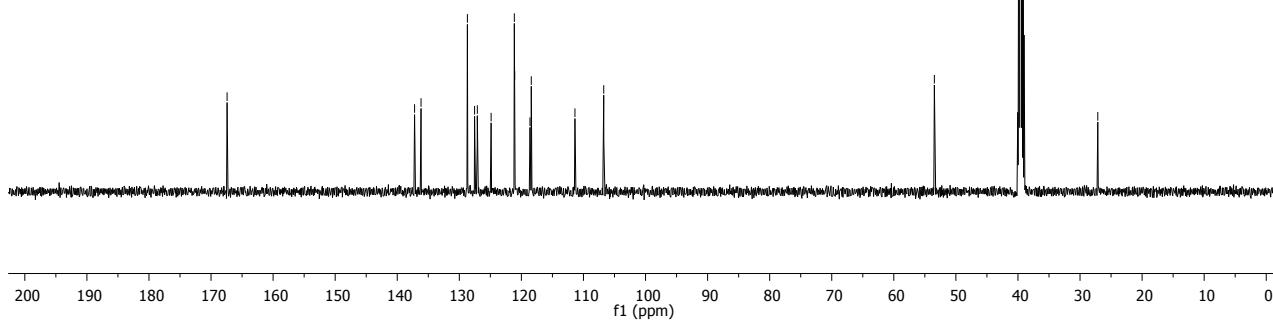

mv150 HCl  
11.91  
11.06  
11.06

8.45  
7.94  
7.92  
7.78  
7.76  
7.70  
7.35  
7.33  
7.28  
7.28  
7.07  
7.06  
7.04  
6.94  
6.93  
6.91

4.35  
4.34  
4.31  
4.30  
4.28  
4.27  
3.41  
3.40  
3.38  
3.35  
3.32  
3.30  
3.29

1.32  
1.31  
1.29

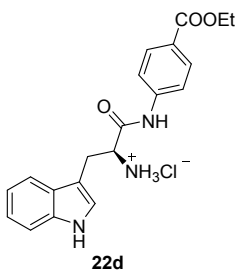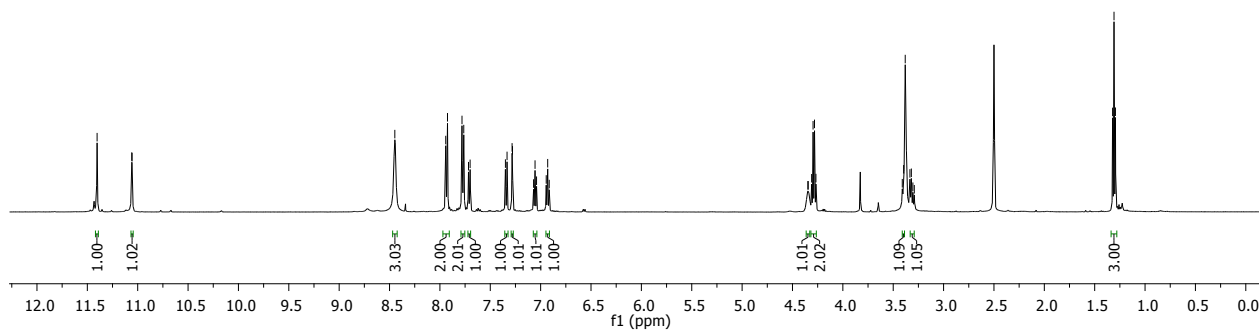

mv150 HCl salt carbon

167.89  
165.23  
142.54  
136.18  
130.19  
127.09  
124.92  
121.09  
119.04  
118.61  
118.42  
111.38  
106.67  
60.52  
53.56  
27.11  
14.21

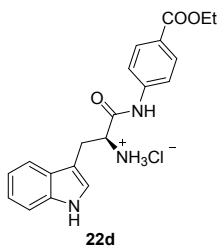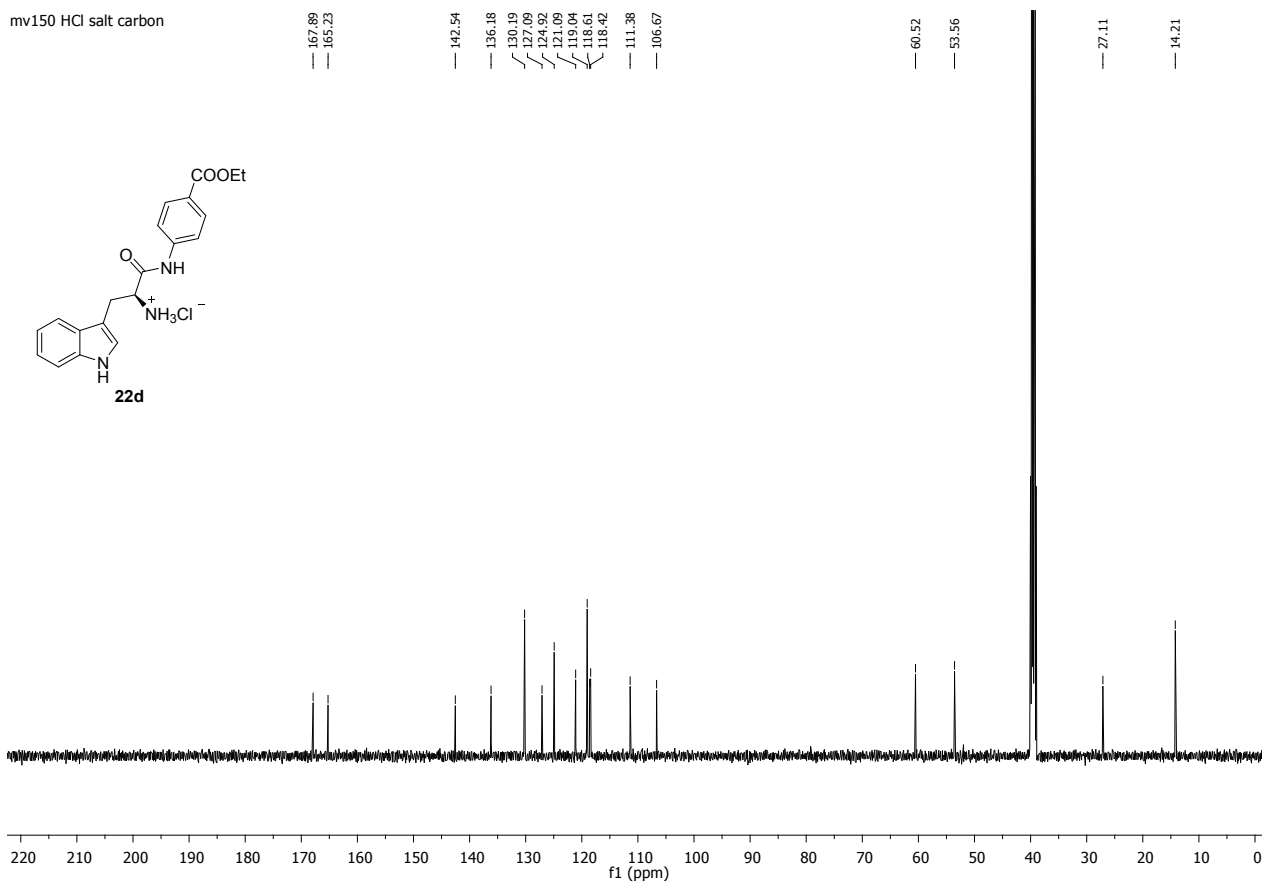



mv54

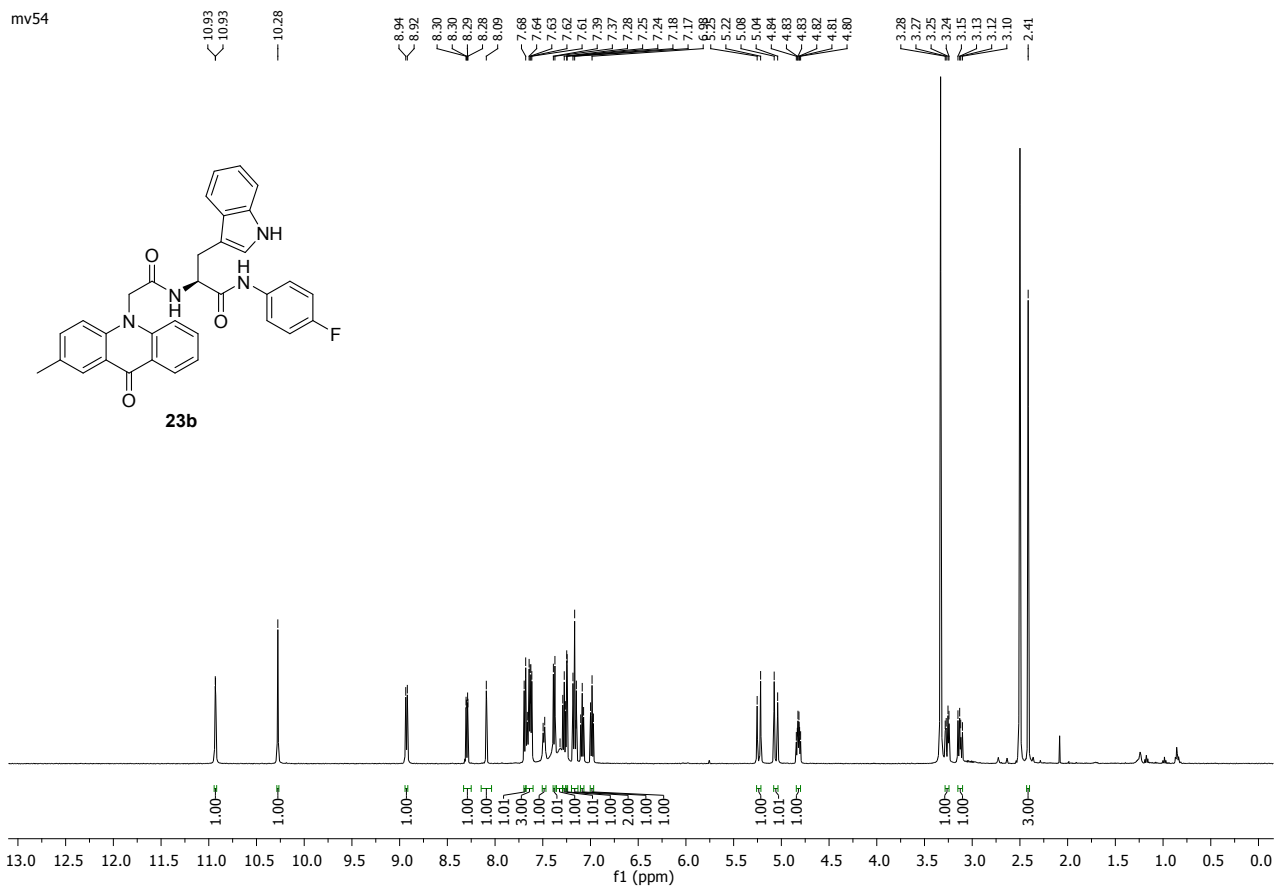

mv54 carbon

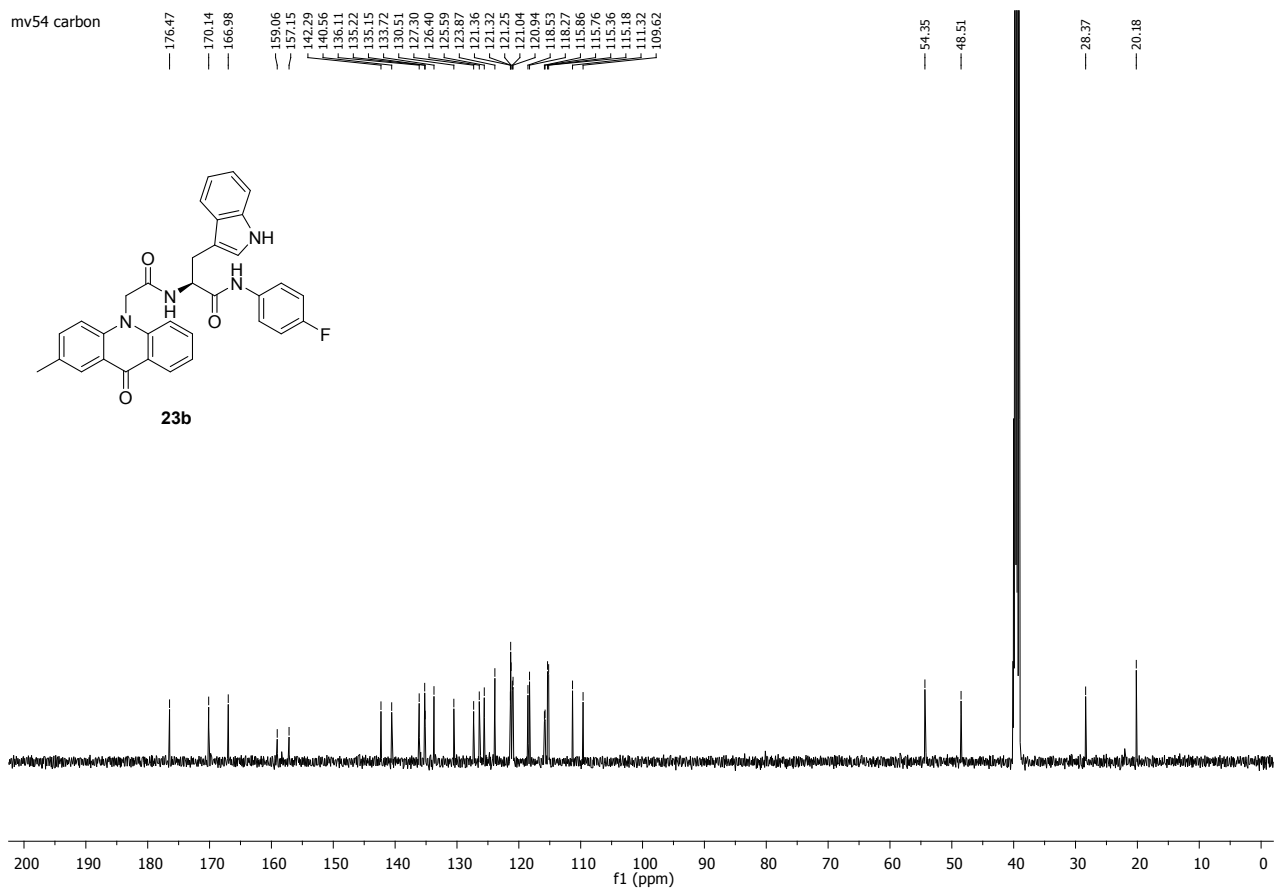





mv153

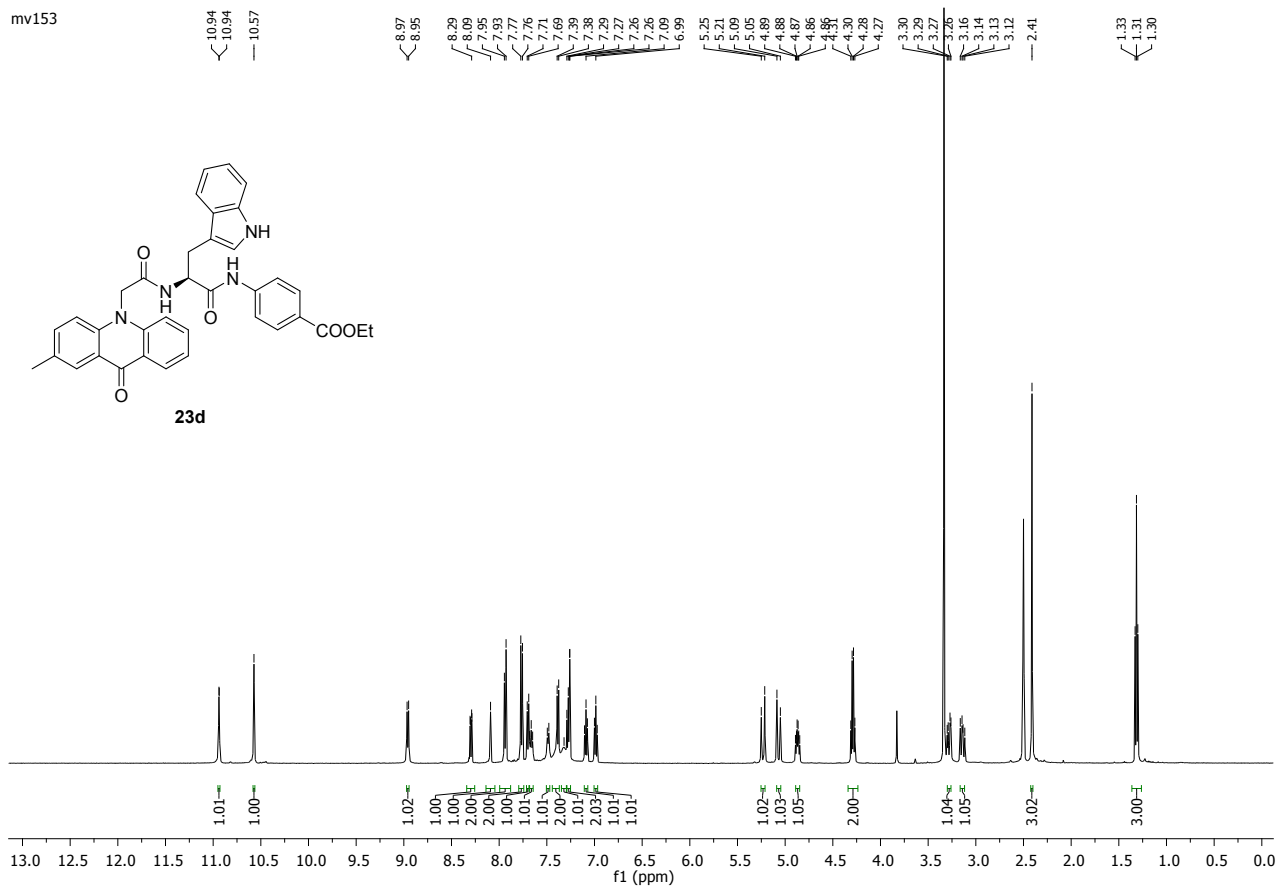

mv153 carbon

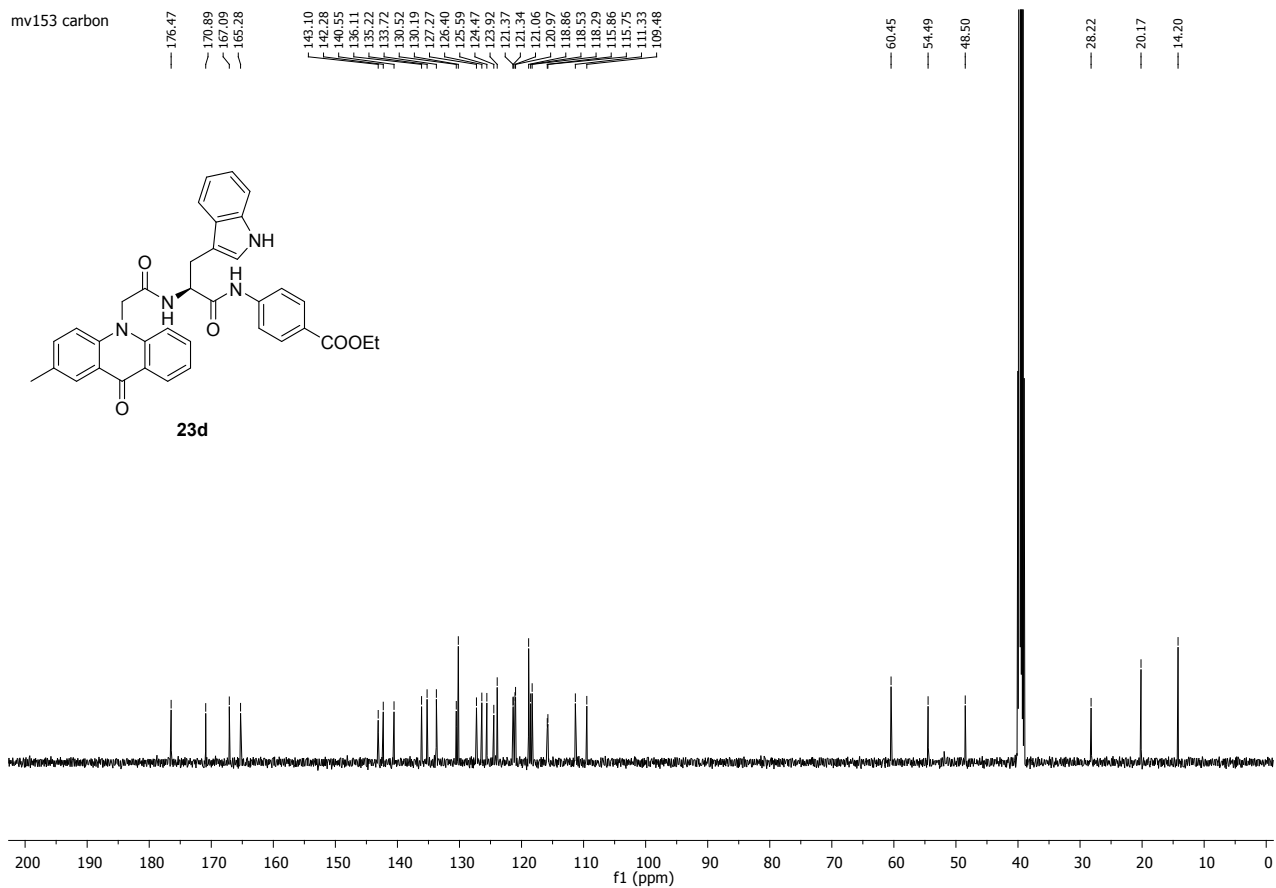

Analytical method for compounds **9a-i** and **10**:

LC-MS/HPLC: LC-20AD Shimadzu connected to Shimadzu LCMS-2010EV

Mobile Phase A: 0.1% FA in water

Mobile Phase B: methanol

HPLC column: Poroshell 120 EC-C18, 4.6 x 100 mm, 2.7  $\mu$ m

Flow rate: 0.4 mL/min

Run time: 20 min

Column temperature: 26°C

UV detector: 254 nm

MS detector: 1.65 kV

LC isocratic:

| Time (min) | Mobile Phase A (%) | Mobile Phase B (%) |
|------------|--------------------|--------------------|
| 0          | 0                  | 100                |
| 20         | 0                  | 100                |

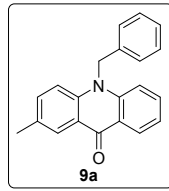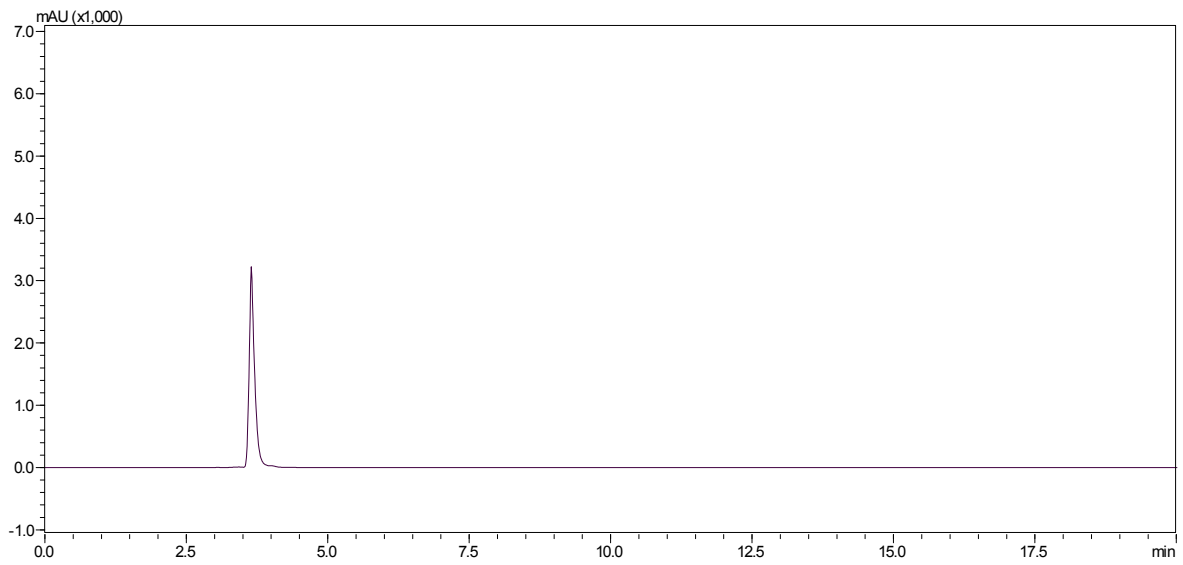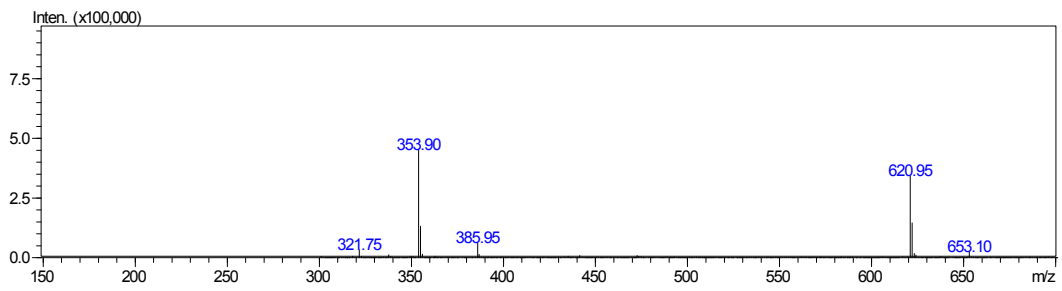

ESI-MS, positive mode:  $m/z$  calcd mass for  $C_{22}H_{21}NO_2Na$   $[M + MeOH + Na]^+ = 454.15$ ; found 353.90.

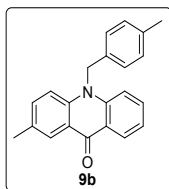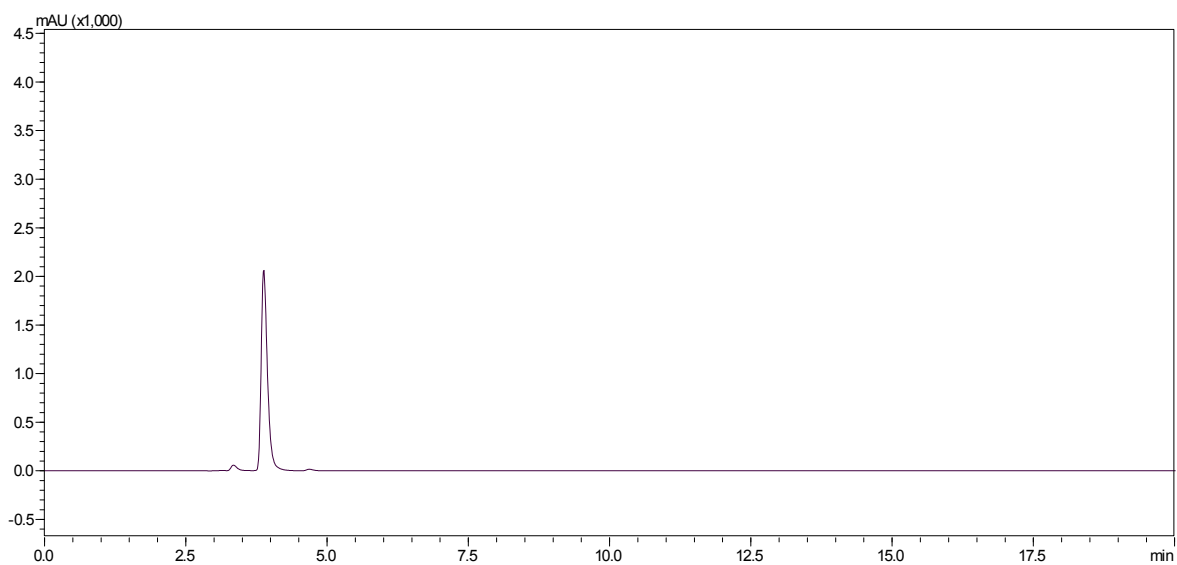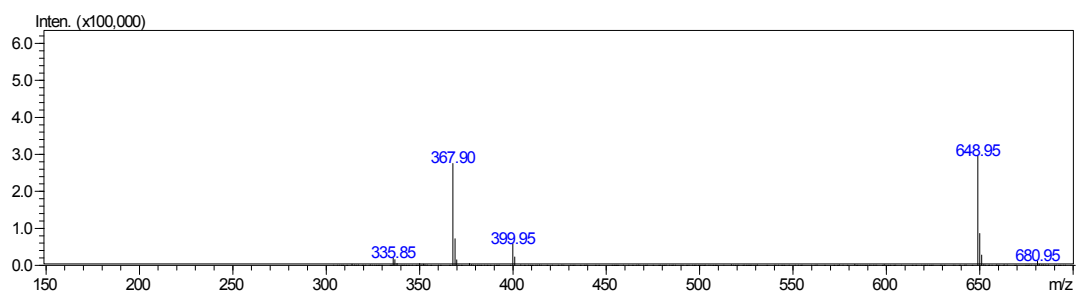

ESI-MS, positive mode:  $m/z$  calcd mass for  $C_{23}H_{23}NO_2Na$   $[M + MeOH + Na]^+ = 368.16$ ; found 367.90.

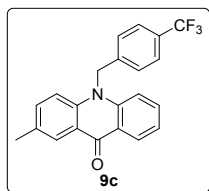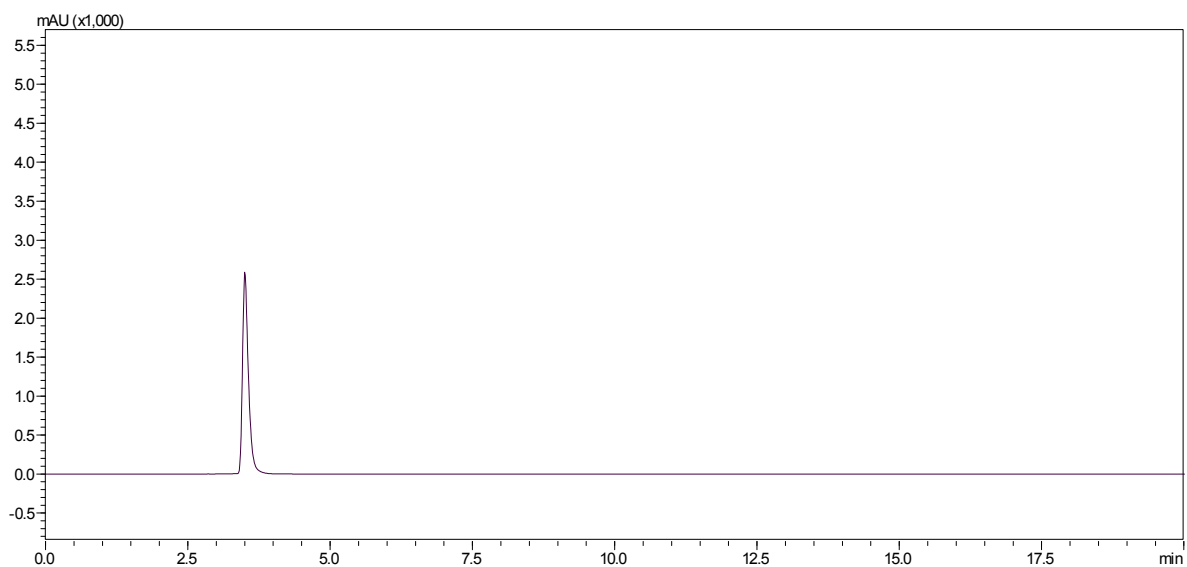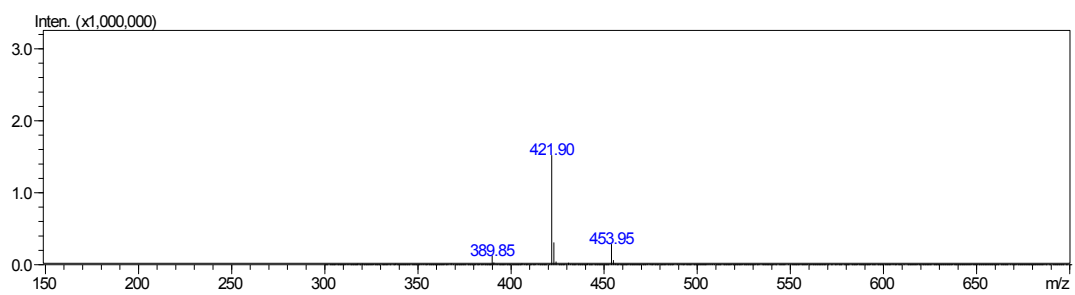

ESI-MS, positive mode: m/z calcd mass for  $C_{23}H_{20}F_3NO_2Na$   $[M + MeOH + Na]^+$  = 422.13; found 421.90.

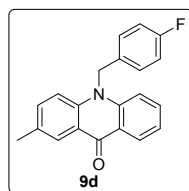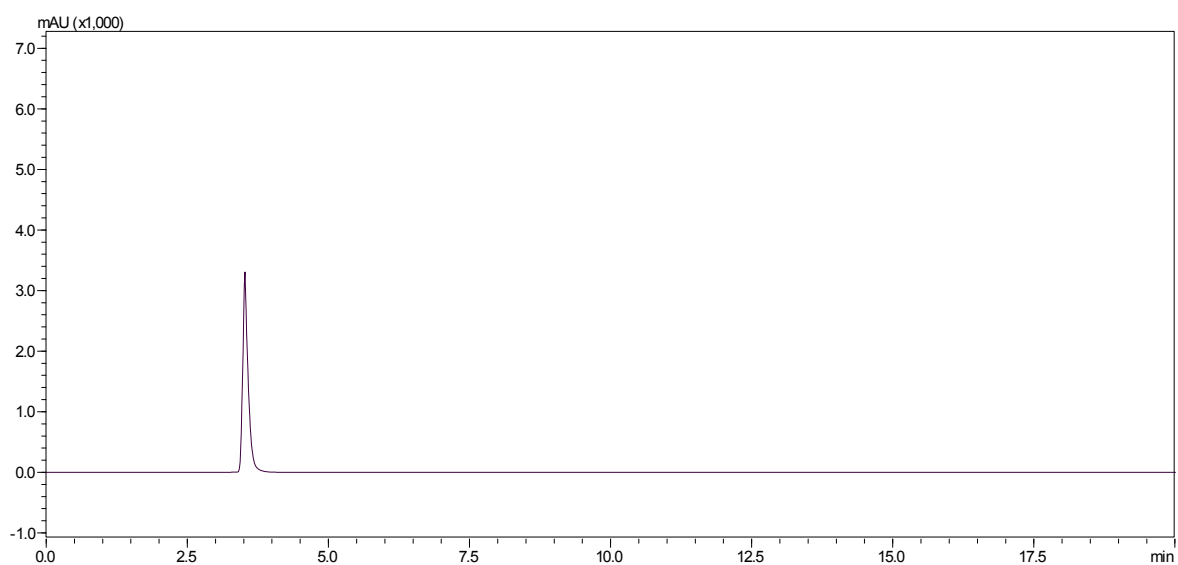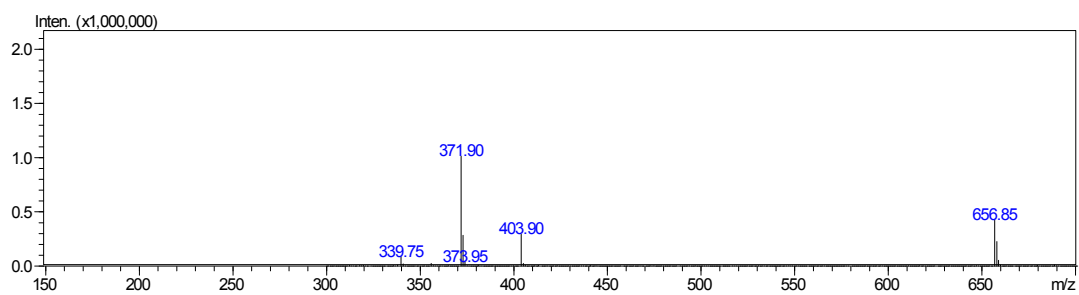

ESI-MS, positive mode: m/z calcd mass for  $C_{22}H_{20}FNO_2Na$   $[M + MeOH + Na]^+ = 372.14$ ; found 371.90.

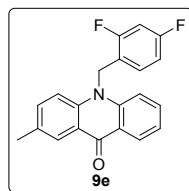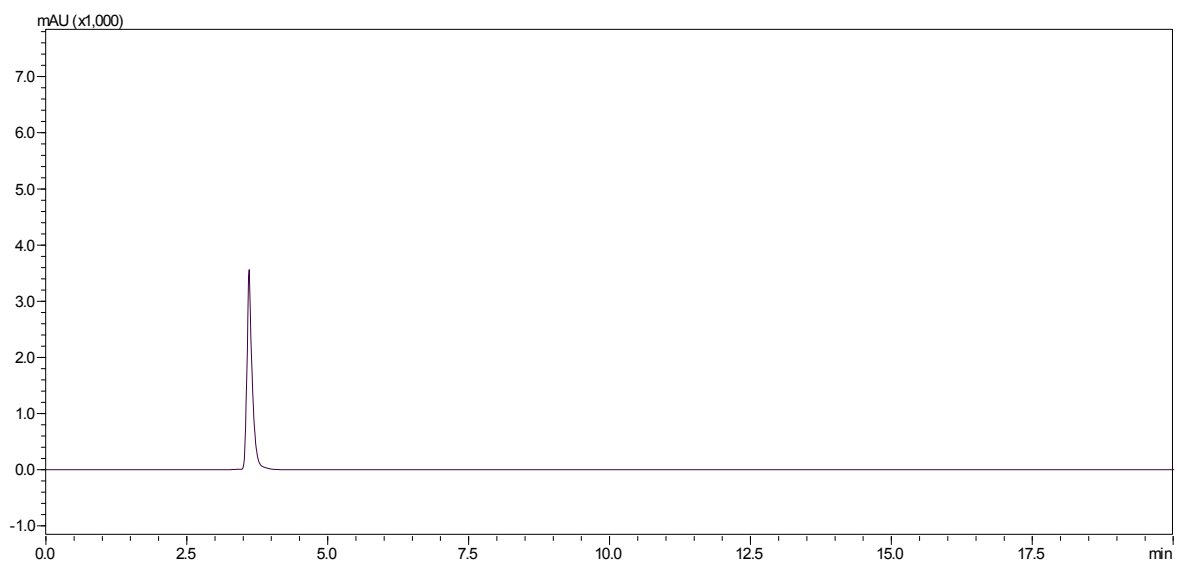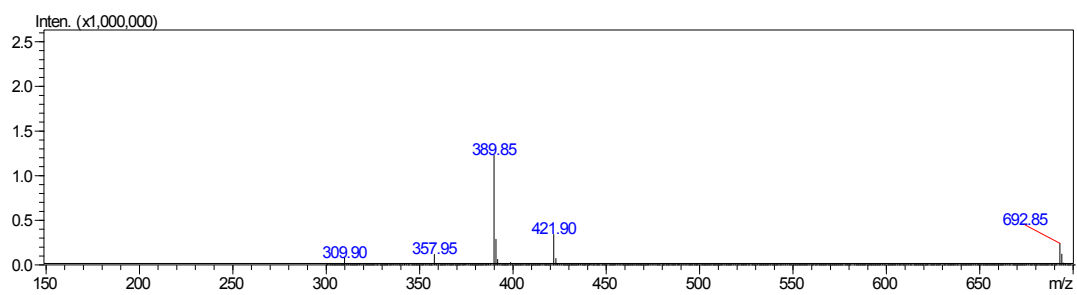

ESI-MS, positive mode:  $m/z$  calcd mass for  $C_{22}H_{19}F_2NO_2Na$   $[M + MeOH + Na]^+ = 390.13$ ; found 389.85.

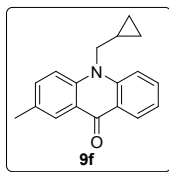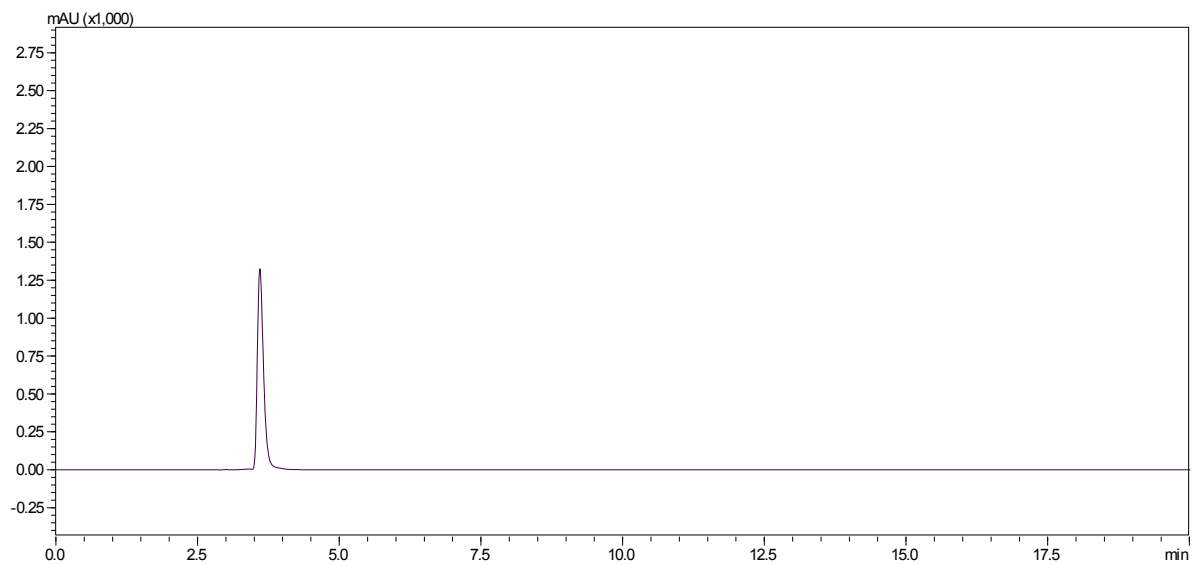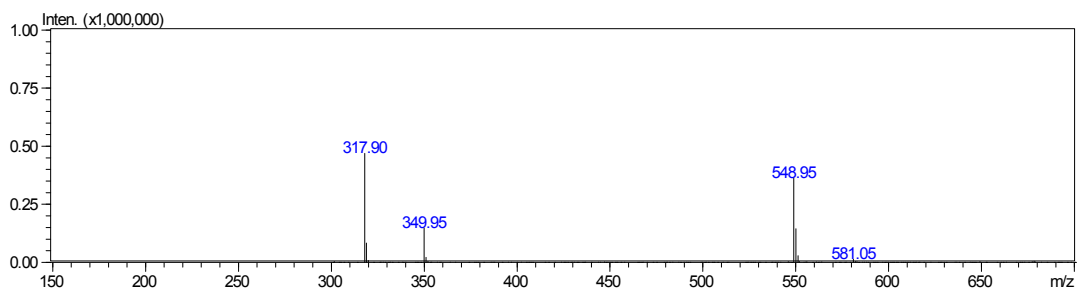

ESI-MS, positive mode: m/z calcd mass for  $C_{19}H_{21}NO_2Na$   $[M + MeOH + Na]^+$  = 318.15; found 317.90.



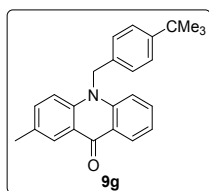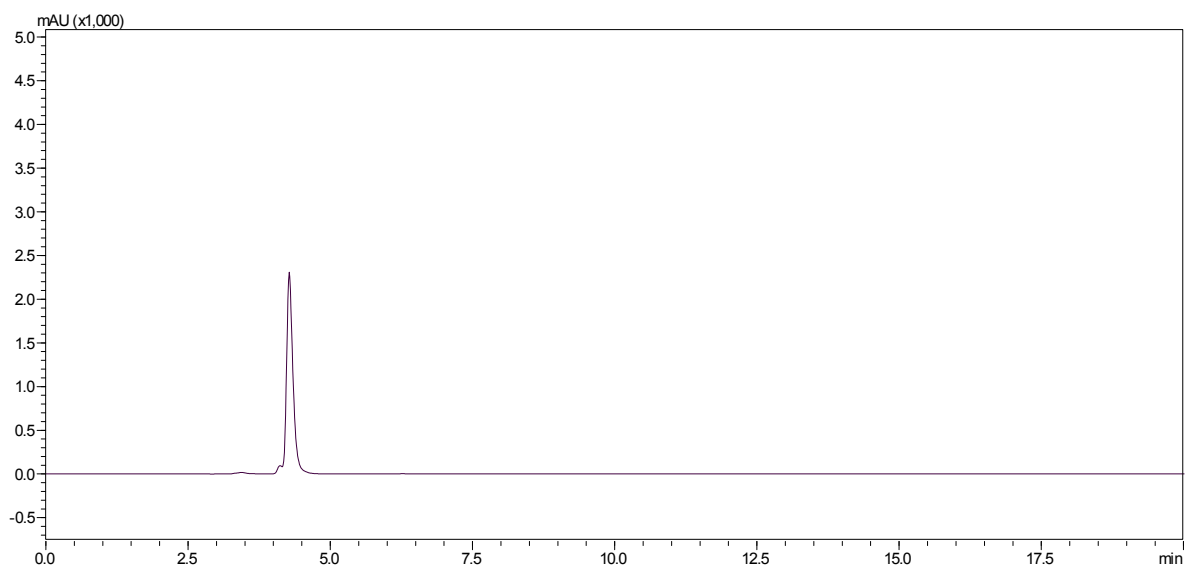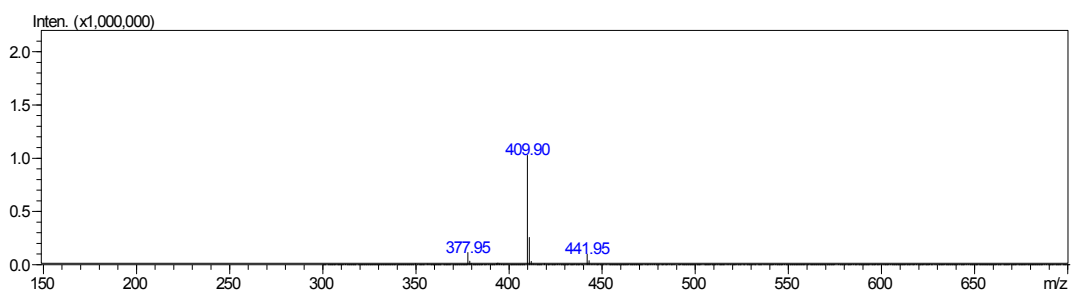

ESI-MS, positive mode:  $m/z$  calcd mass for  $C_{26}H_{29}NO_2Na$   $[M + MeOH + Na]^+ = 410.21$ ; found 409.90.

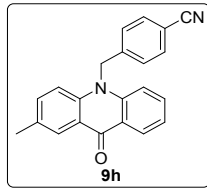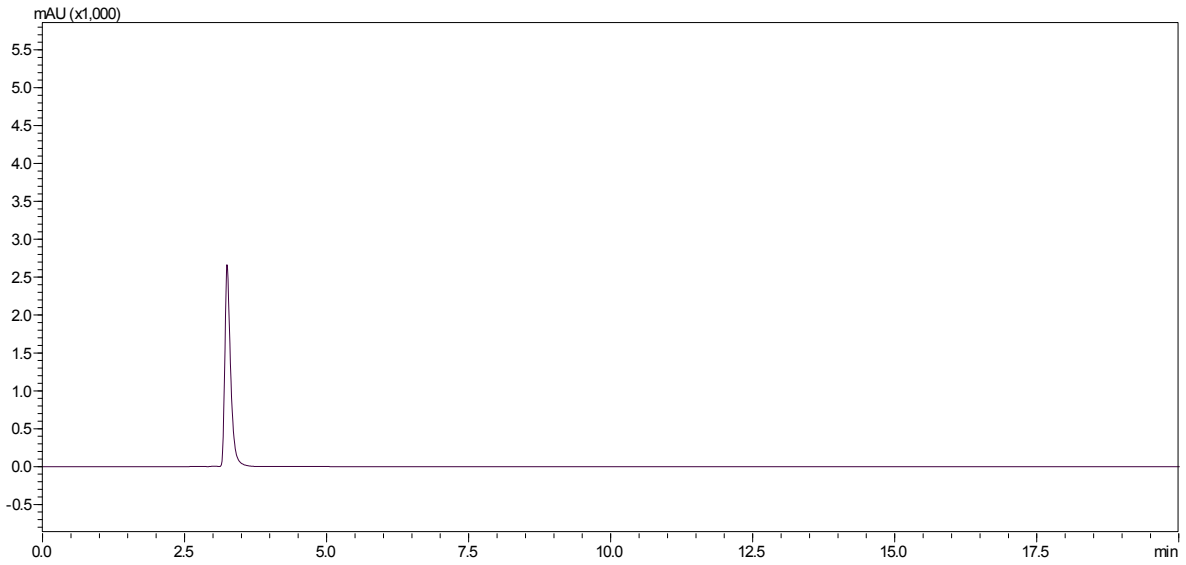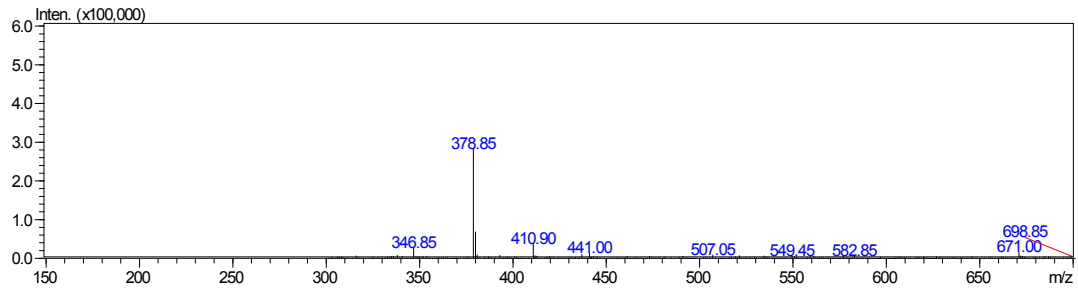

ESI-MS, positive mode: m/z calcd mass for  $C_{23}H_{20}N_2O_2Na$   $[M + MeOH + Na]^+$  = 379.14; found 378.85.

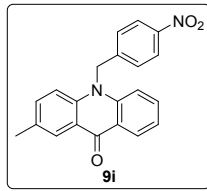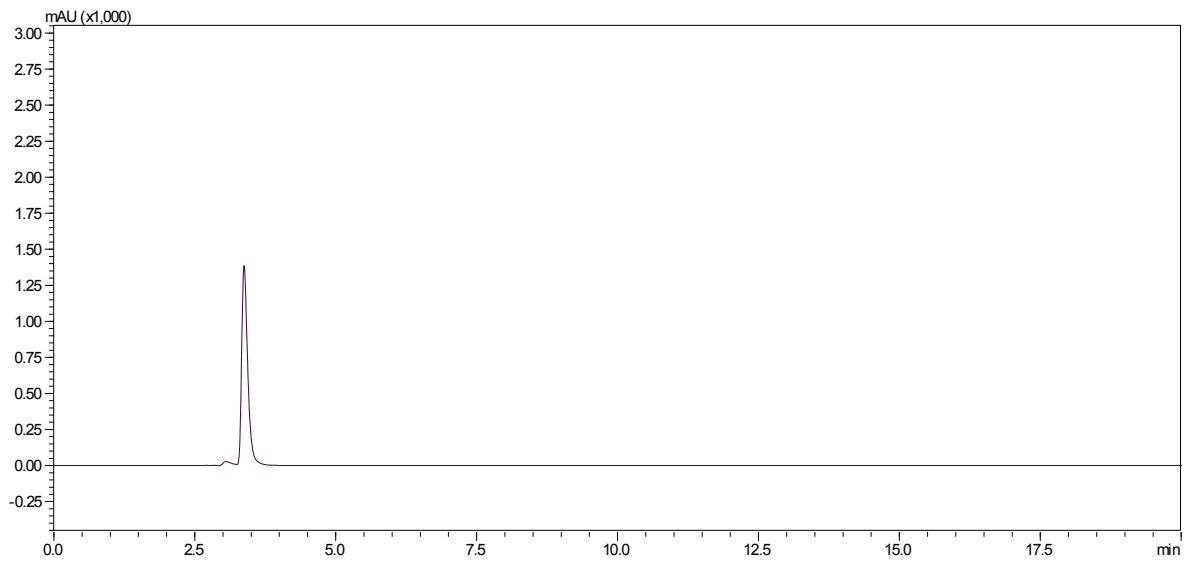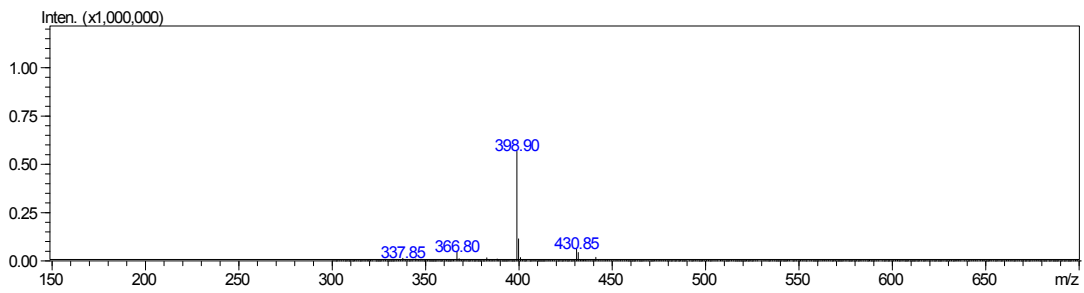

ESI-MS, positive mode: m/z calcd mass for  $C_{22}H_{20}N_2O_4Na$   $[M + MeOH + Na]^+ = 399.13$ ; found 398.90.

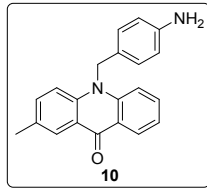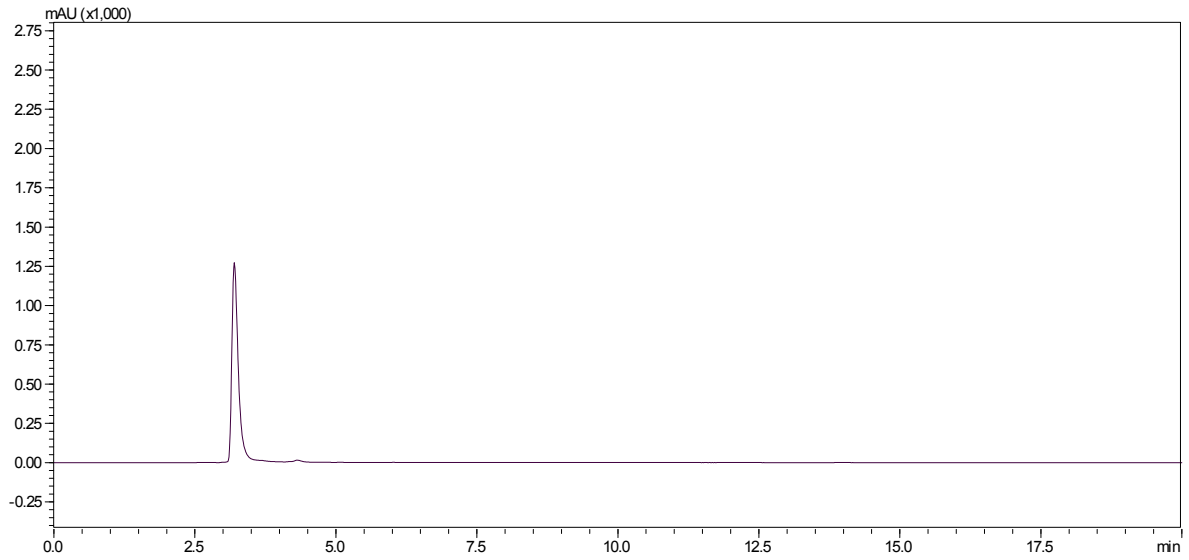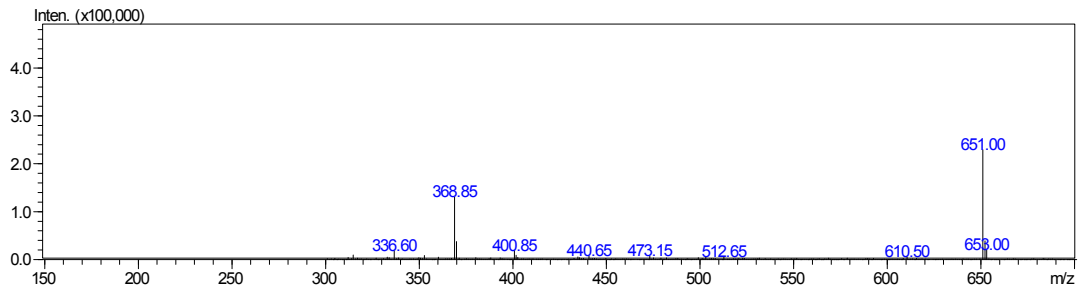

ESI-MS, positive mode: m/z calcd mass for  $C_{22}H_{22}N_2O_2Na$   $[M + MeOH + Na]^+ = 369.16$ ; found 368.85.

Analytical method for compounds **S1**, **15a-d** and **16a-h**:

LC-MS/HPLC: LC-20AD Shimadzu connected to Shimadzu LCMS-2010EV

Mobile Phase A: 0.1% FA in water

Mobile Phase B: methanol

HPLC column: SUPELCO Discovery C18 25 cm x 4.6 mm, 5  $\mu$ m

Flow rate: 0.4 mL/min

Run time: 20 min

Column temperature: 26°C

UV detector: 254 nm

MS detector: 1.65 kV

LC isocratic:

| Time (min) | Mobile Phase A (%) | Mobile Phase B (%) |
|------------|--------------------|--------------------|
| 0          | 0                  | 100                |
| 20         | 0                  | 100                |

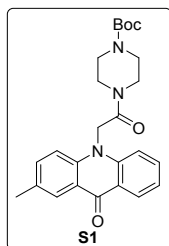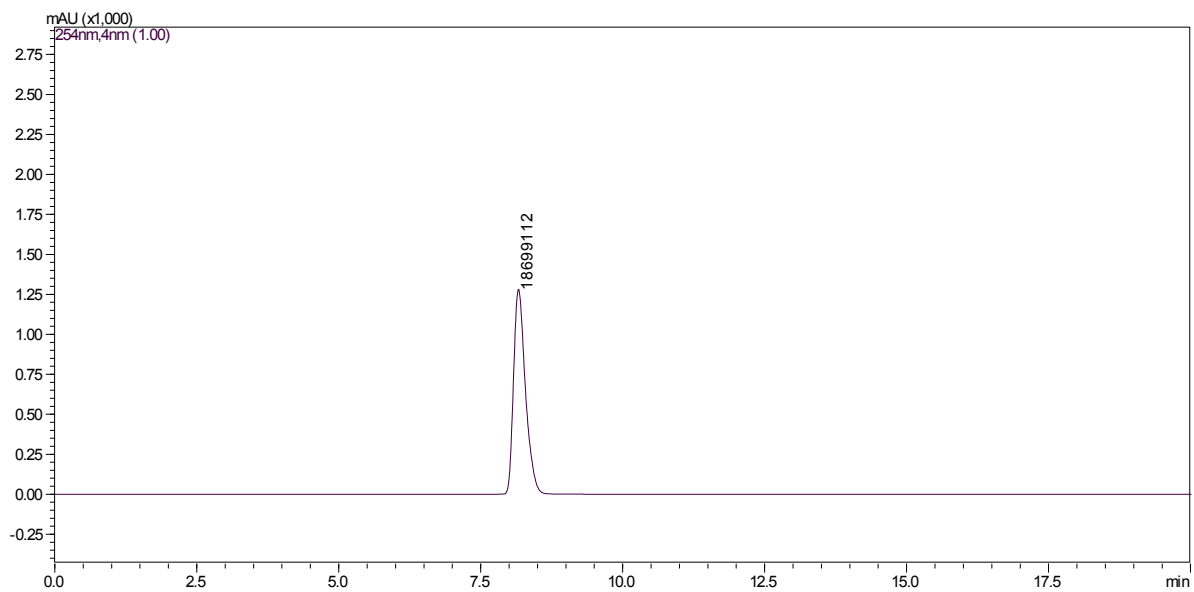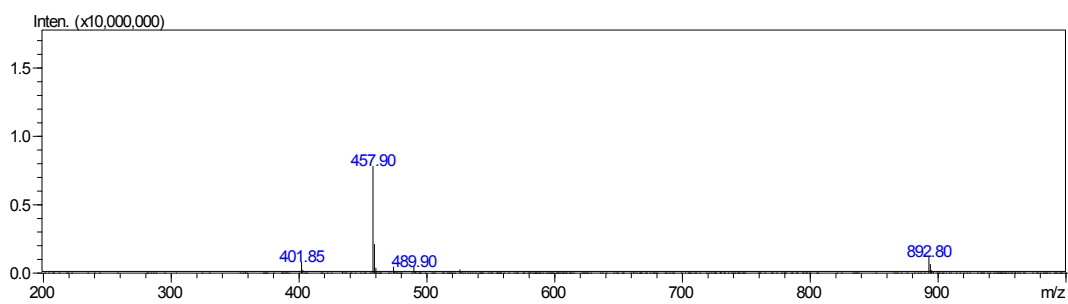

ESI-MS, positive mode: m/z calcd mass for  $C_{25}H_{29}N_3O_4Na$   $[M + Na]^+ = 458.20$ ; found 457.90.

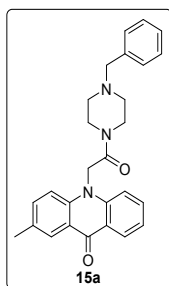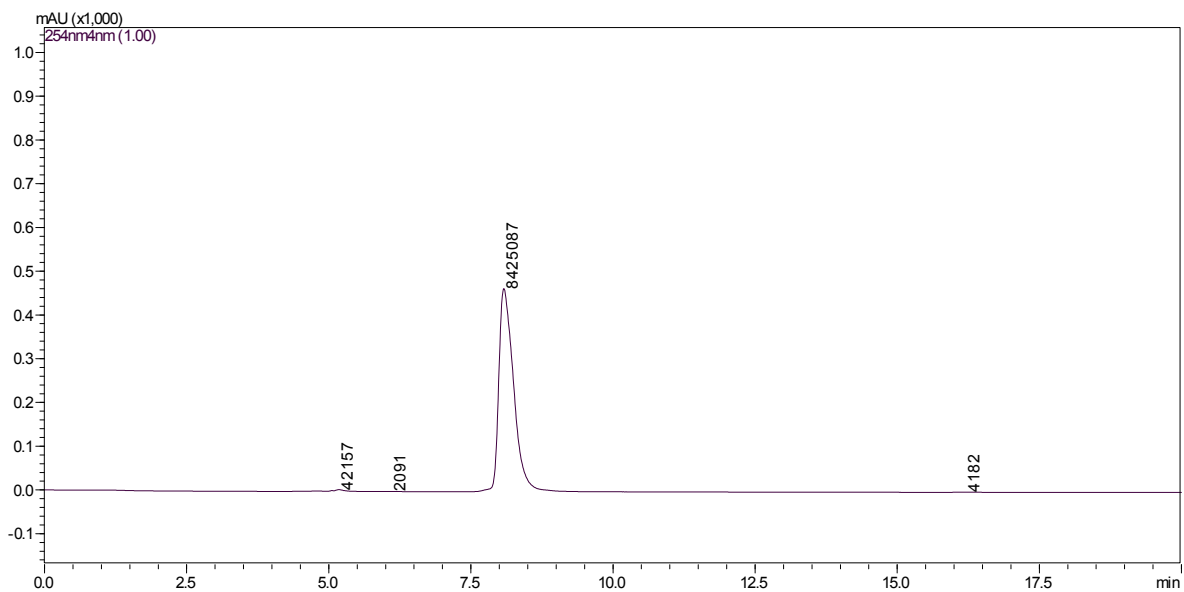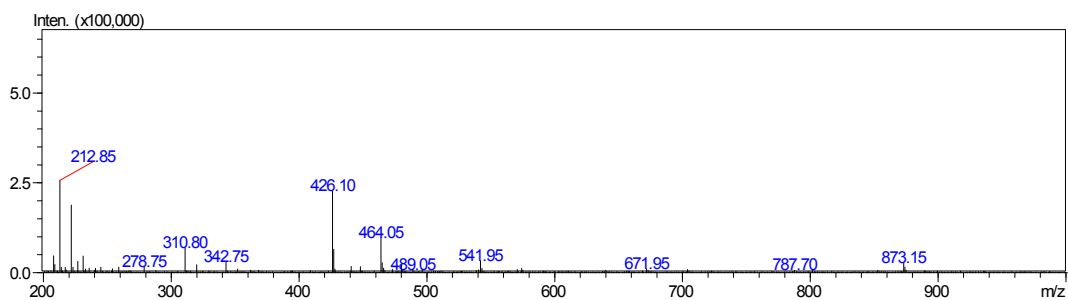

ESI-MS, positive mode: m/z calcd mass for  $C_{27}H_{28}N_3O_2$   $[M + H]^+$  = 426.22; found 426.10.

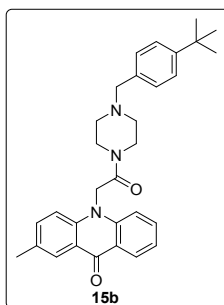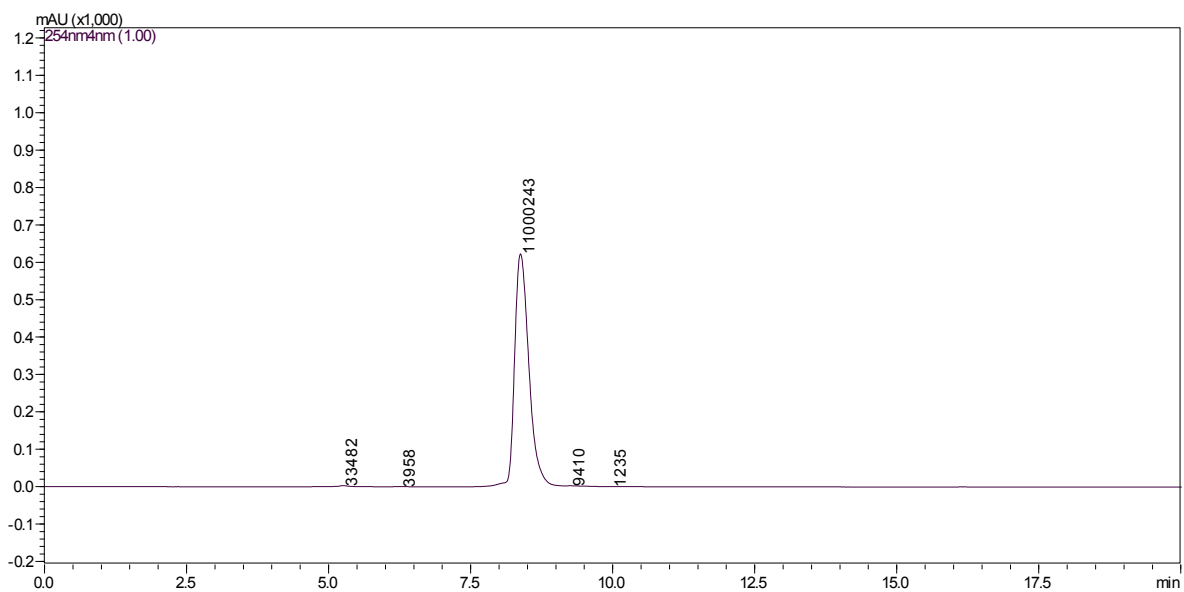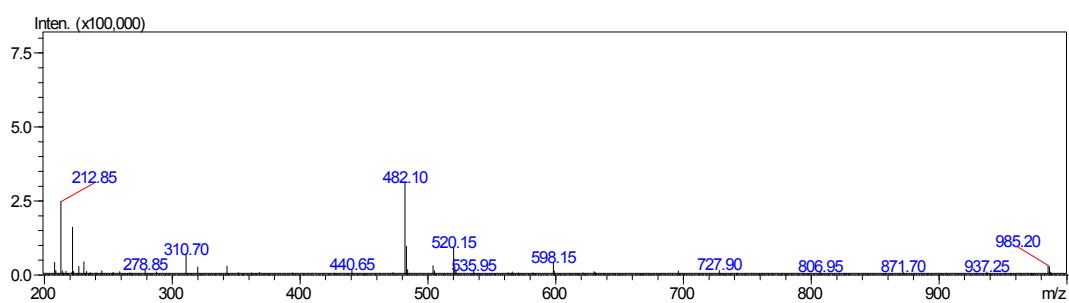

ESI-MS, positive mode: m/z calcd mass for  $C_{31}H_{36}N_3O_2$   $[M + H]^+$  = 482.28; found 482.10.



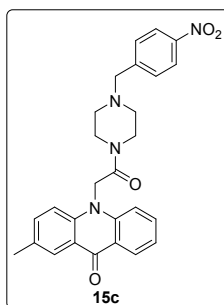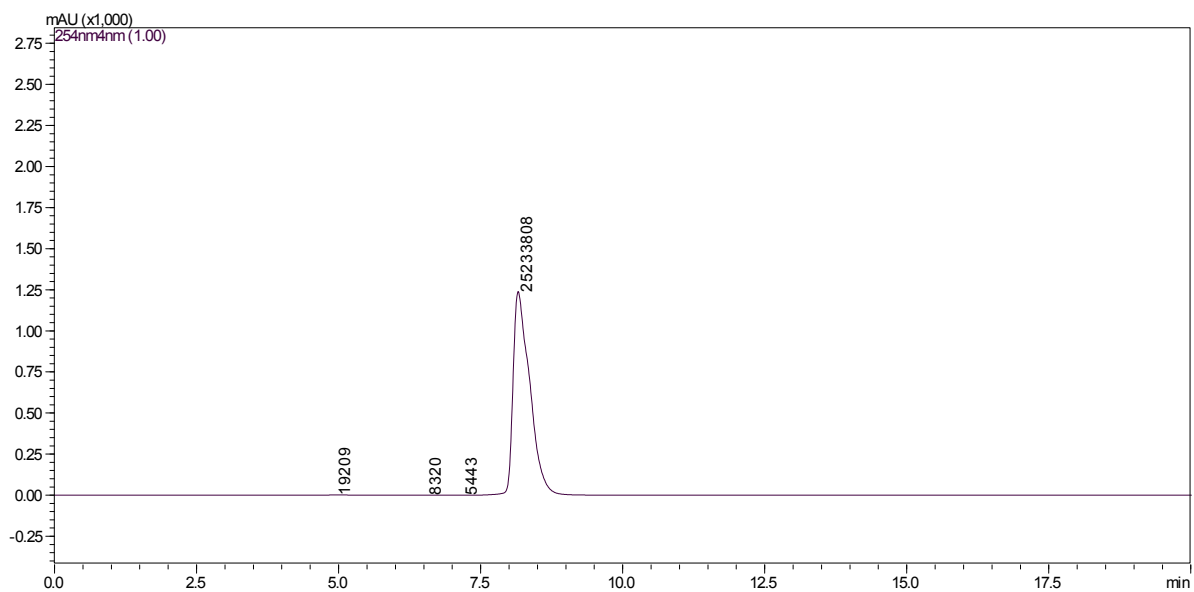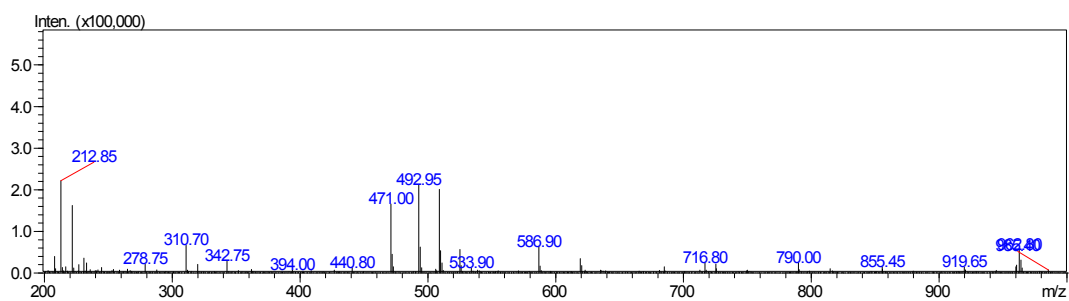

ESI-MS, positive mode: m/z calcd mass for  $C_{27}H_{27}N_4O_4$   $[M + H]^+$  = 471.20; found 471.00.

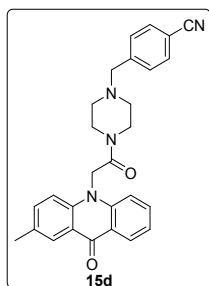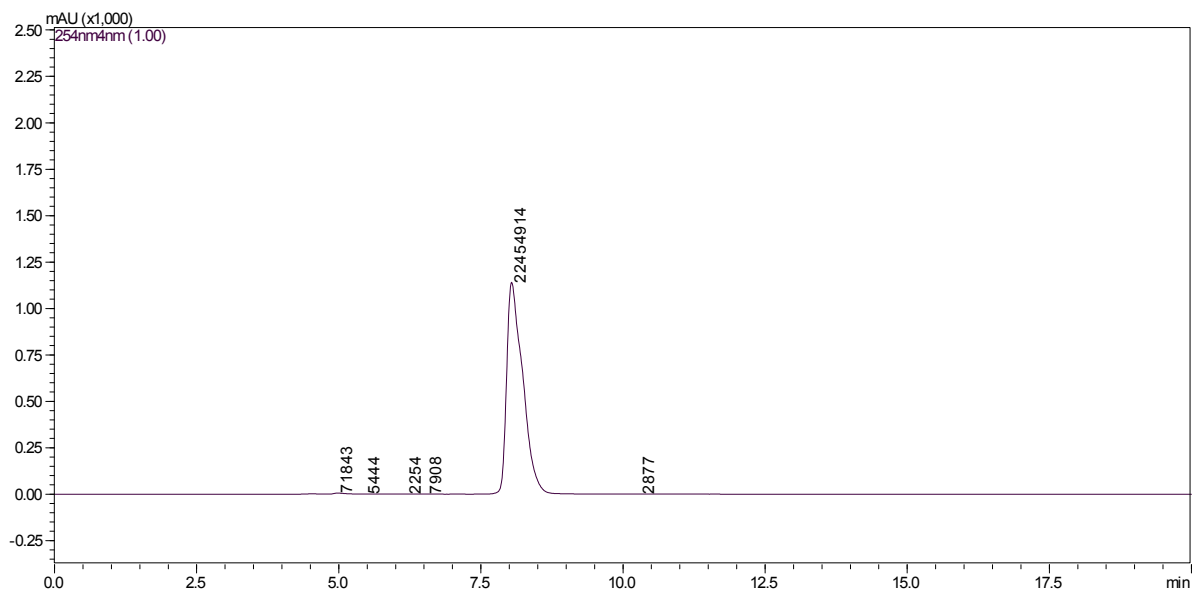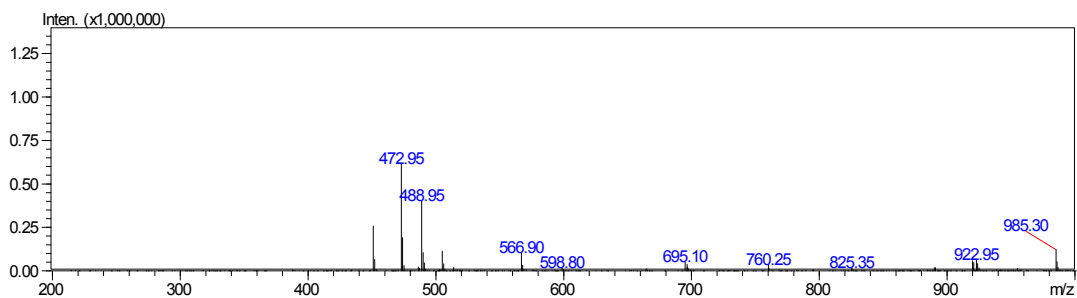

ESI-MS, positive mode: m/z calcd mass for  $C_{28}H_{26}N_4O_2Na$   $[M + Na]^+ = 473.19$ ; found 472.95.

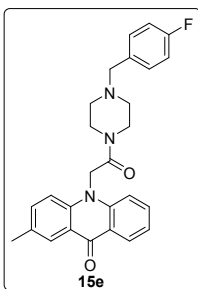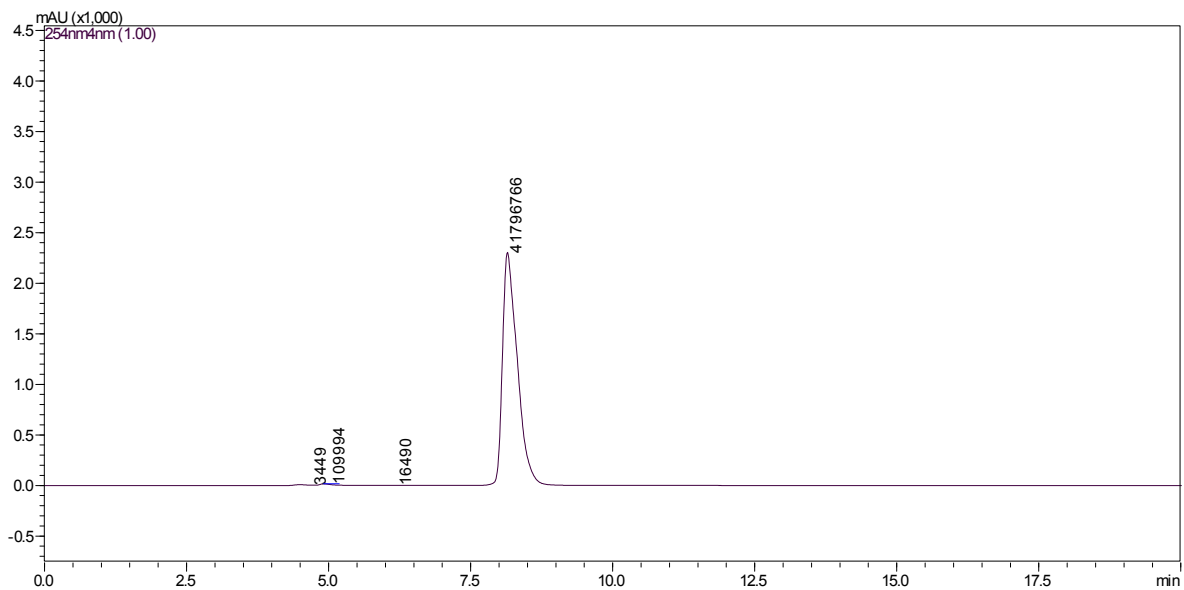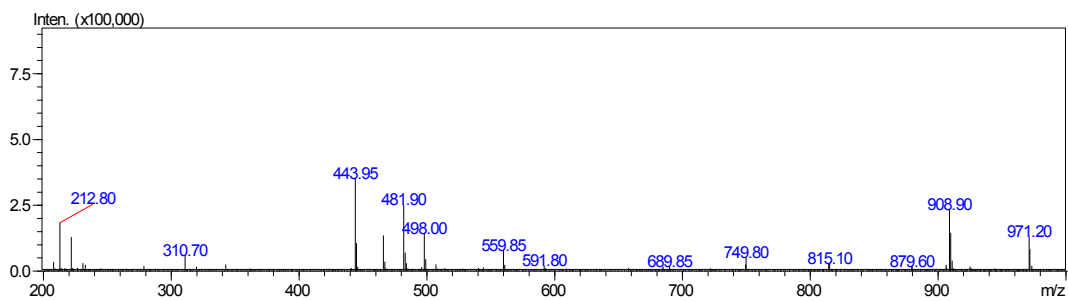

ESI-MS, positive mode: m/z calcd mass for  $C_{27}H_{27}FN_3O_2$   $[M + H]^+ = 444.21$ ; found 441.95.

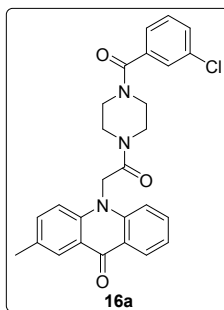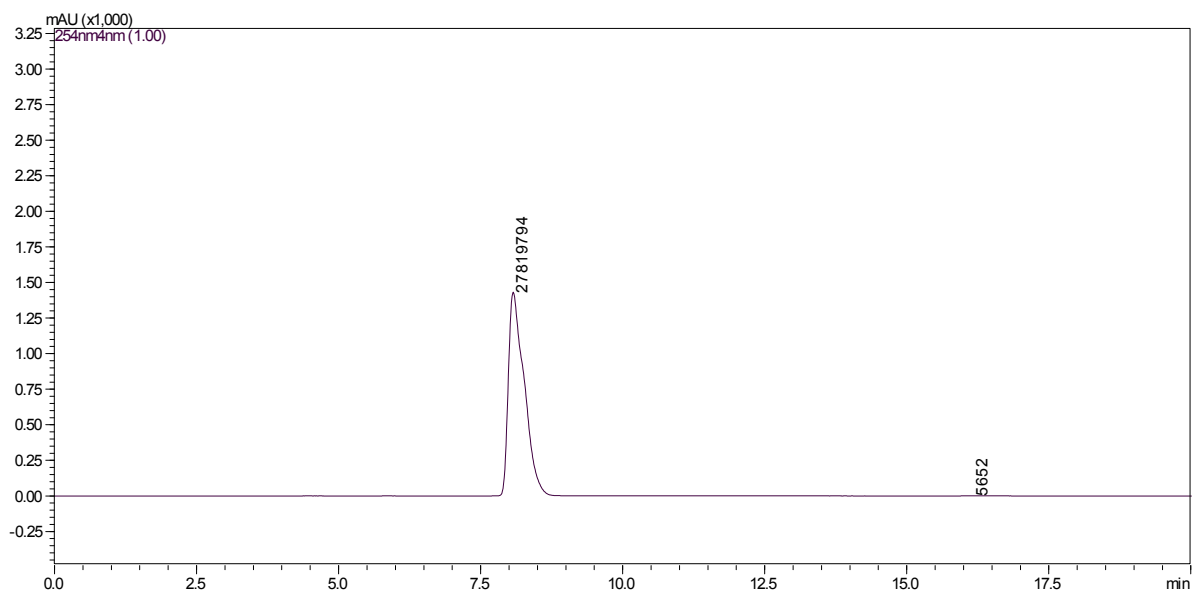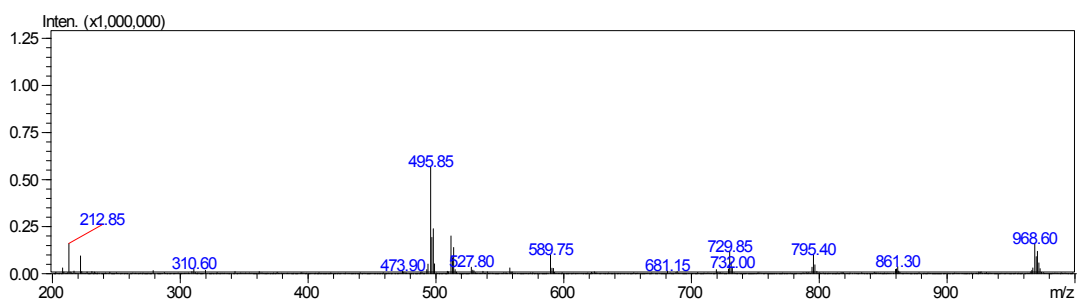

ESI-MS, positive mode: m/z calcd mass for  $C_{27}H_{24}ClN_3O_3Na$   $[M + Na]^+ = 496.14$ ; found 495.85.

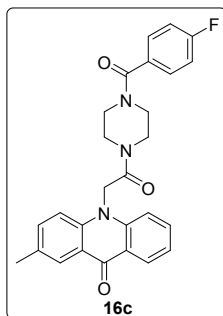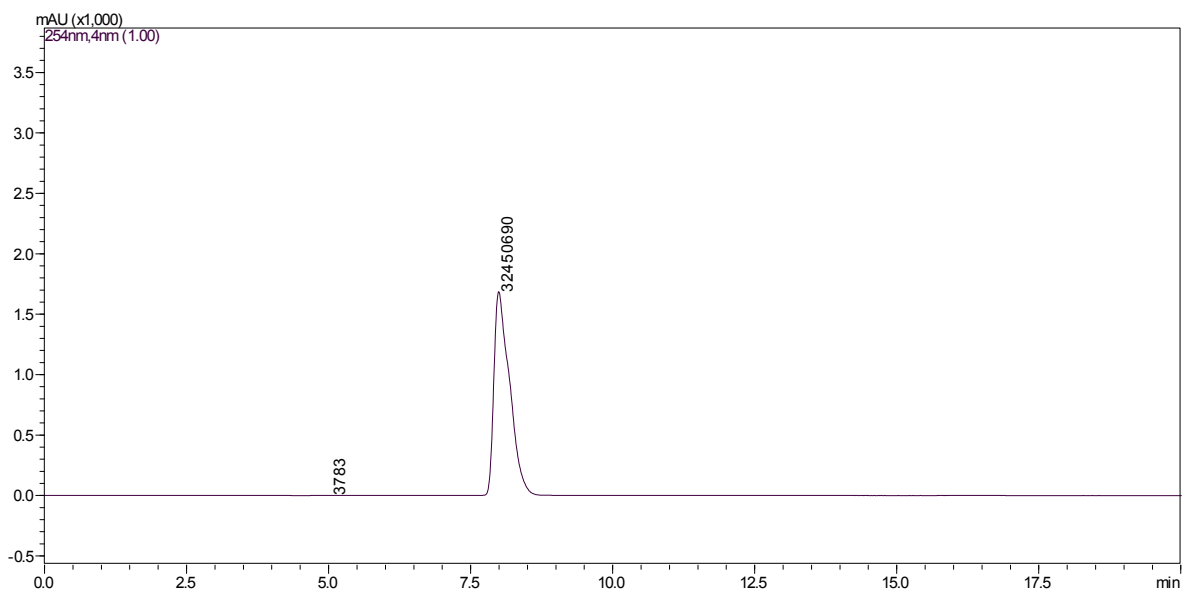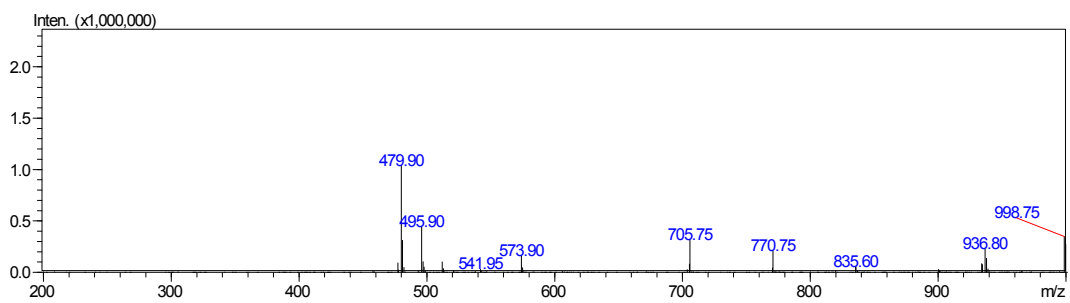

ESI-MS, positive mode: m/z calcd mass for  $C_{27}H_{24}FN_3O_3Na$   $[M + Na]^+$  = 480.17; found 479.90.

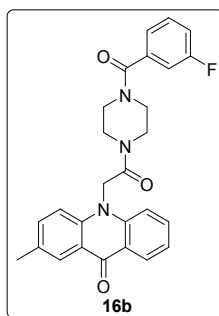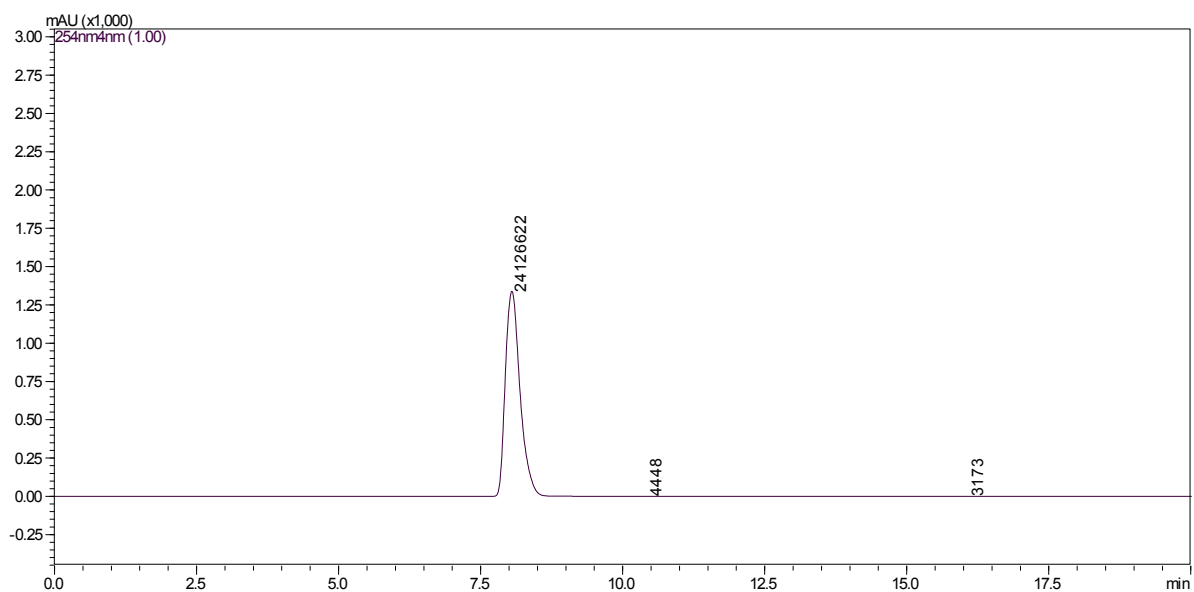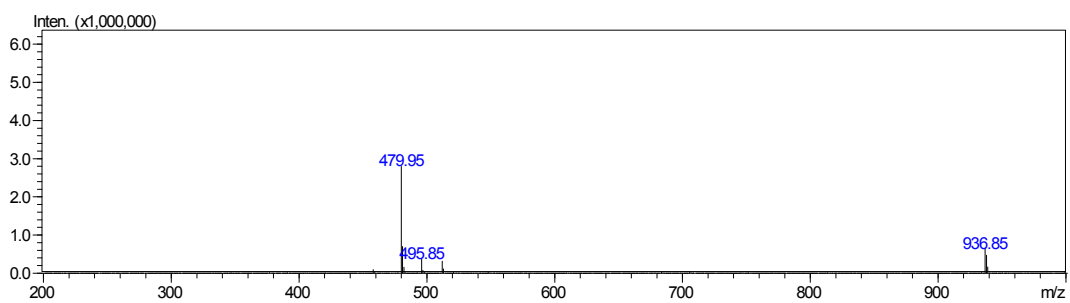

ESI-MS, positive mode: m/z calcd mass for  $C_{27}H_{24}FN_3O_3Na$   $[M + Na]^+$  = 480.17; found 479.95.

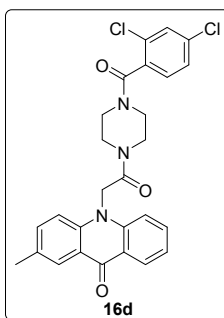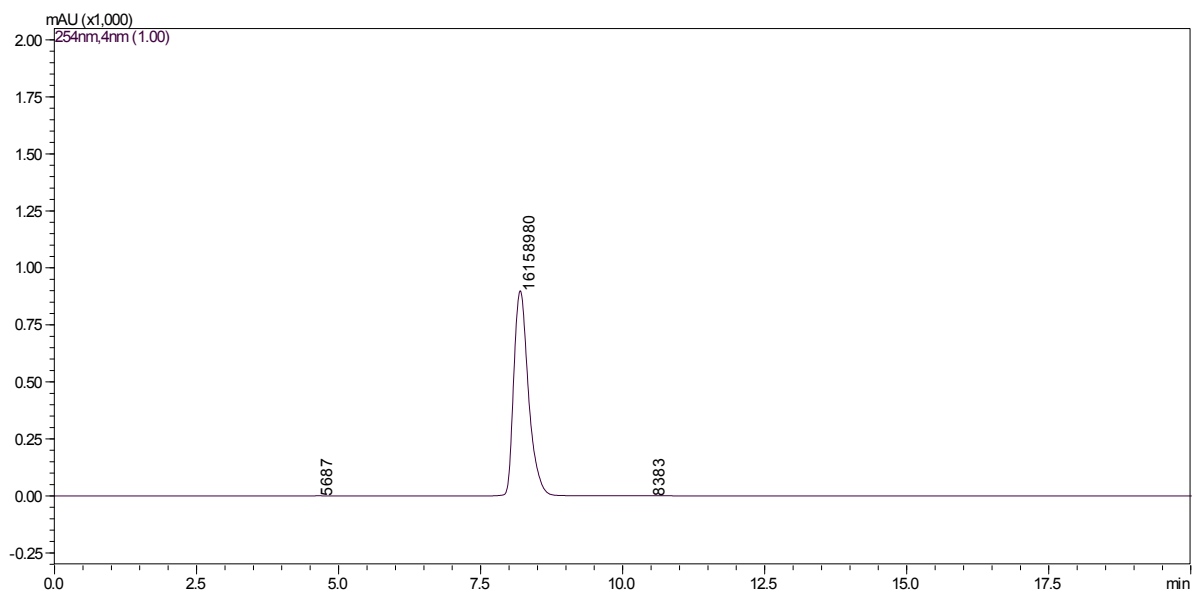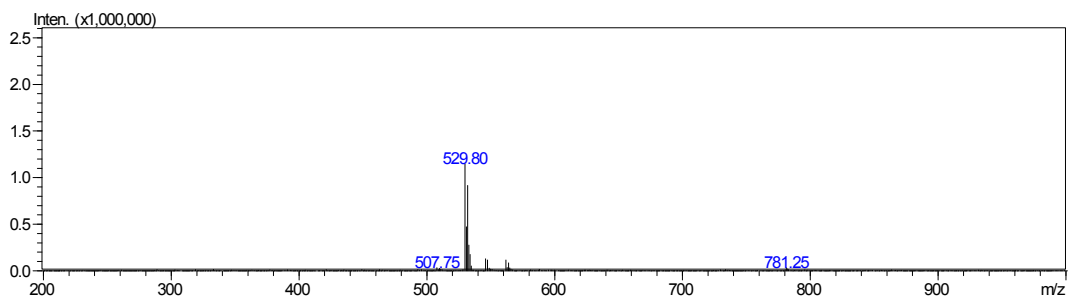

ESI-MS, positive mode: m/z calcd mass for  $C_{27}H_{23}Cl_2N_3O_3Na$   $[M + Na]^+ = 530.10$ ; found 529.80.

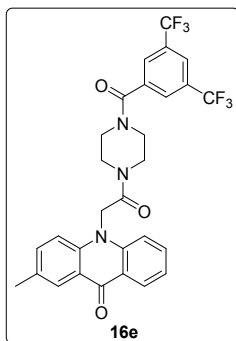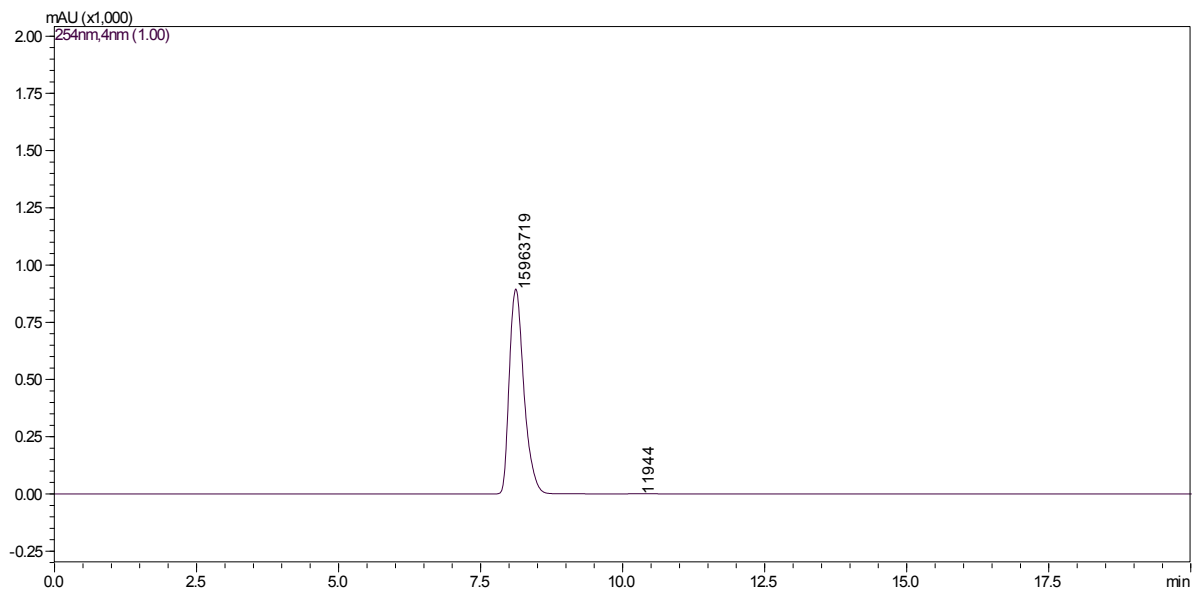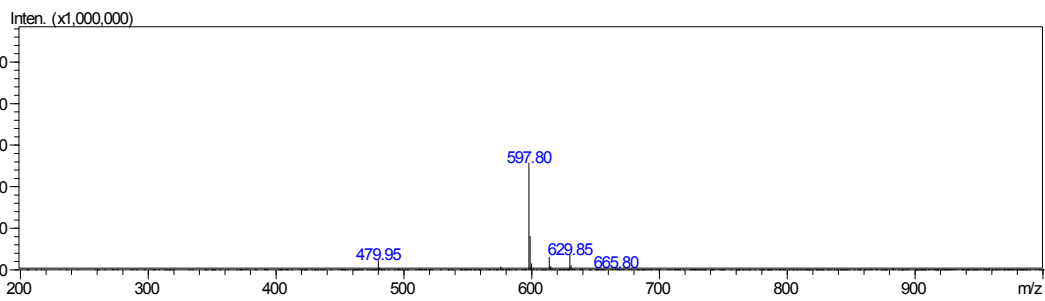

ESI-MS, positive mode:  $m/z$  calcd mass for  $C_{29}H_{23}F_6N_3O_3Na$   $[M + Na]^+ = 598.15$ ; found 597.80.



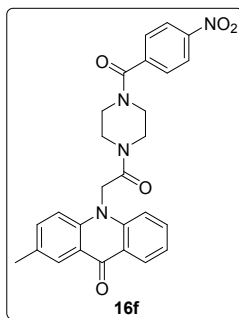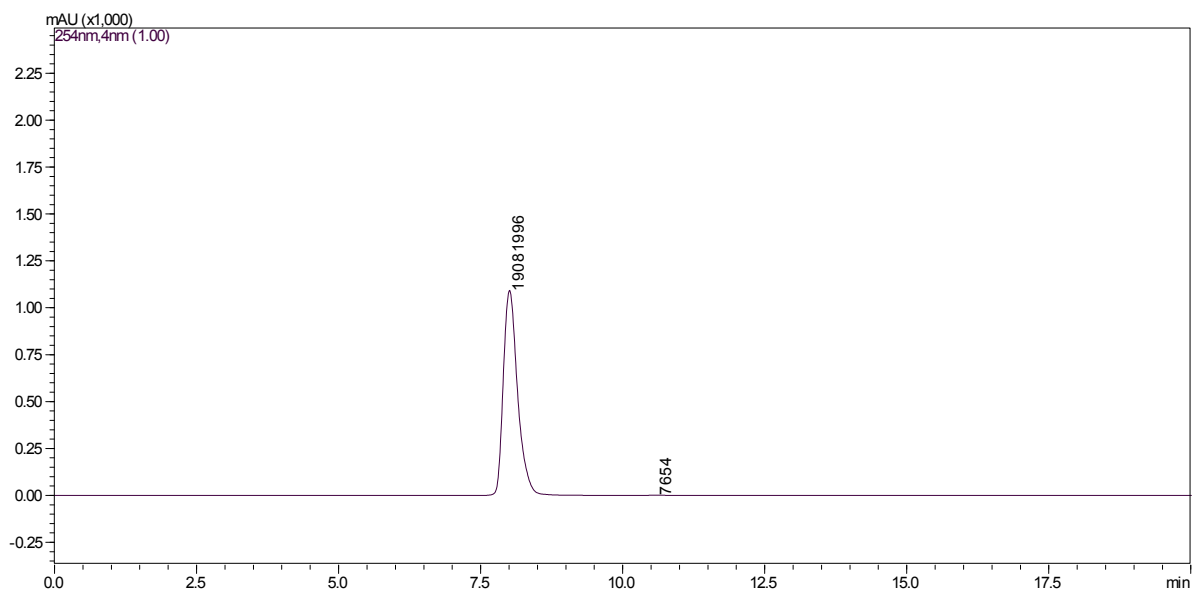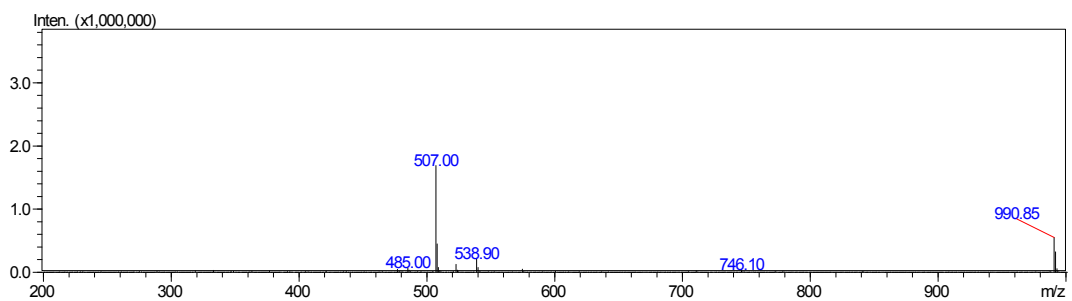

ESI-MS, positive mode: m/z calcd mass for  $C_{27}H_{24}N_4O_5Na$   $[M + Na]^+ = 507.16$ ; found 507.00.

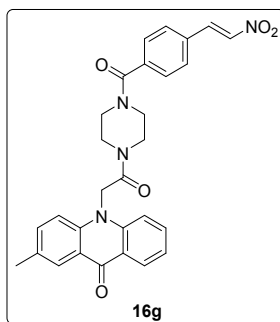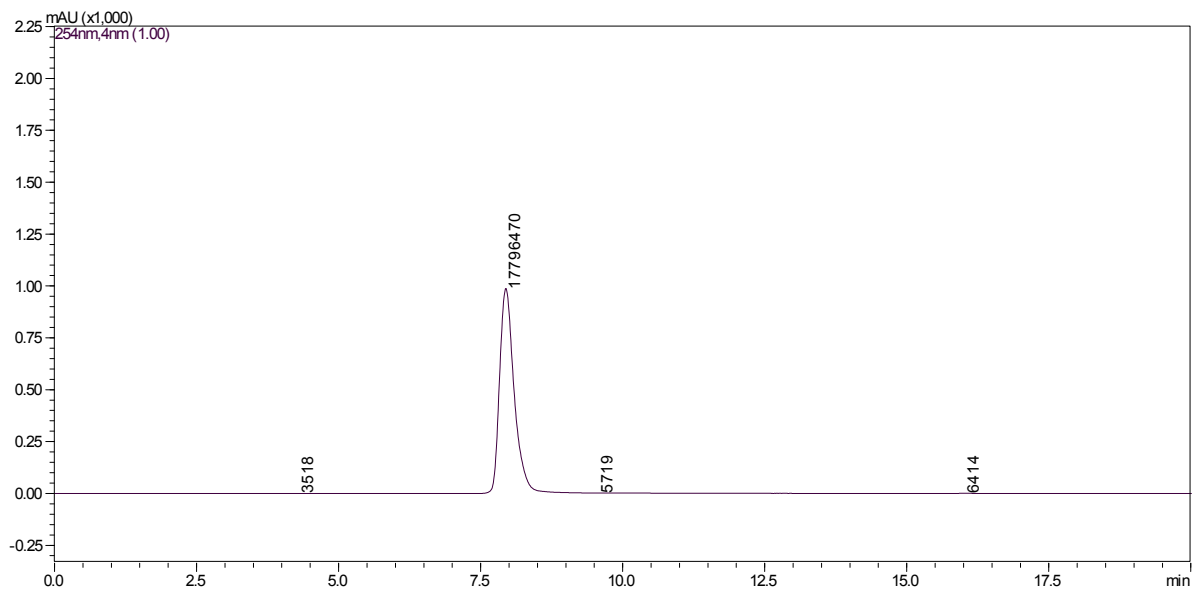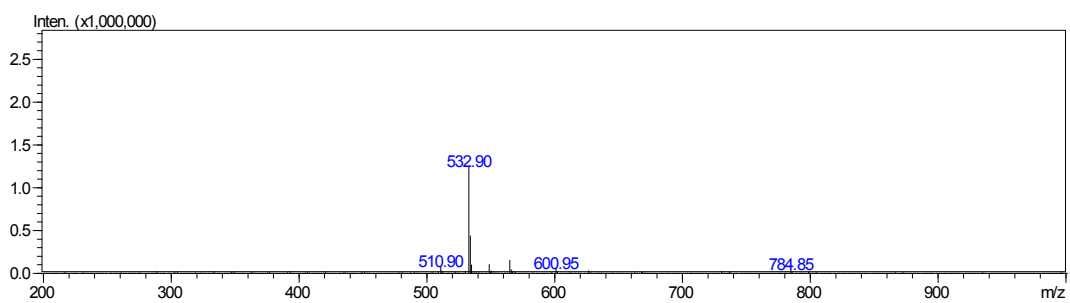

ESI-MS, positive mode: m/z calcd mass for  $C_{29}H_{26}N_4O_5Na$   $[M + Na]^+ = 533.18$ ; found 532.90.

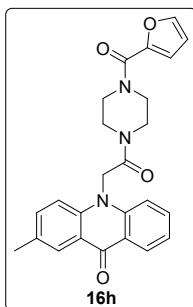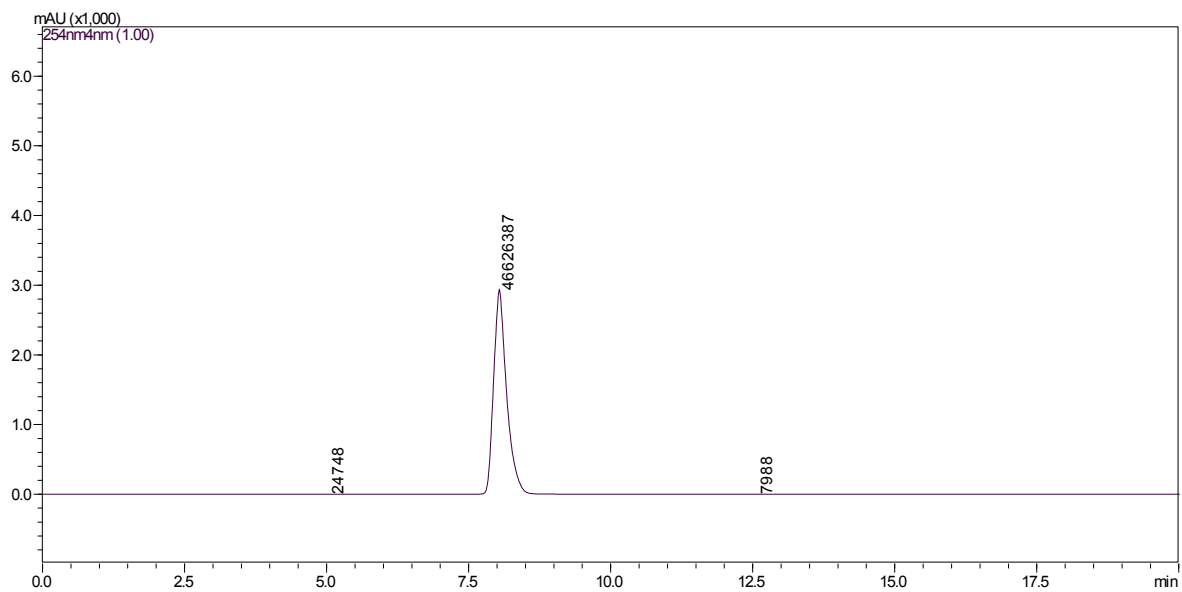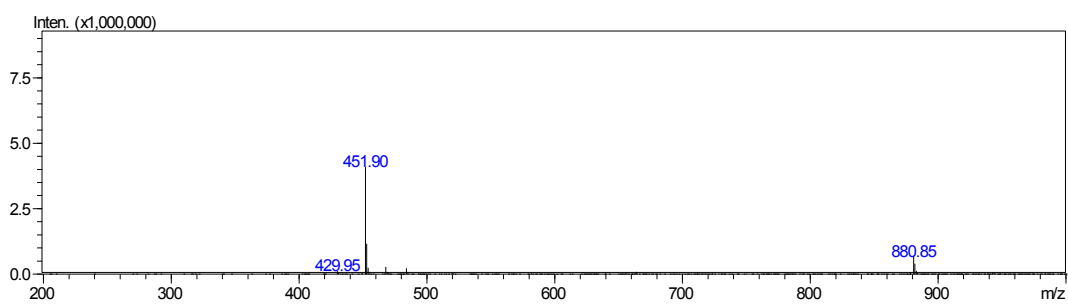

ESI-MS, positive mode: m/z calcd mass for  $C_{25}H_{23}N_3O_4Na$   $[M + Na]^+ = 452.16$ ; found 451.90.

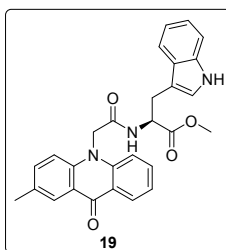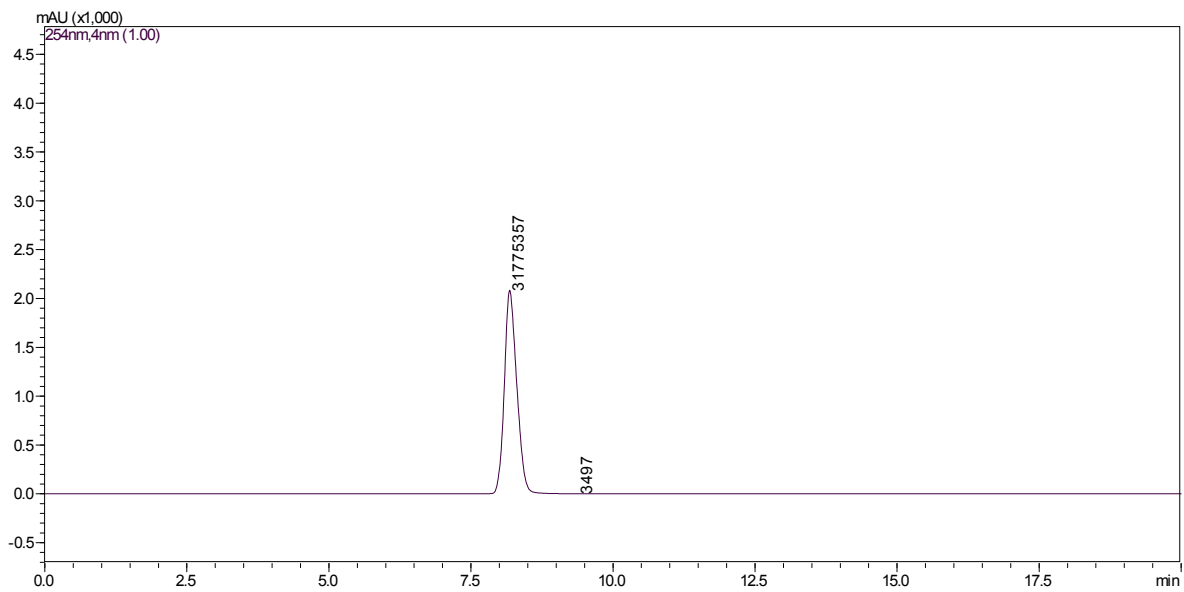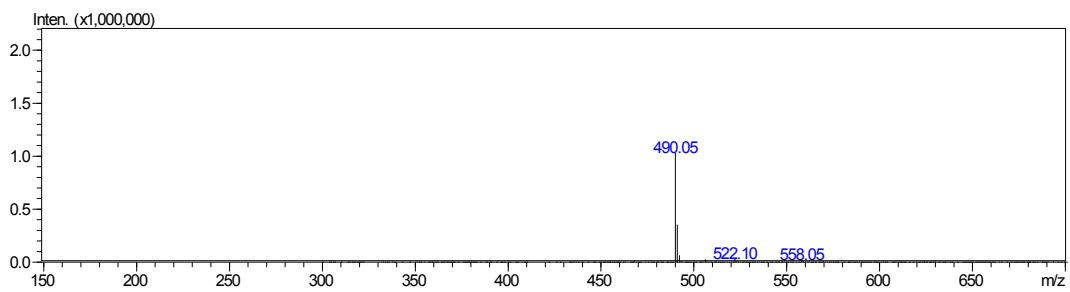

ESI-MS, positive mode: m/z calcd mass for  $C_{28}H_{25}N_3O_4Na$   $[M + Na]^+ = 490.17$ ; found 490.05.

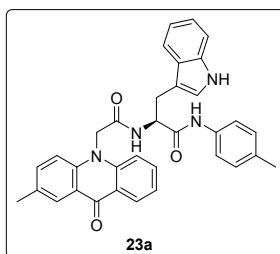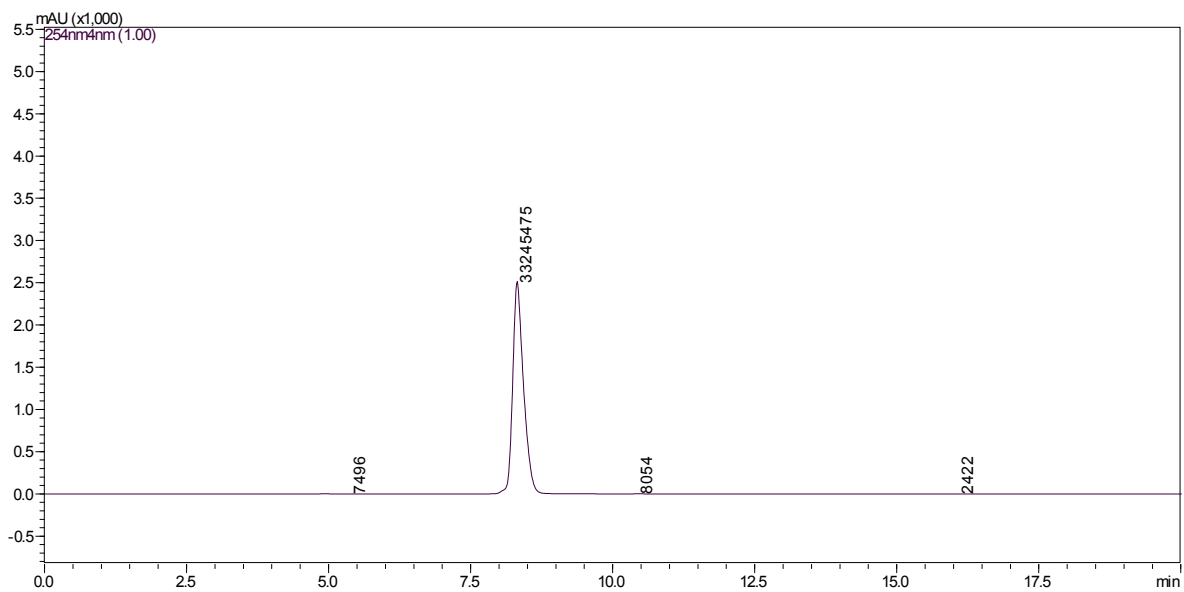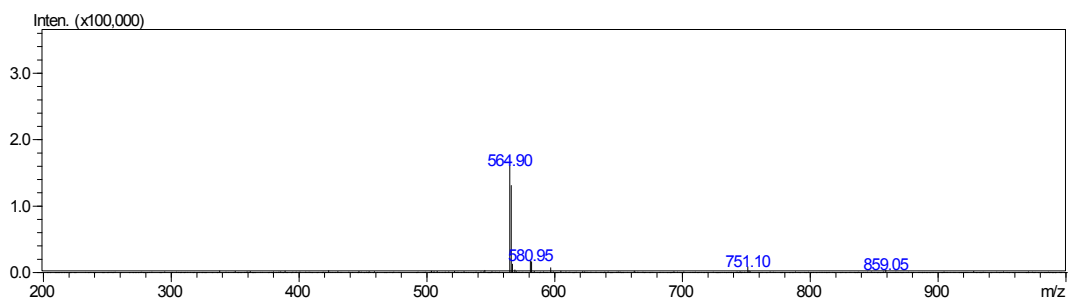

ESI-MS, positive mode: m/z calcd mass for  $C_{34}H_{30}N_4O_3Na$   $[M + Na]^+ = 565.22$ ; found 564.90.

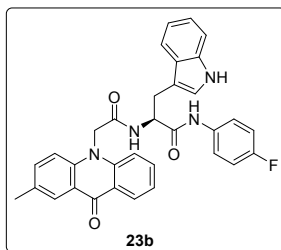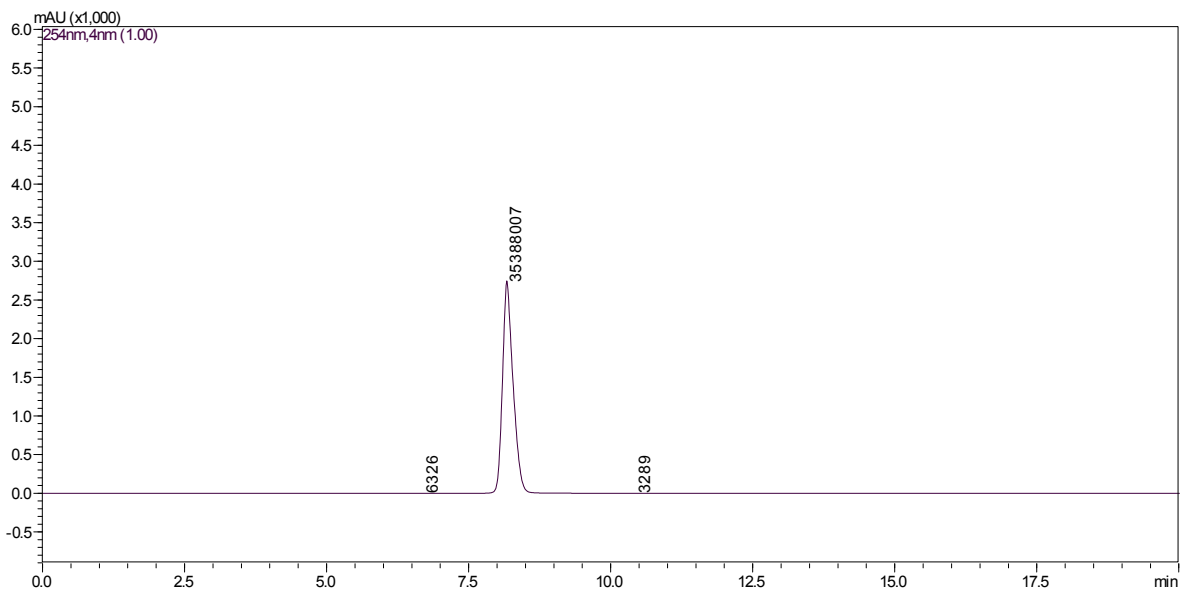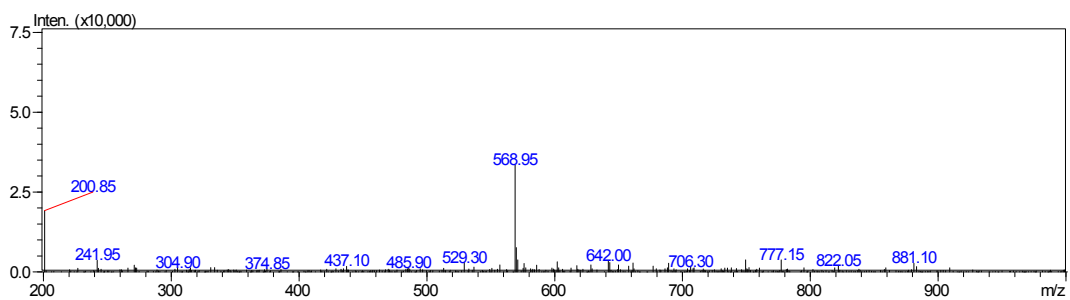

ESI-MS, positive mode: m/z calcd mass for  $C_{33}H_{27}FN_4O_3Na$   $[M + Na]^+$  = 569.20; found 568.95.

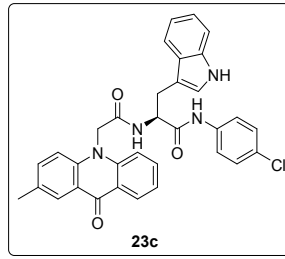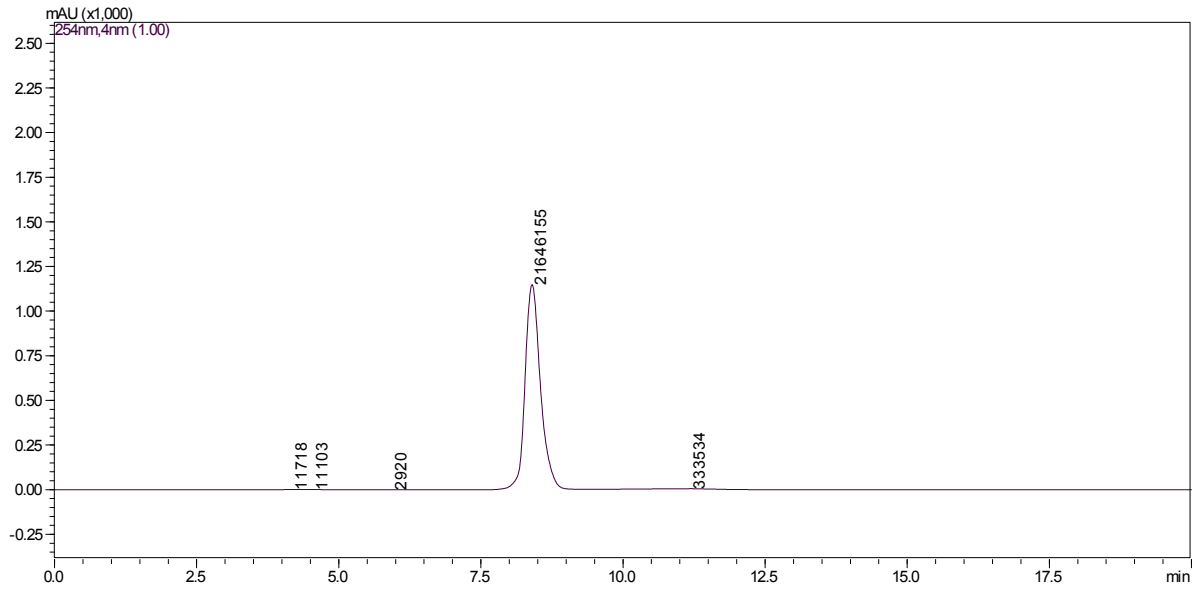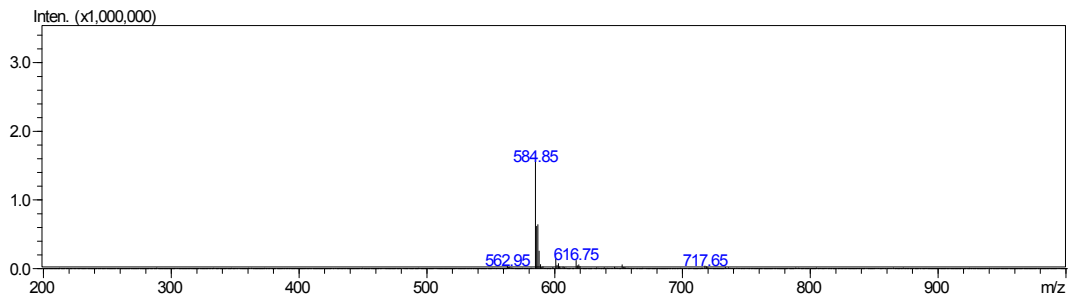

ESI-MS, positive mode: m/z calcd mass for  $C_{33}H_{27}ClN_4O_3Na$   $[M + Na]^+$  = 585.17; found 584.85.

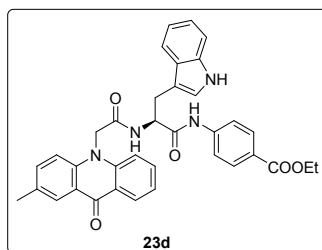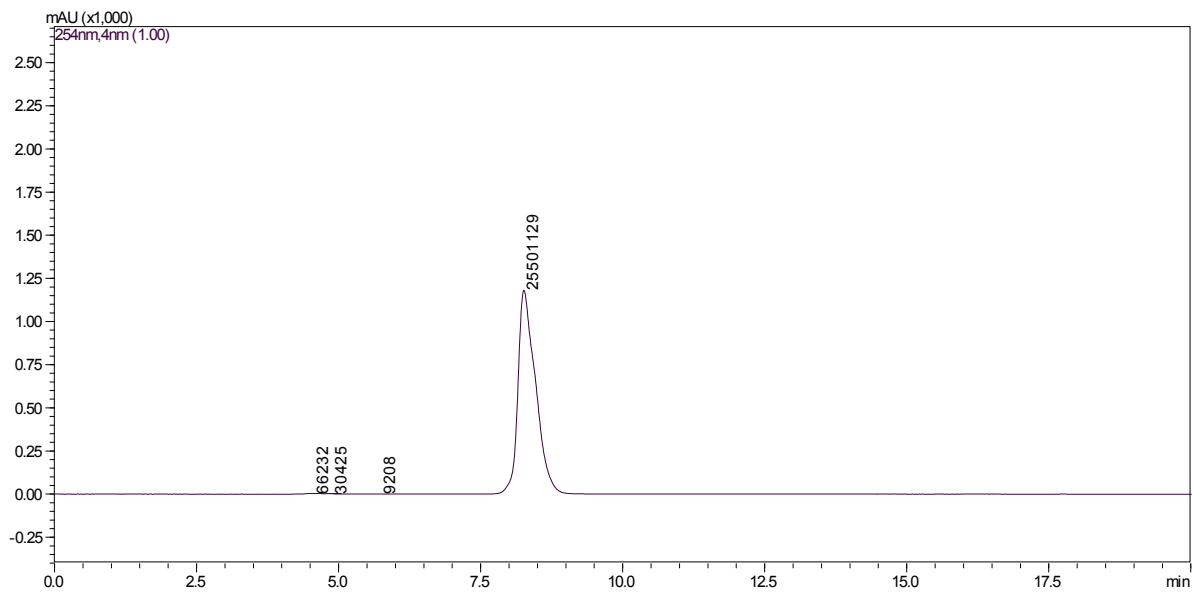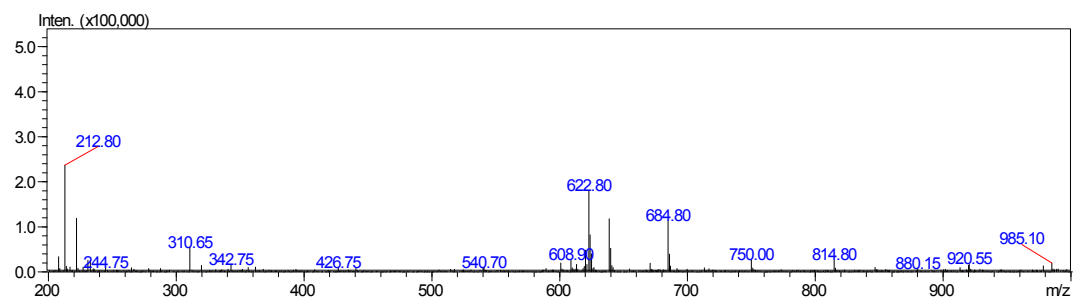

ESI-MS, positive mode:  $m/z$  calcd mass for  $C_{36}H_{32}N_4O_5Na$   $[M + Na]^+ = 623.22$ ; found 622.80.



Analytical method for compounds **14** and **20**:

LC-MS/HPLC: LC-20AD Shimadzu connected to Shimadzu LCMS-2010EV

Mobile Phase A: 0.1% FA in water

Mobile Phase B: 0.1% FA in acetonitrile

HPLC column: Poroshell 120 EC-C18, 4.6 x 100 mm, 2.7  $\mu$ m

Flow rate: 0.4 mL/min

Run time: 40 min

Column temperature: 26°C

UV detector: 254 nm

MS detector: 1.65 kV

LC isocratic:

| Time (min) | Mobile Phase A (%) | Mobile Phase B (%) |
|------------|--------------------|--------------------|
| 0          | 90                 | 10                 |
| 30         | 10                 | 90                 |
| 32         | 10                 | 90                 |
| 35         | 10                 | 90                 |
| 40         | 90                 | 10                 |

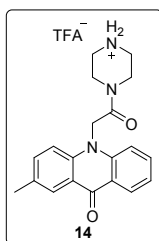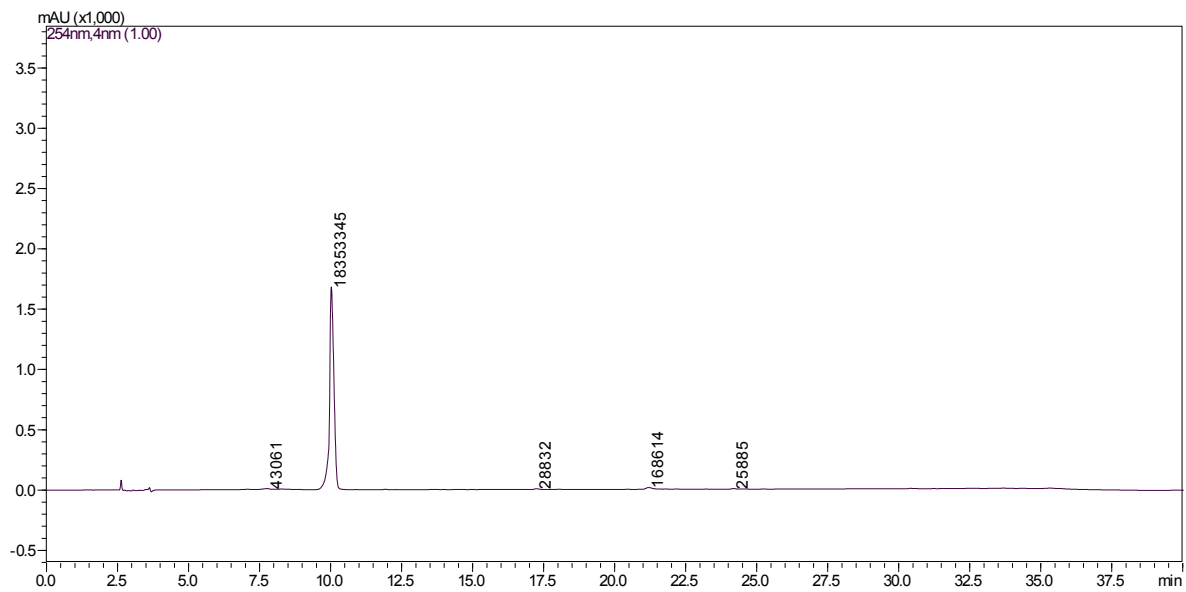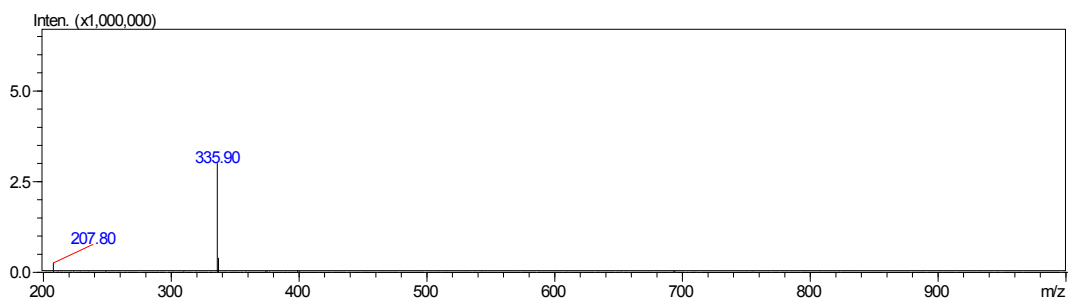

ESI-MS, positive mode: m/z calcd mass for C<sub>20</sub>H<sub>22</sub>N<sub>3</sub>O<sub>2</sub> [M + H]<sup>+</sup> = 336.17; found 335.90.

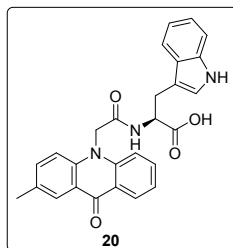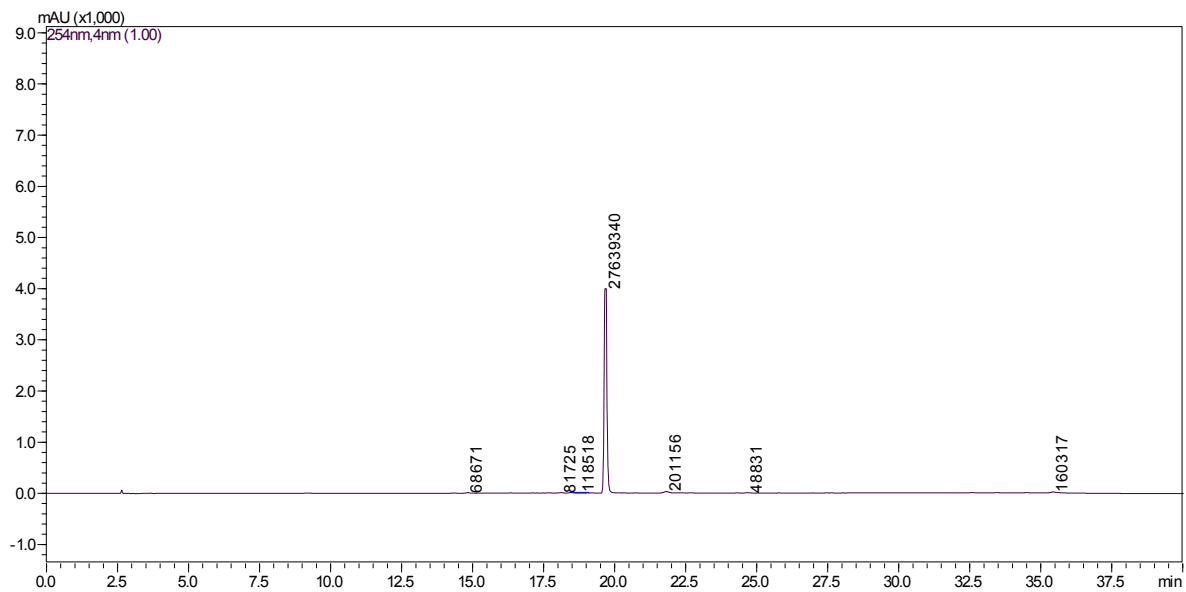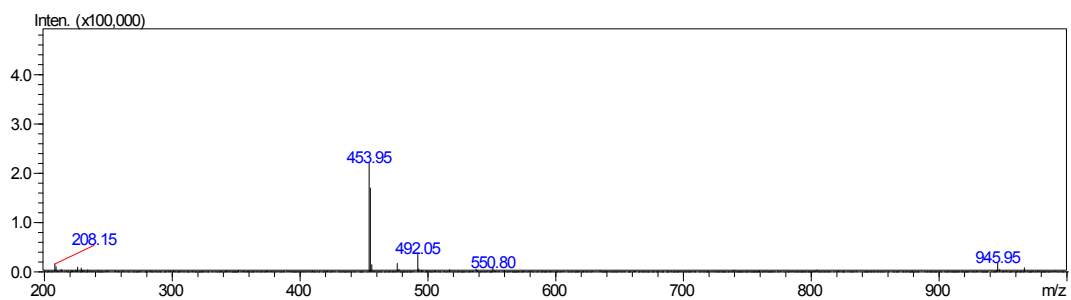

ESI-MS, positive mode: m/z calcd mass for  $C_{27}H_{24}N_3O_4$   $[M + H]^+ = 454.17$ ; found 453.95.
